# Supplementary material
Source: PubMed Central journal article supplement (PMC5437922)
Supplement: ismej2016188x4.pdf [file ismej2016188x4.pdf]

| Metagenome |  | Site fraction | Depth | Temperature (°C) | Location | Work | Exp. 1 | Exp. 2 | Exp. 3 | Exp. 4 | Exp. 5 | Exp. 6 | Exp. 7 | Exp. 8 | Exp. 9 | Exp. 10 | Exp. 11 | Exp. 12 | Exp. 13 | Exp. 14 | Exp. 15 | Exp. 16 | Exp. 17 | Exp. 18 | Exp. 19 | Exp. 20 | Exp. 21 | Exp. 22 | Exp. 23 | Exp. 24 | Exp. 25 | Exp. 26 | Exp. 27 | Exp. 28 | Exp. 29 | Exp. 30 | Exp. 31 | Exp. 32 | Exp. 33 | Exp. 34 | Exp. 35 | Exp. 36 | Exp. 37 | Exp. 38 | Exp. 39 | Exp. 40 | Exp. 41 | Exp. 42 | Exp. 43 | Exp. 44 | Exp. 45 | Exp. 46 | Exp. 47 | Exp. 48 | Exp. 49 | Exp. 50 | Exp. 51 | Exp. 52 | Exp. 53 | Exp. 54 | Exp. 55 | Exp. 56 | Exp. 57 | Exp. 58 | Exp. 59 | Exp. 60 | Exp. 61 | Exp. 62 | Exp. 63 | Exp. 64 | Exp. 65 | Exp. 66 | Exp. 67 | Exp. 68 | Exp. 69 | Exp. 70 | Exp. 71 | Exp. 72 | Exp. 73 | Exp. 74 | Exp. 75 | Exp. 76 | Exp. 77 | Exp. 78 | Exp. 79 | Exp. 80 | Exp. 81 | Exp. 82 | Exp. 83 | Exp. 84 | Exp. 85 | Exp. 86 | Exp. 87 | Exp. 88 | Exp. 89 | Exp. 90 | Exp. 91 | Exp. 92 | Exp. 93 | Exp. 94 | Exp. 95 | Exp. 96 | Exp. 97 | Exp. 98 | Exp. 99 | Exp. 100 | Exp. 101 | Exp. 102 | Exp. 103 | Exp. 104 | Exp. 105 | Exp. 106 | Exp. 107 | Exp. 108 | Exp. 109 | Exp. 110 | Exp. 111 | Exp. 112 | Exp. 113 | Exp. 114 | Exp. 115 | Exp. 116 | Exp. 117 | Exp. 118 | Exp. 119 | Exp. 120 | Exp. 121 | Exp. 122 | Exp. 123 | Exp. 124 | Exp. 125 | Exp. 126 | Exp. 127 | Exp. 128 | Exp. 129 | Exp. 130 | Exp. 131 | Exp. 132 | Exp. 133 | Exp. 134 | Exp. 135 | Exp. 136 | Exp. 137 | Exp. 138 | Exp. 139 | Exp. 140 | Exp. 141 | Exp. 142 | Exp. 143 | Exp. 144 | Exp. 145 | Exp. 146 | Exp. 147 | Exp. 148 | Exp. 149 | Exp. 150 | Exp. 151 | Exp. 152 | Exp. 153 | Exp. 154 | Exp. 155 | Exp. 156 | Exp. 157 | Exp. 158 | Exp. 159 | Exp. 160 | Exp. 161 | Exp. 162 | Exp. 163 | Exp. 164 | Exp. 165 | Exp. 166 | Exp. 167 | Exp. 168 | Exp. 169 | Exp. 170 | Exp. 171 | Exp. 172 | Exp. 173 | Exp. 174 | Exp. 175 | Exp. 176 | Exp. 177 | Exp. 178 | Exp. 179 | Exp. 180 | Exp. 181 | Exp. 182 | Exp. 183 | Exp. 184 | Exp. 185 | Exp. 186 | Exp. 187 | Exp. 188 | Exp. 189 | Exp. 190 | Exp. 191 | Exp. 192 | Exp. 193 | Exp. 194 | Exp. 195 | Exp. 196 | Exp. 197 | Exp. 198 | Exp. 199 | Exp. 200 | Exp. 201 | Exp. 202 | Exp. 203 | Exp. 204 | Exp. 205 | Exp. 206 | Exp. 207 | Exp. 208 | Exp. 209 | Exp. 210 | Exp. 211 | Exp. 212 | Exp. 213 | Exp. 214 | Exp. 215 | Exp. 216 | Exp. 217 | Exp. 218 | Exp. 219 | Exp. 220 | Exp. 221 | Exp. 222 | Exp. 223 | Exp. 224 | Exp. 225 | Exp. 226 | Exp. 227 | Exp. 228 | Exp. 229 | Exp. 230 | Exp. 231 | Exp. 232 | Exp. 233 | Exp. 234 | Exp. 235 | Exp. 236 | Exp. 237 | Exp. 238 | Exp. 239 | Exp. 240 | Exp. 241 | Exp. 242 | Exp. 243 | Exp. 244 | Exp. 245 | Exp. 246 | Exp. 247 | Exp. 248 | Exp. 249 | Exp. 250 | Exp. 251 | Exp. 252 | Exp. 253 | Exp. 254 | Exp. 255 | Exp. 256 | Exp. 257 | Exp. 258 | Exp. 259 | Exp. 260 | Exp. 261 | Exp. 262 | Exp. 263 | Exp. 264 | Exp. 265 | Exp. 266 | Exp. 267 | Exp. 268 | Exp. 269 | Exp. 270 | Exp. 271 | Exp. 272 | Exp. 273 | Exp. 274 | Exp. 275 | Exp. 276 | Exp. 277 | Exp. 278 | Exp. 279 | Exp. 280 | Exp. 281 | Exp. 282 | Exp. 283 | Exp. 284 | Exp. 285 | Exp. 286 | Exp. 287 | Exp. 288 | Exp. 289 | Exp. 290 | Exp. 291 | Exp. 292 | Exp. 293 | Exp. 294 | Exp. 295 | Exp. 296 | Exp. 297 | Exp. 298 | Exp. 299 | Exp. 300 | Exp. 301 | Exp. 302 | Exp. 303 | Exp. 304 | Exp. 305 | Exp. 306 | Exp. 307 | Exp. 308 | Exp. 309 | Exp. 310 | Exp. 311 | Exp. 312 | Exp. 313 | Exp. 314 | Exp. 315 | Exp. 316 | Exp. 317 | Exp. 318 | Exp. 319 | Exp. 320 | Exp. 321 | Exp. 322 | Exp. 323 | Exp. 324 | Exp. 325 | Exp. 326 | Exp. 327 | Exp. 328 | Exp. 329 | Exp. 330 | Exp. 331 | Exp. 332 | Exp. 333 | Exp. 334 | Exp. 335 | Exp. 336 | Exp. 337 | Exp. 338 | Exp. 339 | Exp. 340 | Exp. 341 | Exp. 342 | Exp. 343 | Exp. 344 | Exp. 345 | Exp. 346 | Exp. 347 | Exp. 348 | Exp. 349 | Exp. 350 | Exp. 351 | Exp. 352 | Exp. 353 | Exp. 354 | Exp. 355 | Exp. 356 | Exp. 357 | Exp. 358 | Exp. 359 | Exp. 360 | Exp. 361 | Exp. 362 | Exp. 363 | Exp. 364 | Exp. 365 | Exp. 366 | Exp. 367 | Exp. 368 | Exp. 369 | Exp. 370 | Exp. 371 | Exp. 372 | Exp. 373 | Exp. 374 |
|------------|--|---------------|-------|------------------|----------|------|--------|--------|--------|--------|--------|--------|--------|--------|--------|---------|---------|---------|---------|---------|---------|---------|---------|---------|---------|---------|---------|---------|---------|---------|---------|---------|---------|---------|---------|---------|---------|---------|---------|---------|---------|---------|---------|---------|---------|---------|---------|---------|---------|---------|---------|---------|---------|---------|---------|---------|---------|---------|---------|---------|---------|---------|---------|---------|---------|---------|---------|---------|---------|---------|---------|---------|---------|---------|---------|---------|---------|---------|---------|---------|---------|---------|---------|---------|---------|---------|---------|---------|---------|---------|---------|---------|---------|---------|---------|---------|---------|---------|---------|---------|---------|---------|---------|---------|---------|----------|----------|----------|----------|----------|----------|----------|----------|----------|----------|----------|----------|----------|----------|----------|----------|----------|----------|----------|----------|----------|----------|----------|----------|----------|----------|----------|----------|----------|----------|----------|----------|----------|----------|----------|----------|----------|----------|----------|----------|----------|----------|----------|----------|----------|----------|----------|----------|----------|----------|----------|----------|----------|----------|----------|----------|----------|----------|----------|----------|----------|----------|----------|----------|----------|----------|----------|----------|----------|----------|----------|----------|----------|----------|----------|----------|----------|----------|----------|----------|----------|----------|----------|----------|----------|----------|----------|----------|----------|----------|----------|----------|----------|----------|----------|----------|----------|----------|----------|----------|----------|----------|----------|----------|----------|----------|----------|----------|----------|----------|----------|----------|----------|----------|----------|----------|----------|----------|----------|----------|----------|----------|----------|----------|----------|----------|----------|----------|----------|----------|----------|----------|----------|----------|----------|----------|----------|----------|----------|----------|----------|----------|----------|----------|----------|----------|----------|----------|----------|----------|----------|----------|----------|----------|----------|----------|----------|----------|----------|----------|----------|----------|----------|----------|----------|----------|----------|----------|----------|----------|----------|----------|----------|----------|----------|----------|----------|----------|----------|----------|----------|----------|----------|----------|----------|----------|----------|----------|----------|----------|----------|----------|----------|----------|----------|----------|----------|----------|----------|----------|----------|----------|----------|----------|----------|----------|----------|----------|----------|----------|----------|----------|----------|----------|----------|----------|----------|----------|----------|----------|----------|----------|----------|----------|----------|----------|----------|----------|----------|----------|----------|----------|----------|----------|----------|----------|----------|----------|----------|----------|----------|----------|----------|----------|----------|----------|----------|----------|----------|----------|----------|----------|----------|----------|----------|----------|----------|----------|----------|----------|----------|----------|----------|----------|----------|----------|----------|----------|----------|----------|----------|----------|----------|----------|----------|
|------------|--|---------------|-------|------------------|----------|------|--------|--------|--------|--------|--------|--------|--------|--------|--------|---------|---------|---------|---------|---------|---------|---------|---------|---------|---------|---------|---------|---------|---------|---------|---------|---------|---------|---------|---------|---------|---------|---------|---------|---------|---------|---------|---------|---------|---------|---------|---------|---------|---------|---------|---------|---------|---------|---------|---------|---------|---------|---------|---------|---------|---------|---------|---------|---------|---------|---------|---------|---------|---------|---------|---------|---------|---------|---------|---------|---------|---------|---------|---------|---------|---------|---------|---------|---------|---------|---------|---------|---------|---------|---------|---------|---------|---------|---------|---------|---------|---------|---------|---------|---------|---------|---------|---------|---------|---------|----------|----------|----------|----------|----------|----------|----------|----------|----------|----------|----------|----------|----------|----------|----------|----------|----------|----------|----------|----------|----------|----------|----------|----------|----------|----------|----------|----------|----------|----------|----------|----------|----------|----------|----------|----------|----------|----------|----------|----------|----------|----------|----------|----------|----------|----------|----------|----------|----------|----------|----------|----------|----------|----------|----------|----------|----------|----------|----------|----------|----------|----------|----------|----------|----------|----------|----------|----------|----------|----------|----------|----------|----------|----------|----------|----------|----------|----------|----------|----------|----------|----------|----------|----------|----------|----------|----------|----------|----------|----------|----------|----------|----------|----------|----------|----------|----------|----------|----------|----------|----------|----------|----------|----------|----------|----------|----------|----------|----------|----------|----------|----------|----------|----------|----------|----------|----------|----------|----------|----------|----------|----------|----------|----------|----------|----------|----------|----------|----------|----------|----------|----------|----------|----------|----------|----------|----------|----------|----------|----------|----------|----------|----------|----------|----------|----------|----------|----------|----------|----------|----------|----------|----------|----------|----------|----------|----------|----------|----------|----------|----------|----------|----------|----------|----------|----------|----------|----------|----------|----------|----------|----------|----------|----------|----------|----------|----------|----------|----------|----------|----------|----------|----------|----------|----------|----------|----------|----------|----------|----------|----------|----------|----------|----------|----------|----------|----------|----------|----------|----------|----------|----------|----------|----------|----------|----------|----------|----------|----------|----------|----------|----------|----------|----------|----------|----------|----------|----------|----------|----------|----------|----------|----------|----------|----------|----------|----------|----------|----------|----------|----------|----------|----------|----------|----------|----------|----------|----------|----------|----------|----------|----------|----------|----------|----------|----------|----------|----------|----------|----------|----------|----------|----------|----------|----------|----------|----------|----------|----------|----------|----------|----------|----------|----------|----------|----------|----------|----------|----------|----------|----------|----------|----------|----------|----------|

Highlighted in grey, list of the 33 metagenomes that were assembled and used for the differential coverage in the binning procedure.
