# Supplementary material
Source: PubMed Central journal article supplement (PMC5437922)
Supplement: ismej2016188x6.pdf [file ismej2016188x6.pdf]

Supplementary Table 4. Housekeeping genes found in the MG-III bins and the CG-MG-III bins (as Naransigarao et al. 2012).

|                 |                                                      | Number of housekeeping genes found in the MG-III bins                      |       |       |       |      |      |      |      |        |        | Number of housekeeping genes found in the CG-MG-III bins |      |      |      |      |        |        |        | Number of housekeeping genes found in reference genomes |           |            |            |   |
|-----------------|------------------------------------------------------|----------------------------------------------------------------------------|-------|-------|-------|------|------|------|------|--------|--------|----------------------------------------------------------|------|------|------|------|--------|--------|--------|---------------------------------------------------------|-----------|------------|------------|---|
|                 |                                                      | Epi1                                                                       | Epi2A | Epi2B | Epi2C | Epi3 | Epi4 | Epi5 | Epi6 | Bathy1 | Bathy2 | Epi1                                                     | Epi2 | Epi3 | Epi4 | Epi5 | Epi6   | Bathy1 | Bathy2 | Cayman 92                                               | Cayman 93 | Guaymas 31 | Guaymas 32 |   |
|                 |                                                      |                                                                            |       |       |       |      |      |      |      |        |        |                                                          |      |      |      |      |        |        |        |                                                         |           |            |            |   |
|                 | % Completeness estimation (Raes et al. 2007)         | 80                                                                         | 54.3  | 57.1  | 5.7   | 48.6 | 34.3 | 2.9  | 51.4 | 54.3   | 68.6   | 85.7                                                     | 80   | 62.9 | 34.3 | 2.9  | 57.1   | 60     | 68.6   | 71.4                                                    | 34.3      | 91.4       | 94.3       |   |
|                 | % Completeness estimation (Albertsen et al. 2013)    | 35.1                                                                       | 16.2  | 18.0  | 4.5   | 19.8 | 15.3 | 3.6  | 15.3 | 23.4   | 18.9   | 34.2                                                     | 30.6 | 24.3 | 16.2 | 4.5  | 21.6   | 26.1   | 21.6   | 21.6                                                    | 15.3      | 33.3       | 37.8       |   |
|                 | % Completeness estimation (Naransigarao et al. 2012) | 83.0                                                                       | 45.3  | 54.7  | 5.7   | 45.3 | 39.6 | 7.6  | 54.7 | 60.4   | 58.5   | 84.9                                                     | 75.2 | 62.3 | 43.4 | 9.4  | 60.4   | 64.2   | 58.5   | 67.9                                                    | 35.9      | 92.5       | 90.6       |   |
|                 | # of genome-species inside the bin                   | 3.07                                                                       | 1.08  | 1.03  | 1.00  | 1.00 | 1.00 | 1.00 | 1.48 | 1.09   | 2.32   | 1.18                                                     | 1.43 | 1    | 1    | 1    | 1.0385 | 1.14   | 1      | 1                                                       | 1         | 1          | 1.86       |   |
| Ribosomal genes | 16S RNA                                              | -                                                                          | -     | -     | -     | -    | -    | -    | -    | 1      | -      | -                                                        | -    | -    | -    | -    | -      | 1      | -      | -                                                       | -         | -          | 3          |   |
|                 | 23S RNA                                              | -                                                                          | -     | -     | -     | -    | -    | -    | -    | 1      | -      | -                                                        | -    | -    | -    | -    | -      | 1      | -      | -                                                       | -         | -          | 3          |   |
| COG             | COG classification                                   |                                                                            |       |       |       |      |      |      |      |        |        |                                                          |      |      |      |      |        |        |        |                                                         |           |            |            |   |
|                 | COG0008                                              | GlnS COG0008 472 Glutamyl- and glutamyl-tRNA synthetases                   | 3     | 1     | 1     | -    | -    | -    | -    | -      | 1      | -                                                        | 2    | 2    | -    | 1    | 1      | -      | 1      | -                                                       | 1         | -          | 1          | 1 |
|                 | COG0012                                              | Predicted GTPase, probable translation factor                              | 1     | -     | -     | -    | -    | -    | -    | -      | 1      | -                                                        | 1    | -    | -    | -    | -      | -      | 2      | -                                                       | -         | -          | 1          | 1 |
|                 | COG0013                                              | AlaS COG0013 879 Alanine-tRNA synthetase                                   | 1     | 1     | -     | -    | 1    | 1    | -    | -      | 2      | 1                                                        | 1    | 2    | 1    | 1    | -      | -      | 1      | 1                                                       | -         | -          | 1          | 1 |
|                 | COG0016                                              | PheS COG0016 335 Phenylalanyl-tRNA synthetase alpha subunit                | 3     | 1     | -     | 1    | 1    | -    | -    | -      | 1      | 1                                                        | 1    | 2    | 1    | -    | -      | -      | 1      | 1                                                       | 1         | 1          | 1          | 2 |
|                 | COG0018                                              | ArgS COG0018 577 Arginyl-tRNA synthetase                                   | 2     | -     | -     | -    | 1    | 1    | 1    | 1      | 1      | -                                                        | 2    | -    | 1    | 1    | 1      | 1      | 1      | 1                                                       | -         | 1          | 1          | 2 |
|                 | COG0024                                              | Map COG0024 255 Methionine aminopeptidase                                  | 5     | 1     | 1     | -    | 1    | 1    | 1    | 1      | 2      | -                                                        | 1    | 2    | 1    | 1    | 1      | 1      | 3      | -                                                       | 1         | -          | 1          | 2 |
|                 | COG0048                                              | RpsL COG0048 129 Ribosomal protein S12                                     | 2     | -     | 1     | -    | -    | 1    | -    | 2      | 1      | -                                                        | 1    | 1    | 1    | 1    | -      | 1      | 1      | -                                                       | 1         | -          | 1          | 2 |
|                 | COG0049                                              | RpsG COG0049 148 Ribosomal protein S7                                      | 2     | -     | 1     | -    | -    | 1    | -    | 2      | 1      | -                                                        | 1    | 1    | 1    | 1    | -      | 1      | 1      | -                                                       | 1         | -          | 1          | 2 |
|                 | COG0051                                              | RpsJ COG0051 104 Ribosomal protein S10                                     | 1     | -     | 1     | -    | -    | -    | -    | 2      | 1      | -                                                        | 1    | 1    | 1    | -    | -      | 1      | 1      | -                                                       | 1         | -          | 1          | 2 |
|                 | COG0060                                              | IleS COG0060 933 Isoleucyl-tRNA synthetase                                 | 2     | -     | -     | -    | -    | -    | -    | 1      | -      | -                                                        | -    | 1    | -    | -    | -      | 1      | -      | -                                                       | -         | -          | 1          | 2 |
|                 | COG0071                                              | HspA COG0071 146 Molecular chaperone (small heat shock protein)            | 2     | -     | -     | -    | -    | 1    | -    | 1      | 1      | 2                                                        | 1    | -    | -    | 1    | -      | 1      | 1      | 1                                                       | 1         | -          | 1          | 2 |
|                 | COG0080                                              | RplK COG0080 141 Ribosomal protein L11                                     | 2     | 1     | -     | -    | -    | 1    | -    | 1      | 1      | -                                                        | 1    | 2    | 1    | 1    | -      | 1      | 1      | 1                                                       | 1         | -          | 1          | 2 |
|                 | COG0081                                              | RplA COG0081 228 Ribosomal protein L1                                      | 1     | -     | 1     | -    | -    | -    | -    | -      | 1      | 1                                                        | 1    | 1    | 1    | -    | -      | -      | 1      | 1                                                       | 1         | 1          | 1          | 1 |
|                 | COG0085                                              | RpoB COG0085 1060 DNA-directed RNA polymerase, beta subunit/140 kD subunit | -     | -     | 1     | -    | 1    | 1    | -    | 3      | 1      | 3                                                        | -    | 1    | 1    | 1    | -      | 1      | 1      | 1                                                       | 1         | 1          | 1          | 2 |
|                 | COG0086                                              | RpoC COG0086 808 DNA-directed RNA polymerase, beta subunit/160 kD subunit  | -     | -     | 1     | -    | 1    | 1    | -    | 3      | 1      | 3                                                        | -    | 1    | 1    | 1    | -      | 1      | 1      | 1                                                       | 1         | 1          | 1          | 1 |
|                 | COG0087                                              | RplC COG0087 218 Ribosomal protein L3                                      | 5     | -     | 1     | -    | -    | -    | -    | -      | 3      | 1                                                        | 1    | 1    | 1    | -    | -      | -      | -      | 1                                                       | 1         | 1          | 1          | 2 |
|                 | COG0088                                              | RplD COG0088 214 Ribosomal protein L4                                      | 5     | -     | 1     | -    | 1    | -    | -    | -      | 3      | 1                                                        | 1    | 1    | -    | -    | -      | -      | -      | 1                                                       | 1         | 1          | 1          | 2 |
|                 | COG0090                                              | RplB COG0090 275 Ribosomal protein L2                                      | 5     | 1     | 1     | -    | 1    | -    | -    | -      | 3      | 1                                                        | 1    | 1    | 1    | -    | -      | -      | -      | 1                                                       | 1         | 1          | 1          | 1 |
|                 | COG0091                                              | RplV COG0091 120 Ribosomal protein L22                                     | 5     | 1     | 1     | -    | 1    | -    | -    | -      | 3      | 1                                                        | 1    | 1    | -    | -    | -      | -      | -      | 1                                                       | 1         | 1          | 1          | 2 |
|                 | COG0092                                              | RpsC COG0092 233 Ribosomal protein S3                                      | 5     | 1     | 1     | -    | 1    | -    | -    | -      | 3      | 1                                                        | 1    | 1    | 1    | -    | -      | -      | -      | 1                                                       | 1         | 1          | 1          | 2 |
|                 | COG0093                                              | RplN COG0093 122 Ribosomal protein L14                                     | 6     | 1     | 1     | -    | 1    | -    | -    | 1      | -      | 3                                                        | 1    | 2    | 1    | -    | -      | 1      | -      | 1                                                       | 1         | 1          | 1          | 2 |
|                 | COG0094                                              | RplE COG0094 180 Ribosomal protein L5                                      | 6     | 1     | 1     | -    | 1    | -    | -    | 1      | 1      | 3                                                        | 1    | 2    | 1    | -    | -      | 1      | 1      | 1                                                       | 1         | 1          | 1          | 2 |
|                 | COG0096                                              | RpsH COG0096 132 Ribosomal protein S8                                      | 6     | 1     | 1     | -    | 1    | -    | -    | 1      | 1      | 3                                                        | 1    | 2    | 1    | -    | -      | 1      | 1      | 1                                                       | 1         | 1          | 1          | 2 |
|                 | COG0097                                              | RplF COG0097 178 Ribosomal protein L6P/L9E                                 | 6     | 1     | 1     | -    | 1    | -    | -    | 1      | 1      | 3                                                        | 1    | 2    | 1    | -    | -      | 1      | 1      | 1                                                       | 1         | 1          | 1          | 2 |
|                 | COG0098                                              | RpsE COG0098 181 Ribosomal protein S5                                      | 6     | 1     | 1     | -    | 1    | -    | -    | 1      | 1      | 3                                                        | 1    | 2    | 1    | -    | -      | 1      | 1      | 1                                                       | 1         | 1          | 1          | 2 |
|                 | COG0099                                              | RpsM COG0099 121 Ribosomal protein S13                                     | 2     | -     | -     | -    | -    | 1    | -    | -      | 1      | 2                                                        | -    | -    | -    | 1    | -      | -      | -      | 1                                                       | -         | -          | 1          | 2 |
|                 | COG0100                                              | RpsK COG0100 129 Ribosomal protein S11                                     | 2     | -     | -     | -    | -    | 1    | -    | -      | 2      | 2                                                        | -    | -    | -    | 1    | -      | -      | -      | 1                                                       | 1         | 1          | 1          | 2 |
|                 | COG0102                                              | RplM COG0102 148 Ribosomal protein L13                                     | 1     | 1     | -     | -    | -    | 1    | -    | 1      | -      | 3                                                        | 1    | 1    | -    | 1    | -      | 1      | 1      | 1                                                       | 1         | -          | 1          | 2 |
|                 | COG0103                                              | RplS COG0103 130 Ribosomal protein S9                                      | 1     | 1     | -     | -    | -    | 1    | -    | 1      | -      | 3                                                        | 1    | 1    | -    | 1    | -      | 1      | 1      | 1                                                       | 1         | -          | 1          | 2 |
|                 | COG0124                                              | HisS COG0124 429 Histidyl-tRNA synthetase                                  | -     | -     | -     | -    | -    | -    | 2    | 1      | -      | 1                                                        | -    | -    | -    | -    | -      | -      | 1      | -                                                       | 1         | -          | 1          | 2 |
|                 | COG0130                                              | TruB COG0130 271 Pseudouridine synthase                                    | -     | -     | -     | -    | -    | -    | -    | 1      | -      | -                                                        | -    | -    | -    | -    | -      | -      | 1      | -                                                       | -         | 1          | 1          | 2 |
|                 | COG0143                                              | MetG COG0143 558 Methionyl-tRNA synthetase                                 | 2     | 1     | 1     | -    | -    | -    | -    | 1      | -      | 2                                                        | 1    | -    | 1    | -    | -      | 1      | -      | 1                                                       | 1         | -          | 1          | 1 |
|                 | COG0164                                              | RnhB COG0164 199 Ribonuclease HII                                          | 2     | 2     | -     | 1    | 1    | -    | -    | -      | 2      | -                                                        | 1    | 1    | 1    | -    | -      | -      | 2      | -                                                       | -         | -          | 1          | 2 |
|                 | COG0177                                              | Nth COG0177 211 Predicted EndoII-related endonuclease                      | 1     | -     | -     | 1    | 1    | 1    | -    | 1      | 1      | 1                                                        | 1    | 1    | 1    | 1    | -      | 1      | 1      | 1                                                       | 1         | 1          | 1          | 2 |
|                 | COG0180                                              | TrpS COG0180 314 Tryptophanyl-tRNA synthetase                              | 1     | -     | 1     | -    | 1    | 1    | 1    | 1      | 1      | -                                                        | 3    | 1    | 1    | 1    | 1      | 1      | 1      | 1                                                       | -         | 1          | 1          | 1 |
|                 | COG0186                                              | RpsQ COG0186 87 Ribosomal protein S17                                      | 6     | 1     | 1     | -    | 1    | -    | -    | 1      | -      | 3                                                        | 1    | 2    | 1    | -    | -      | 1      | -      | 1                                                       | 1         | 1          | 1          | 2 |
|                 | COG0197                                              | RplP COG0197 146 Ribosomal protein L16/L10E                                | 5     | 2     | -     | -    | 1    | 1    | -    | -      | 1      | -                                                        | 1    | 1    | 1    | 1    | -      | -      | 1      | -                                                       | -         | -          | 1          | 2 |
|                 | COG0200                                              | RplO COG0200 152 Ribosomal protein L15                                     | 6     | 1     | 1     | -    | 1    | -    | -    | 1      | 1      | 3                                                        | 1    | 2    | 1    | -    | -      | -      | 1      | 1                                                       | 1         | 1          | 1          | 2 |
|                 | COG0201                                              | SecY COG0201 436 Preprotein translocase subunit SecY                       | 5     | 1     | 1     | -    | -    | -    | -    | 1      | 1      | 3                                                        | 1    | 2    | 1    | -    | -      | -      | 1      | 1                                                       | 1         | 1          | 1          | 2 |
|                 | COG0250                                              | NusG COG0250 178 Transcription antiterminator                              | 1     | 1     | -     | -    | -    | 1    | -    | 1      | -      | -                                                        | 1    | 2    | 1    | 1    | -      | 1      | 1      | -                                                       | -         | -          | 1          | 2 |
|                 | COG0256                                              | RplR COG0256 125 Ribosomal protein L18                                     | 6     | 1     | 1     | -    | 1    | -    | -    | 1      | 1      | 3                                                        | 1    | 2    | 1    | -    | -      | -      | 1      | 1                                                       | 1         | 1          | 1          | 1 |
|                 | COG0441                                              | ThrS COG0441 589 Threonyl-tRNA synthetase                                  | 1     | -     | 1     | -    | -    | -    | -    | 3      | 1      | -                                                        | 1    | 1    | -    | -    | -      | 1      | 1      | -                                                       | 1         | 1          | 1          | 2 |
|                 | COG0459                                              | GroL COG0459 524 Chaperonin GroEL (HSP60 family)                           | 1     | -     | -     | -    | 1    | 1    | -    | 1      | 1      | 1                                                        | 2    | 1    | 1    | 1    | -      | 1      | 2      | 1                                                       | 1         | 1          | 2          | 4 |
|                 | COG0468                                              | RecA COG0468 279 RecA/RadA recombinase                                     | 4     | -     | 2     | -    | 1    | 1    | 1    | 1      | 1      | 1                                                        | 1    | 2    | 1    | 1    | 1      | 2      | 1      | 1                                                       | 1         | 1          | 1          | 4 |
|                 | COG0480                                              | FusA COG0480 697 Translation elongation factors (GTPases)                  | 2     | -     | 1     | -    | -    | 1    | -    | 2      | 1      | -                                                        | 1    | 1    | 1    | 1    | -      | 1      | 1      | -                                                       | 1         | -          | 1          | 1 |
|                 | COG0495                                              | LeuS COG0495 814 Leucyl-tRNA synthetase                                    | 1     | 1     | -     | -    | -    | -    | -    | -      | -      | -                                                        | 1    | 1    | -    | -    | -      | -      | -      | -                                                       | 1         | 1          | 1          | 2 |
|                 | COG0522                                              | RpsD COG0522 205 Ribosomal protein S4 and related proteins                 | 2     | -     | -     | -    | -    | 1    | -    | -      | -      | 1                                                        | 2    | -    | -    | 1    | -      | -      | -      | 1                                                       | 1         | -          | 1          | 2 |
|                 | COG0525                                              | ValS COG0525 877 Valyl-tRNA synthetase                                     | -     | -     | 1     | -    | -    | -    | -    | -      | -      | 3                                                        | 1    | 1    | 1    | 1    | -      | -      | -      | 1                                                       | -         | 1          | 1          | 2 |
|                 | COG0532                                              | InfB COG0532 509 Translation initiation factor 2 (IF-2; GTPase)            | 1     | -     | 1     | -    | -    | -    | -    | -      | 1      | 1                                                        | 1    | 2    | 1    | 1    | 1      | -      | 1      | 1                                                       | -         | 1          | 1          | 1 |
