# Supplementary material
Source: PubMed Central journal article supplement (PMC5437922)
Supplement: ismej2016188x7.pdf [file ismej2016188x7.pdf]

Supplementary Table 5. Protein categories based on arCOG database.

|                                           |   | arCOG classification                  | gene       | product                                                                        | COG classification | pFAM domain         | cdc             | TIGR classification | Epipelagic CG-MGIII bins |      |      |      |      |      | Pelagic CG-MGIII bins |         | Other Euryarchaea |         |                  |
|-------------------------------------------|---|---------------------------------------|------------|--------------------------------------------------------------------------------|--------------------|---------------------|-----------------|---------------------|--------------------------|------|------|------|------|------|-----------------------|---------|-------------------|---------|------------------|
|                                           |   |                                       |            |                                                                                |                    |                     |                 |                     | Epi1                     | Epi2 | Epi3 | Epi4 | Epi5 | Epi6 | Bathy1                | Bathy-2 | A.bonei 1469      | MG2-GG3 | Thalassosarchaea |
| <b>INFORMATION STORAGE AND PROCESSING</b> |   |                                       |            |                                                                                |                    |                     |                 |                     |                          |      |      |      |      |      |                       |         |                   |         |                  |
| arCOG00415                                | L | Replication, recombination and repair | RecA       | RecA/RadA recombinase                                                          | COG00468           | pfam14520.pfam0842  | cd01123         | TIGR02236           | 1                        | 1    | 1    | 1    | 1    | 1    | 1                     | 1       | 1                 | 1       | 1                |
| arCOG00413                                | L | Replication, recombination and repair | -          | DNA topoisomerase VI, subunit A                                                | COG01697           | pfam04406           | cd00223         |                     | 1                        | 1    | 1    | 1    | 1    | 1    | 1                     | 1       | 1                 | 1       | 5                |
| arCOG04455                                | L | Replication, recombination and repair | HY52       | Archaeal DNA polymerase II, small subunit/DNA polymerase delta, subunit B      | COG01311           | pfam01336.pfam0404  | cd04490,cd07386 |                     | 1                        | 1    | 1    | 1    | 1    | 1    | 1                     | 1       | 1                 | 1       | 1                |
| arCOG00459                                | L | Replication, recombination and repair | Nth        | EndoIII-related endonuclease                                                   | COG00177           | pfam00730.pfam1057  | cd00056         | TIGR01083           | 1                        | 1    | 1    | 1    | 1    | 1    | 1                     | 1       | 2                 | 1       | 1                |
| arCOG00417                                | L | Replication, recombination and repair | RecA       | RecA/RadA recombinase                                                          | COG00468           |                     | cd01194         | TIGR02237           | 1                        | 1    | 1    | 1    | 1    | 2    | 1                     | 1       | 1                 | 1       | 1                |
| arCOG04367                                | L | Replication, recombination and repair | GyrA       | Type IIA topoisomerase (DNA gyrase/topo II, topoisomerase IV), A subunit       | COG00188           | pfam00521.pfam0398  | cd00187         | TIGR01063           | 1                        | 2    | 1    | 1    | 1    | 1    | 1                     | 1       | 1                 | 1       | 3                |
| arCOG00872                                | L | Replication, recombination and repair | MPH1       | ERCC4-like helicase                                                            | COG01111           | pfam00270.pfam0027  | cd00046,cd120   | TIGR00643,TIGR00644 | 1                        | 2    | 1    | 1    | 1    | 1    | 1                     | 1       | 1                 | 1       | 2                |
| arCOG04447                                | L | Replication, recombination and repair | -          | Archaeal DNA polymerase II, large subunit                                      | COG01933           | pfam03833.pfam09845 |                 | TIGR00354           | 1                        | 2    | 1    | 1    | 1    | 1    | 1                     | 1       | 1                 | 1       | 1                |
| arCOG00551                                | L | Replication, recombination and repair | -          | DNA replication initiation complex subunit, GINS15 family                      | COG01711           |                     | cd11714         |                     | 1                        |      | 1    |      |      | 1    | 1                     | 1       | 1                 |         |                  |
| arCOG04990                                | L | Replication, recombination and repair | -          | Predicted endonuclease, contains HTH and PD-DEK nuclease domains               |                    | pfam14811           |                 |                     |                          |      | 1    |      |      | 1    | 1                     | 1       | 1                 | 1       | 2                |
| arCOG00467                                | L | Replication, recombination and repair | CDC6       | Cdc6-related protein, AAA superfamily ATPase                                   | COG01474           | pfam13401.pfam0907  | cd00009,cd087   | TIGR02928           | 2                        | 1    | 1    | 1    |      | 1    | 1                     | 1       | 1                 | 2       | 6                |
| arCOG02610                                | L | Replication, recombination and repair | ScpA       | Chromatin segregation and condensation protein Rec8/ScpA/Sccl1, kleisin fam    | COG01354           | pfam02616           |                 |                     |                          | 1    |      |      |      | 1    | 1                     | 1       | 1                 | 1       | 2                |
| arCOG00439                                | L | Replication, recombination and repair | MCM2       | Predicted ATPase involved in replication control, Cdc46/Mcm family             | COG01241           | pfam14551.pfam0049  | cd00009         |                     |                          |      | 1    | 1    | 1    | 1    | 1                     | 1       | 1                 | 1       | 2                |
| arCOG00427                                | L | Replication, recombination and repair | RecJ/Cdc45 | Single-stranded DNA-specific exonuclease RecJ                                  | COG00608           |                     |                 |                     |                          |      | 1    | 1    | 1    | 1    | 1                     | 1       | 1                 | 1       | 2                |
| arCOG02258                                | L | Replication, recombination and repair | -          | RPA family protein, a subunit of RPA complex in P.furiosus                     | COG03390           |                     |                 |                     | 1                        | 1    | 1    | 1    | 1    | 1    | 1                     | 1       | 1                 | 1       | 3                |
| arCOG04582                                | L | Replication, recombination and repair | Dpo4/DinP  | Family Y DNA polymerase                                                        | COG00389           | pfam00817.pfam1179  | cd03586         |                     | 1                        | 1    | 1    | 1    | 1    | 1    | 1                     | 1       | 1                 | 1       | 1                |
| arCOG01166                                | L | Replication, recombination and repair | MutL       | DNA mismatch repair enzyme (predicted ATPase)                                  | COG00323           | pfam13589.pfam0111  | cd00075,cd007   | TIGR00585           | 1                        | 1    | 1    | 1    |      | 1    | 1                     | 1       | 1                 | 2       |                  |
| arCOG01165                                | L | Replication, recombination and repair | -          | DNA topoisomerase VI, subunit B                                                | COG01389           | pfam00218.pfam0348  | cd00075,cd008   | TIGR01052           | 1                        | 1    | 1    | 1    |      | 1    | 1                     | 1       | 1                 | 4       |                  |
| arCOG01486                                | L | Replication, recombination and repair | RnmV       | 5S rRNA maturation endonuclease (Ribonuclease M5), contains TOPRIM dom         | COG01658           | pfam01751           | cd01027         |                     | 1                        | 1    | 1    |      | 1    | 1    | 1                     | 1       | 1                 | 1       | 1                |
| arCOG04121                                | L | Replication, recombination and repair | RnhB       | Ribonuclease HII                                                               | COG00164           | pfam01351           | cd07180         | TIGR00729           | 1                        | 1    | 1    |      |      | 1    | 1                     | 1       | 1                 | 2       |                  |
| arCOG00470                                | L | Replication, recombination and repair | HolB       | ATPase involved in DNA replication HolB, large subunit                         | COG00470           | pfam00004           | cd00009         | TIGR02397           | 1                        | 2    | 1    | 1    | 1    |      | 1                     | 1       | 1                 | 1       | 1                |
| arCOG04371                                | L | Replication, recombination and repair | GyrB       | Type IIA topoisomerase (DNA gyrase/topo II, topoisomerase IV), B subunit       | COG00187           | pfam00218.pfam0020  | cd00075,cd008   | TIGR01059           | 1                        | 2    | 1    | 1    |      | 1    | 1                     | 1       | 1                 | 3       |                  |
| arCOG04110                                | L | Replication, recombination and repair | PR1        | Eukaryotic-type DNA primase, catalytic (small) subunit                         | COG01467           | pfam01896           | cd04860         | TIGR00335           | 1                        | 2    | 2    |      |      | 1    | 1                     | 1       | 2                 | 5       |                  |
| arCOG00488                                | L | Replication, recombination and repair | DnaN       | DNA polymerase sliding clamp subunit (PCNA homolog)                            | COG00592           | pfam00705.pfam0274  | cd00577         | TIGR00590           | 1                        |      | 1    | 1    | 1    | 1    | 1                     | 1       | 1                 | 2       |                  |
| arCOG01078                                | L | Replication, recombination and repair | -          | NUDIX family hydrolase                                                         | COG00494           | pfam00293           | cd03428         |                     |                          | 1    | 1    |      |      | 1    | 1                     | 2       | 1                 | 1       | 1                |
| arCOG00787                                | L | Replication, recombination and repair | -          | UvrD/Rep family helicase fused to exonuclease family domain                    | COG02887           | pfam12705           | cd09637         | TIGR01249,TIGR00372 |                          |      | 1    |      |      | 1    | 1                     | 1       | 1                 | 2       |                  |
| arCOG01527                                | L | Replication, recombination and repair | TopA       | Topoisomerase IA                                                               | COG00550           | pfam01751.pfam0113  | cd03362,cd001   | TIGR01057           |                          |      |      |      |      | 1    | 1                     | 1       | 1                 | 2       |                  |
| arCOG04050                                | L | Replication, recombination and repair | FEN1       | 5'-3' exonuclease                                                              | COG00258           | pfam00752.pfam0086  | cd09867         | TIGR03674           |                          |      |      |      |      | 1    | 1                     | 1       | 1                 | 2       |                  |
| arCOG00558                                | L | Replication, recombination and repair | SrmB       | Superfamily II DNA and RNA helicase                                            | COG00513           | pfam00270.pfam0027  | cd00268,cd000   | TIGR01389           |                          |      |      |      |      | 1    | 1                     | 3       | 3                 |         |                  |
| arCOG00129                                | L | Replication, recombination and repair | -          | DNA modification methylase                                                     | COG00863           | pfam01555.pfam01555 |                 | TIGR01177           |                          |      |      |      |      | 1    | 1                     | 1       |                   |         |                  |
| arCOG00328                                | L | Replication, recombination and repair | PolB3      | DNA polymerase PolB3                                                           | COG00417           | pfam03104.pfam0013  | cd05781,cd055   | TIGR00592           | 1                        | 1    |      |      |      | 2    | 1                     | 2       | 1                 | 4       |                  |
| arCOG00905                                | L | Replication, recombination and repair | -          | Uracil-DNA glycosylase                                                         | COG01573           | pfam03167           | cd10031         | TIGR00758           |                          |      |      |      |      | 2    | 1                     | 2       |                   |         |                  |
| arCOG01510                                | L | Replication, recombination and repair | RPA1       | Single-stranded DNA-binding replication protein A (RPA), large (70 kD) subunit | COG01599           |                     | cd04491,cd04491 |                     | 2                        | 3    | 2    | 2    | 1    | 2    | 2                     | 3       | 2                 | 3       |                  |
| arCOG01072                                | L | Replication, recombination and repair | -          | NUDIX family hydrolase                                                         | COG00494           | pfam00293           | cd03426         |                     | 1                        | 1    | 1    | 1    |      | 1    | 2                     |         |                   |         |                  |
| arCOG03013                                | L | Replication, recombination and repair | PR12       | Eukaryotic-type DNA primase, large subunit                                     | COG02219           | pfam04104           | cd06560         |                     | 1                        | 1    | 1    |      |      | 2    |                       | 1       | 1                 | 1       | 1                |
| arCOG00469                                | L | Replication, recombination and repair | HolB       | ATPase involved in DNA replication HolB, small subunit                         | COG00470           | pfam13177.pfam0854  | cd00009         | TIGR02397           | 1                        | 1    | 1    |      |      | 1    | 1                     | 2       | 2                 |         |                  |
| arCOG00553                                | L | Replication, recombination and repair | BRR2       | Replicative superfamily II helicase                                            | COG01204           | pfam00270.pfam0027  | cd00046,cd000   | TIGR04121           | 2                        | 3    | 1    | 2    | 1    | 3    | 1                     | 1       | 1                 | 4       |                  |
| arCOG01894                                | L | Replication, recombination and repair | Nfo        | Endonuclease IV                                                                | COG00648           | pfam01261           | cd00019         | TIGR00587           | 1                        | 1    | 1    |      | 1    |      | 1                     | 1       | 1                 | 4       |                  |
| arCOG01526                                | L | Replication, recombination and repair | TopG2      | Reverse gyrase                                                                 | COG01110           | pfam00270.pfam0175  | cd00046,cd033   | TIGR01054           | 1                        | 2    | 1    | 1    |      |      | 1                     | 1       | 1                 | 2       |                  |
| arCOG00464                                | L | Replication, recombination and repair | AlkA       | 3-methyladenine DNA glycosylase/8-oxoguanine DNA glycosylase                   | COG00122           | pfam07934.pfam0073  | cd00056         | TIGR00588           | 1                        |      | 1    |      |      | 1    | 1                     | 1       | 1                 | 1       |                  |
| arCOG03142                                | L | Replication, recombination and repair | -          | Nuclease of RNase H fold, RuvC/YagF family                                     |                    |                     |                 |                     | 1                        |      | 1    |      |      | 1    | 1                     | 1       | 1                 | 1       | 1                |
| arCOG00368                                | L | Replication, recombination and repair | SbcC       | ATPase involved in DNA repair, SbcC                                            | COG00419           | pfam13476.pfam1351  | cd03240,cd001   | TIGR00611,TIGR02168 |                          | 1    |      |      |      | 1    | 1                     | 3       |                   |         |                  |
| arCOG02897                                | L | Replication, recombination and repair | MutS       | Mismatch repair ATPase (MutS family)                                           | COG00249           | pfam01624.pfam0518  | cd03284         | TIGR01070           |                          |      |      |      | 2    |      | 1                     | 1       | 1                 | 1       | 1                |
| arCOG02724                                | L | Replication, recombination and repair | Ada        | Methylated DNA-protein cysteine methyltransferase                              | COG00350           | pfam01035           | cd06445         | TIGR00589           |                          |      | 1    |      |      |      | 1                     | 1       | 1                 | 1       | 1                |
| arCOG00397                                | L | Replication, recombination and repair | SbcD       | DNA repair exonuclease, SbcD                                                   | COG00420           | pfam00149           | cd00840         |                     |                          |      |      |      |      |      | 1                     | 2       |                   |         |                  |
| arCOG02257                                | L | Replication, recombination and repair | -          | RPA family protein, a subunit of RPA complex in P.furiosus                     | COG03390           |                     |                 |                     |                          |      |      |      |      |      | 1                     |         |                   |         |                  |
| arCOG08649                                | L | Replication, recombination and repair | -          | Topoisomerase IB                                                               | COG03569           | pfam02919.pfam0102  | cd00660,cd00659 |                     | 1                        | 1    |      | 1    |      |      |                       |         | 1                 |         |                  |
| arCOG04281                                | L | Replication, recombination and repair | DnaG       | DNA primase (bacterial type)                                                   | COG00358           | pfam13662           | cd01029         | TIGR01391           | 1                        | 2    |      |      |      |      |                       |         | 1                 | 1       | 2                |
| arCOG01073                                | L | Replication, recombination and repair | -          | NUDIX family hydrolase                                                         | COG00494           | pfam00293           | cd03424         | TIGR00052           | 1                        |      |      | 1    |      |      |                       |         | 1                 |         |                  |
| arCOG01347                                | L | Replication, recombination and repair | CDC9       | ATP-dependent DNA ligase                                                       | COG01793           | pfam04675.pfam0106  | cd07901,cd079   | TIGR00574           | 1                        |      |      |      |      |      |                       |         | 1                 |         |                  |
| arCOG02840                                | L | Replication, recombination and repair | PhrB       | Deoxyribodipyrimidine photolyase                                               | COG00415           | pfam00875.pfam03441 |                 | TIGR03556           | 2                        | 3    | 1    |      |      |      |                       |         | 2                 | 7       |                  |
| arCOG05109                                | L | Replication, recombination and repair | DnaQ       | DNA polymerase III, epsilon subunit or related 3'-5' exonuclease               | COG00847           | pfam00929           | cd06127         | TIGR00573           |                          | 1    |      |      |      |      |                       |         | 1                 |         |                  |
| arCOG00890                                | L | Replication, recombination and repair | -          | DNA modification methylase                                                     | COG00863           | pfam01555           |                 |                     |                          | 1    |      |      |      |      |                       |         |                   |         |                  |
| arCOG01898                                | L | Replication, recombination and repair | Uve        | UV damage repair endonuclease                                                  | COG04294           | pfam03851           |                 | TIGR00629           |                          | 1    |      |      |      |      |                       |         |                   |         |                  |
| arCOG00115                                | L | Replication, recombination and repair | -          | DNA modification methylase                                                     | COG00863           | pfam01555           |                 |                     |                          |      |      |      |      |      |                       |         | 1                 | 1       | 1                |
| arCOG00792                                | L | Replication, recombination and repair | -          | Superfamily I DNA/RNA helicase                                                 | COG01112           | pfam13086.pfam13087 |                 | TIGR00376           |                          |      |      |      |      |      |                       |         | 1                 | 1       | 1                |
| arCOG00919                                | L | Replication, recombination and repair | -          | Holliday junction resolvase, archaeal type                                     | COG01591           | pfam01870           | cd00523         |                     |                          |      |      |      |      |      |                       |         | 1                 | 1       | 2                |
| arCOG02207                                | L | Replication, recombination and repair | XthA       | Exonuclease III                                                                | COG00708           | pfam03372           | cd09073         | TIGR00633           |                          |      |      |      |      |      |                       |         | 1                 | 1       | 2                |
| arCOG00048                                | L | Replication, recombination and repair | RlmL       | 23S rRNA G2445 N2-methylase RlmL                                               | COG01116           | pfam02926.pfam0117  | cd11715         | TIGR01177           |                          |      |      |      |      |      |                       |         | 1                 |         |                  |
| arCOG00426                                | L | Replication, recombination and repair | RecJ       | DH1 superfamily phosphohydrolase/exonuclease                                   | COG00608           | pfam01368           |                 |                     |                          |      |      |      |      |      |                       |         | 1                 |         |                  |
| arCOG00463                                | L | Replication, recombination and repair | -          | Uri superfamily endonuclease                                                   | COG01833           | pfam01986           | cd10441         |                     |                          |      |      |      |      |      |                       |         | 1                 |         |                  |
| arCOG00928                                | L | Replication, recombination and repair | -          | Endonuclease V homolog                                                         | COG01628           | pfam01949           |                 |                     |                          |      |      |      |      |      |                       |         | 1                 |         |                  |
| arCOG01074                                | L | Replication, recombination and repair | -          | NUDIX family hydrolase                                                         | COG00494           | pfam00293           | cd03427         | TIGR02705           |                          |      |      |      |      |      |                       |         | 1                 |         |                  |
| arCOG04206                                | L | Replication, recombination and repair | MUS81      | ERCC4-type nuclease                                                            | COG01948           | pfam02732.pfam12826 |                 | TIGR00596           |                          |      |      |      |      |      |                       |         | 1                 |         |                  |
| arCOG04295                                | L | Replication, recombination and repair | Mpg        | 3-methyladenine DNA glycosylase                                                | COG02094           | pfam02245           | cd00540         | TIGR00567           |                          |      |      |      |      |      |                       |         | 1                 |         |                  |
| arCOG04357                                | L | Replication, recombination and repair | ENDO3c     | Thermotable 8-oxoguanine DNA glycosylase                                       | COG01059           | pfam00730           | cd00056         |                     |                          |      |      |      |      |      |                       |         | 1                 |         |                  |
| arCOG04926                                | L | Replication, recombination and repair | PolB       | DNA polymerase elongation subunit (family B)                                   | COG00417           |                     |                 |                     |                          |      |      |      |      |      |                       |         | 1                 |         |                  |
| arCOG05336                                | L | Replication, recombination and repair | HimA       | Bacterial nucleoid DNA-binding protein                                         | COG00776           | pfam00216           | cd13831         | TIGR00987           |                          |      |      |      |      |      |                       |         | 1                 |         |                  |
| arCOG06233                                | L | Replication, recombination and repair | -          | Toprim domain and Zn-finger domain                                             |                    | pfam01751.pfam0113  | cd03362,cd001   | TIGR01057           |                          |      |      |      |      |      |                       |         | 1                 |         |                  |
| arCOG06670                                | L | Replication, recombination and repair | -          | Nuclease-related protein, NERD family                                          |                    | pfam08378           |                 |                     |                          |      |      |      |      |      |                       |         | 1                 |         |                  |
| arCOG14866                                | L | Replication, recombination and repair | -          | HHH domain containing DNA-binding domain                                       |                    | pfam12836           |                 |                     |                          |      |      |      |      |      |                       |         | 1                 |         |                  |
| arCOG00280                                | L | Replication, recombination and repair | -          | HerA helicase                                                                  | COG00433           | pfam01935           |                 |                     |                          |      |      |      |      |      |                       |         | 2                 |         |                  |
| arCOG01290                                | L | Replication, recombination and repair | SpIB       | DNA repair photolyase                                                          | COG01533           | pfam04055           | cd01335         |                     |                          |      |      |      |      |      |                       |         | 2                 |         |                  |
| arCOG00329                                | L | Replication, recombination and repair | PolB2      | DNA polymerase PolB2, inactivated                                              | COG00417           | pfam00136           | cd05531         | TIGR00592           |                          |      |      |      |      |      |                       |         | 1                 | 1       | 1                |
| arCOG00802                                | L | Replication, recombination and repair | RecB       | ATP-dependent exoDNase (exonuclease V) beta subunit (contains helicase an      | COG01074           | p                   |                 |                     |                          |      |      |      |      |      |                       |         |                   |         |                  |

[illegible]

[illegible]

|            |   |                                                 |         |                                                                           |          |                                 |                  |                      |   |   |   |   |   |   |   |   |   |   |   |
|------------|---|-------------------------------------------------|---------|---------------------------------------------------------------------------|----------|---------------------------------|------------------|----------------------|---|---|---|---|---|---|---|---|---|---|---|
| arCOG00721 | J | Translation, ribosomal structure and biogenesis | Nob1    | Endonuclease Nob1, consists of a PIN domain and a Zn-ribbon module        | COG01439 |                                 | cd09876          |                      | 1 |   |   |   |   |   | 1 |   | 1 | 1 | 1 |
| arCOG00078 | J | Translation, ribosomal structure and biogenesis | NOP1    | Fibrillar-like rRNA methylase                                             | COG01889 | pfam01269                       |                  |                      | 1 | 1 | 1 |   |   |   |   |   | 1 | 1 | 1 |
| arCOG00906 | J | Translation, ribosomal structure and biogenesis | Nop10   | rRNA maturation protein Nop10, contains Zn-ribbon domain                  | COG02260 | pfam04135                       |                  |                      | 1 | 1 |   | 1 | 1 | 1 | 1 |   | 1 | 1 | 2 |
| arCOG00414 | J | Translation, ribosomal structure and biogenesis | Pcc1    | Subunit of KEOPS complex (Cgi121BUD32KAE1)                                | COG02892 |                                 |                  |                      | 1 |   | 1 |   | 1 |   | 1 |   | 1 |   |   |
| arCOG01741 | J | Translation, ribosomal structure and biogenesis | PelA    | Release factor eRF1                                                       | COG01537 | pfam03463, pfam03464, pfam03465 | TIGR00111        |                      | 1 | 2 | 1 | 1 | 1 | 1 | 1 | 1 | 1 | 1 | 2 |
| arCOG00040 | J | Translation, ribosomal structure and biogenesis | PheS    | Phenylalanyl-tRNA synthetase alpha subunit                                | COG00016 | pfam01409                       | cd00496          | TIGR00468            | 1 | 2 | 1 |   |   |   | 1 | 1 | 1 | 1 | 1 |
| arCOG00412 | J | Translation, ribosomal structure and biogenesis | PheT    | Phenylalanyl-tRNA synthetase beta subunit                                 | COG00072 | pfam03483, pfam03488            | cd00769          | TIGR00471            | 1 | 2 | 1 |   | 1 | 1 | 1 | 1 | 1 | 1 | 2 |
| arCOG00784 | J | Translation, ribosomal structure and biogenesis | POP4    | RNase P/RNase MRP subunit p29                                             | COG01588 | pfam01868                       |                  |                      | 1 | 2 | 1 |   |   |   |   | 1 | 1 |   | 2 |
| arCOG01365 | J | Translation, ribosomal structure and biogenesis | POP5    | RNase P/RNase MRP subunit POP5                                            | COG01369 | pfam01900                       |                  |                      |   |   |   |   |   |   |   |   | 1 |   |   |
| arCOG00402 | J | Translation, ribosomal structure and biogenesis | ProS    | Prolyl-tRNA synthetase                                                    | COG00442 | pfam00587, pfam0312             | cd00778, cd008   | TIGR00408            | 1 | 1 | 1 | 1 | 1 | 1 | 1 | 1 | 1 | 1 | 3 |
| arCOG04228 | J | Translation, ribosomal structure and biogenesis | Pth2    | Peptidyl-tRNA hydrolase                                                   | COG01990 | pfam01981                       | cd02430          | TIGR00283            | 1 | 1 | 1 | 1 |   |   | 1 | 1 | 2 | 2 |   |
| arCOG01015 | J | Translation, ribosomal structure and biogenesis | Pus10   | tRNA U54 and U55 pseudouridine synthase Pus10                             | COG01258 |                                 |                  | TIGR01213            | 1 | 3 | 1 | 1 | 1 | 1 | 1 | 1 | 1 | 1 | 1 |
| arCOG13558 | J | Translation, ribosomal structure and biogenesis | QueA    | S-adenosylmethionine:tRNA ribosyltransferase-isomerase                    |          | pfam02547                       |                  | TIGR00113            |   |   |   |   |   |   |   |   | 1 |   |   |
| arCOG00039 | J | Translation, ribosomal structure and biogenesis | QueC    | 7-cyano-7-deazaguanine synthase (queuosine biosynthesis)                  | COG00603 | pfam06508                       | cd01995          | TIGR00364            |   |   |   | 1 |   |   |   | 1 | 1 | 1 | 1 |
| arCOG04210 | J | Translation, ribosomal structure and biogenesis | QueFC   | NADPH-dependent 7-cyano-7-deazaguanine reductase QueF, C-terminal dom     | COG00780 | pfam14489                       |                  | TIGR03139            |   |   |   |   |   |   |   |   | 1 |   |   |
| arCOG04125 | J | Translation, ribosomal structure and biogenesis | RCL1    | RNA 3'-terminal phosphate cyclase                                         | COG00430 | pfam01137                       | cd00874          | TIGR03399            |   |   |   |   |   |   |   |   | 1 |   |   |
| arCOG00842 | J | Translation, ribosomal structure and biogenesis | RimL    | Acetyltransferase, RimL family                                            | COG01670 | pfam13302                       |                  |                      | 1 | 1 |   |   |   |   |   | 1 | 1 |   |   |
| arCOG00187 | J | Translation, ribosomal structure and biogenesis | RliI    | Translation initiation factor RLI1, contains Fe-S and AAA+ ATPase domains | COG01245 | pfam00005, pfam0000             | cd03237, cd032   | TIGR03269            | 1 | 2 | 1 | 1 |   | 1 | 1 | 1 | 1 | 1 | 6 |
| arCOG05111 | J | Translation, ribosomal structure and biogenesis | RlmH    | 23S rRNA pseudoU1915 N3-methylase RlmH                                    | COG01576 | pfam02590                       |                  | TIGR00246            |   |   |   |   |   |   |   |   | 1 | 1 |   |
| arCOG06660 | J | Translation, ribosomal structure and biogenesis | RluA    | Pseudouridylylase, 23S RNA-specific                                       | COG00564 | pfam00849                       | cd02869          | TIGR00005            |   |   |   |   |   |   |   |   | 1 | 1 | 2 |
| arCOG00547 | J | Translation, ribosomal structure and biogenesis | RnjA    | mRNA degradation ribonuclease J1/J2                                       | COG00595 | pfam12706                       |                  | TIGR03675, TIGR02651 |   |   |   |   |   |   |   |   | 1 |   |   |
| arCOG00501 | J | Translation, ribosomal structure and biogenesis | Rnz     | Ribonuclease Z, beta-lactamase superfamily hydrolase                      | COG01234 | pfam12706                       |                  | TIGR02651            | 1 | 1 |   | 1 |   |   |   |   | 1 | 1 | 2 |
| arCOG01575 | J | Translation, ribosomal structure and biogenesis | Rph     | Ribonuclease PH                                                           | COG00689 | pfam01138, pfam0372             | cd11366          | TIGR02065            | 1 | 1 | 1 | 1 | 1 |   | 1 | 2 | 2 | 4 |   |
| arCOG04209 | J | Translation, ribosomal structure and biogenesis | RPL15A  | Ribosomal protein L15E                                                    | COG01632 | pfam00827                       |                  |                      |   |   |   | 1 | 1 |   | 1 | 1 | 1 | 1 | 3 |
| arCOG00780 | J | Translation, ribosomal structure and biogenesis | RPL18A  | Ribosomal protein L18E                                                    | COG01727 | pfam00828                       |                  | TIGR01071            | 1 | 1 |   | 1 |   | 1 | 1 | 1 | 1 | 1 |   |
| arCOG04089 | J | Translation, ribosomal structure and biogenesis | RPL19A  | Ribosomal protein L19E                                                    | COG02147 | pfam01280                       | cd01418          |                      | 1 | 2 | 1 |   |   | 1 | 1 | 1 | 1 | 1 | 1 |
| arCOG04175 | J | Translation, ribosomal structure and biogenesis | RPL20A  | Ribosomal protein L20A (L18A)                                             | COG02157 | pfam01775                       |                  |                      |   |   |   |   |   |   |   |   | 1 | 1 |   |
| arCOG04129 | J | Translation, ribosomal structure and biogenesis | RPL21A  | Ribosomal protein L21E                                                    | COG02139 | pfam01157                       |                  |                      | 1 | 2 | 1 | 1 | 1 | 1 | 1 | 1 | 1 | 1 | 1 |
| arCOG01950 | J | Translation, ribosomal structure and biogenesis | RPL24A  | Ribosomal protein L24E                                                    | COG02075 | pfam01246                       | cd00472          |                      | 1 | 1 |   |   |   | 1 | 1 | 1 |   |   |   |
| arCOG01752 | J | Translation, ribosomal structure and biogenesis | RPL30   | Ribosomal protein L30E                                                    | COG01911 | pfam01248                       |                  |                      |   | 1 | 1 | 1 |   | 1 | 1 | 1 | 1 | 1 | 2 |
| arCOG04473 | J | Translation, ribosomal structure and biogenesis | RPL31A  | Ribosomal protein L31E                                                    | COG02097 | pfam01198                       | cd00463          |                      | 1 | 2 | 1 | 1 | 1 | 1 | 1 | 1 | 1 | 1 | 1 |
| arCOG00781 | J | Translation, ribosomal structure and biogenesis | RPL32   | Ribosomal protein L32E                                                    | COG01717 | pfam01655                       | cd00513          |                      | 1 | 2 | 1 |   |   | 1 | 1 | 1 | 1 | 1 | 1 |
| arCOG04177 | J | Translation, ribosomal structure and biogenesis | RPL39   | Ribosomal protein L39E                                                    | COG02167 | pfam00832                       |                  |                      |   |   |   |   |   |   |   |   | 1 |   | 1 |
| arCOG04049 | J | Translation, ribosomal structure and biogenesis | RPL40A  | Ribosomal protein L40E                                                    | COG01552 |                                 |                  |                      |   |   |   | 1 |   |   |   |   |   |   |   |
| arCOG04109 | J | Translation, ribosomal structure and biogenesis | RPL42A  | Ribosomal protein L44E                                                    | COG01631 | pfam00935                       |                  |                      | 1 | 1 |   | 1 | 1 | 1 | 1 | 1 | 1 | 2 |   |
| arCOG04208 | J | Translation, ribosomal structure and biogenesis | RPL43A  | Ribosomal protein L37AE/L43A                                              | COG01997 | pfam01780                       |                  | TIGR00280            | 1 | 1 | 1 |   |   |   | 1 | 1 | 1 | 2 |   |
| arCOG01751 | J | Translation, ribosomal structure and biogenesis | Rpl7Ae  | Ribosomal protein L7AE                                                    | COG01358 | pfam01248                       |                  | TIGR03677            | 1 | 1 |   |   | 1 | 1 | 1 | 1 | 1 | 1 | 1 |
| arCOG04289 | J | Translation, ribosomal structure and biogenesis | RplA    | Ribosomal protein L1                                                      | COG00081 | pfam00687                       | cd00403          | TIGR01169            | 1 | 1 | 1 |   |   | 1 | 1 | 1 | 1 | 2 |   |
| arCOG04067 | J | Translation, ribosomal structure and biogenesis | RplB    | Ribosomal protein L2                                                      | COG00090 | pfam01181, pfam03947            |                  | TIGR01171            | 1 | 1 | 1 |   | 1 |   | 1 | 1 | 1 | 2 |   |
| arCOG04070 | J | Translation, ribosomal structure and biogenesis | RplC    | Ribosomal protein L3                                                      | COG00087 | pfam00297                       |                  | TIGR03626            | 1 | 1 | 1 |   |   |   | 1 | 1 | 1 | 2 |   |
| arCOG04071 | J | Translation, ribosomal structure and biogenesis | RplD    | Ribosomal protein L4                                                      | COG00088 | pfam00573                       |                  | TIGR03672            | 1 | 1 | 1 |   |   |   |   | 1 | 1 | 2 |   |
| arCOG04092 | J | Translation, ribosomal structure and biogenesis | RplE    | Ribosomal protein L5                                                      | COG00094 | pfam00281, pfam00673            |                  |                      | 1 | 2 | 1 |   |   | 1 | 1 | 1 | 1 | 1 | 1 |
| arCOG04090 | J | Translation, ribosomal structure and biogenesis | RplF    | Ribosomal protein L6P                                                     | COG00097 | pfam00347, pfam00347            |                  | TIGR03653            | 1 | 2 | 1 |   |   | 1 | 1 | 1 | 1 | 1 | 1 |
| arCOG04288 | J | Translation, ribosomal structure and biogenesis | RplJ    | Ribosomal protein L10                                                     | COG00244 | pfam00466                       | cd05795          |                      | 1 | 1 | 1 |   |   | 1 | 1 | 1 | 1 | 2 |   |
| arCOG04372 | J | Translation, ribosomal structure and biogenesis | RplK    | Ribosomal protein L11                                                     | COG00080 | pfam03946, pfam0029             | cd00349          | TIGR01632            | 1 | 2 | 1 | 1 | 1 |   | 1 | 1 | 1 | 2 |   |
| arCOG04242 | J | Translation, ribosomal structure and biogenesis | RplM    | Ribosomal protein L13                                                     | COG00102 | pfam00572                       | cd00392          | TIGR01077            | 1 | 1 |   | 1 |   | 1 | 1 | 1 | 1 | 1 |   |
| arCOG04095 | J | Translation, ribosomal structure and biogenesis | RplN    | Ribosomal protein L14                                                     | COG00093 | pfam00238                       |                  | TIGR03673            | 1 | 2 | 1 |   |   | 1 | 1 | 1 | 1 | 2 |   |
| arCOG00779 | J | Translation, ribosomal structure and biogenesis | RplO    | Ribosomal protein L15                                                     | COG00200 | pfam00828                       |                  |                      | 1 | 2 | 1 |   |   | 1 | 1 | 1 | 1 | 1 | 1 |
| arCOG04113 | J | Translation, ribosomal structure and biogenesis | RplP    | Ribosomal protein L10AE/L16                                               | COG00197 | pfam00252                       | cd01433          | TIGR00279            | 1 | 1 | 1 | 1 |   | 1 | 1 | 1 | 1 | 1 | 1 |
| arCOG04088 | J | Translation, ribosomal structure and biogenesis | RplR    | Ribosomal protein L18                                                     | COG00256 | pfam00861, pfam1420             | cd04332          |                      | 1 | 2 | 1 |   |   | 1 | 1 | 1 | 1 | 1 | 1 |
| arCOG04098 | J | Translation, ribosomal structure and biogenesis | RplV    | Ribosomal protein L22                                                     | COG00091 | pfam00237                       | cd00336          |                      | 1 | 1 | 1 |   |   | 1 | 1 | 1 | 1 | 3 |   |
| arCOG04072 | J | Translation, ribosomal structure and biogenesis | RplW    | Ribosomal protein L23                                                     | COG00089 | pfam00276                       |                  | TIGR03636            | 1 | 1 | 1 |   |   | 1 | 1 | 1 | 1 | 2 |   |
| arCOG04094 | J | Translation, ribosomal structure and biogenesis | RplX    | Ribosomal protein L24                                                     | COG00198 |                                 | cd06089          | TIGR01080            | 1 | 2 | 1 |   |   | 1 | 1 | 1 |   | 2 |   |
| arCOG00785 | J | Translation, ribosomal structure and biogenesis | RpmC    | Ribosomal protein L29                                                     | COG02255 | pfam00831                       | cd00427          | TIGR00012            | 1 | 2 | 1 |   |   | 1 | 1 | 1 | 1 | 1 | 1 |
| arCOG04086 | J | Translation, ribosomal structure and biogenesis | RpmD    | Ribosomal protein L30                                                     | COG01841 |                                 | cd01657          | TIGR01309            | 1 | 2 | 1 |   |   | 1 | 1 | 1 | 1 | 1 | 1 |
| arCOG04287 | J | Translation, ribosomal structure and biogenesis | RPP1A   | Ribosomal protein L12E/L44/L45/RPP1/RPP2                                  | COG02058 | pfam00428                       | cd05832          | TIGR03685            | 1 | 1 | 1 |   |   | 1 | 1 | 1 | 1 | 2 |   |
| arCOG04345 | J | Translation, ribosomal structure and biogenesis | RPR2    | RNase P subunit RPR2                                                      | COG02023 | pfam04032                       |                  |                      |   | 1 |   | 1 |   |   | 1 | 1 | 1 | 1 | 1 |
| arCOG01885 | J | Translation, ribosomal structure and biogenesis | RPS17A  | Ribosomal protein S17E                                                    | COG01383 | pfam00833                       |                  |                      | 1 | 1 | 1 | 1 | 1 | 1 | 2 | 1 | 1 | 1 | 1 |
| arCOG01344 | J | Translation, ribosomal structure and biogenesis | RPS19A  | Ribosomal protein S19E (S16A)                                             | COG02238 | pfam01090                       |                  |                      | 1 | 2 | 1 | 1 | 1 | 1 | 1 | 1 | 1 | 1 | 1 |
| arCOG04186 | J | Translation, ribosomal structure and biogenesis | RPS1A   | Ribosomal protein S3AE                                                    | COG01890 | pfam01015                       |                  |                      | 1 |   |   |   |   |   | 1 | 1 | 1 | 1 | 3 |
| arCOG04182 | J | Translation, ribosomal structure and biogenesis | RPS24A  | Ribosomal protein S24E                                                    | COG02004 | pfam01282                       |                  |                      | 1 |   |   |   |   |   | 1 | 1 | 1 | 1 |   |
| arCOG04108 | J | Translation, ribosomal structure and biogenesis | RPS27A  | Ribosomal protein S27E                                                    | COG02051 | pfam01667                       |                  |                      | 1 | 1 |   | 1 | 1 | 1 | 1 |   | 1 |   | 1 |
| arCOG04183 | J | Translation, ribosomal structure and biogenesis | RPS27AE | Ribosomal protein S27AE                                                   | COG01998 |                                 |                  |                      | 1 |   |   |   |   |   |   |   | 1 |   |   |
| arCOG04314 | J | Translation, ribosomal structure and biogenesis | RPS28A  | Ribosomal protein S28E/S33                                                | COG02053 | pfam01200                       | cd04457          |                      | 1 | 1 |   |   |   | 1 | 1 | 1 | 1 | 1 | 1 |
| arCOG04093 | J | Translation, ribosomal structure and biogenesis | RPS4A   | Ribosomal protein S4E                                                     | COG01471 | pfam08071, pfam0147             | cd00165, cd06087 |                      | 1 | 2 | 1 |   |   | 1 | 1 | 1 | 1 | 2 |   |
| arCOG01946 | J | Translation, ribosomal structure and biogenesis | RPS6A   | Ribosomal protein S6E/S10                                                 | COG02125 | pfam01092                       |                  |                      | 1 |   | 1 | 1 |   |   | 1 | 1 | 1 | 1 | 3 |
| arCOG04154 | J | Translation, ribosomal structure and biogenesis | RPS8A   | Ribosomal protein S8E                                                     | COG02007 | pfam01201                       | cd11382          | TIGR00307            | 1 |   | 1 |   |   |   | 1 | 1 | 1 | 2 |   |
| arCOG04245 | J | Translation, ribosomal structure and biogenesis | RpsB    | Ribosomal protein S2                                                      | COG00052 | pfam00318                       | cd01425          | TIGR01012            |   | 1 |   | 1 | 1 | 1 | 1 | 1 | 1 | 2 |   |
| arCOG04097 | J | Translation, ribosomal structure and biogenesis | RpsC    | Ribosomal protein S3                                                      | COG00092 | pfam07650, pfam0018             | cd02411          | TIGR01008            | 1 | 2 | 1 |   |   | 1 | 1 | 1 | 1 | 2 |   |
| arCOG04239 | J | Translation, ribosomal structure and biogenesis | RpsD    | Ribosomal protein S4 or related protein                                   | COG00522 | pfam00163, pfam0147             | cd00165          | TIGR01018            | 1 |   |   | 1 |   |   | 1 | 1 | 1 | 1 | 1 |
| arCOG04087 | J | Translation, ribosomal structure and biogenesis | RpsE    | Ribosomal protein S5                                                      | COG00098 | pfam00333, pfam03719            |                  | TIGR01020            | 1 | 2 | 1 |   |   | 2 | 1 | 1 | 1 | 1 | 1 |
| arCOG04254 | J | Translation, ribosomal structure and biogenesis | RpsG    | Ribosomal protein S7                                                      | COG00049 | pfam00177                       | cd14867          | TIGR01028            | 1 | 1 | 1 | 1 | 1 | 1 | 1 | 1 | 1 | 1 | 1 |
| arCOG04091 | J | Translation, ribosomal structure and biogenesis | RpsH    | Ribosomal protein S8                                                      | COG00096 | pfam00410                       |                  |                      | 1 | 2 | 1 |   |   | 1 | 1 | 1 | 1 | 1 | 1 |
| arCOG04243 | J | Translation, ribosomal structure and biogenesis | RpsI    | Ribosomal protein S9                                                      | COG00103 | pfam00380                       |                  | TIGR03627            | 1 | 1 |   | 1 |   | 1 | 1 | 1 | 1 | 1 |   |
| arCOG01758 | J | Translation, ribosomal structure and biogenesis | RpsJ    | Ribosomal protein S10                                                     | COG00051 | pfam00338                       |                  | TIGR01046            | 1 | 1 |   |   |   | 1 | 1 | 1 | 1 | 2 |   |
| arCOG04240 | J | Translation, ribosomal structure and biogenesis | RpsK    | Ribosomal protein S11                                                     | COG00100 | pfam00411                       |                  | TIGR03628            | 1 |   |   | 1 |   |   | 1 | 1 | 1 | 1 | 1 |
| arCOG04255 | J | Translation, ribosomal structure and biogenesis | RpsL    | Ribosomal protein S12                                                     | COG00048 | pfam00164                       | cd03367          | TIGR00982            | 1 | 1 | 1 | 1 | 1 | 1 | 1 | 1 | 1 | 1 | 1 |
| arCOG01722 | J | Translation, ribosomal structure and biogenesis | RpsM    | Ribosomal protein S13                                                     | COG00099 | pfam00416                       |                  | TIGR03629            | 1 |   |   | 1 |   |   |   | 1 | 1 | 1 | 1 |
| arCOG00782 | J | Translation, ribosomal structure and biogenesis | RpsN    | Ribosomal protein S14                                                     | COG00199 | pfam00253                       |                  |                      | 1 | 1 | 1 |   |   | 1 |   | 1 |   |   |   |
| arCOG04185 | J | Translation, ribosomal structure and biogenesis | RpsO    | R                                                                         |          |                                 |                  |                      |   |   |   |   |   |   |   |   |   |   |   |

|            |   |                                                 |       |                                                                              |          |                                 |                |                      |           |   |   |   |   |   |   |   |   |   |   |   |
|------------|---|-------------------------------------------------|-------|------------------------------------------------------------------------------|----------|---------------------------------|----------------|----------------------|-----------|---|---|---|---|---|---|---|---|---|---|---|
| arCOG04099 | J | Translation, ribosomal structure and biogenesis | RpsS  | Ribosomal protein S19                                                        | COG00185 | pfam00203                       |                |                      | TIGR01025 | 1 | 1 | 1 |   | 1 | 1 |   | 1 | 1 | 1 | 2 |
| arCOG00678 | J | Translation, ribosomal structure and biogenesis | Rrp4  | Exosome complex RNA-binding protein Rrp4, contains S1 and KH domains         | COG01097 |                                 | cd05789        |                      |           | 1 | 1 | 1 |   | 1 | 1 |   | 1 | 1 | 1 |   |
| arCOG01574 | J | Translation, ribosomal structure and biogenesis | Rrp42 | Exosome complex RNA-binding protein Rrp42, RNase PH superfamily              | COG02123 | pfam01138, pfam0372             | cd11365        | TIGR01966            | 1         | 1 | 1 | 1 |   |   |   |   | 1 | 1 | 1 | 2 |
| arCOG04131 | J | Translation, ribosomal structure and biogenesis | RsmA  | 16S rRNA A1518 and A1519 N6-dimethyltransferase RsmA/KsgA/DIM1               | COG00030 | pfam00398                       |                | TIGR00755            | 1         | 1 | 1 | 1 |   |   |   |   | 1 | 1 | 1 | 1 |
| arCOG00973 | J | Translation, ribosomal structure and biogenesis | RsmB  | 16S rRNA C967 or C1407 C5-methylase, RsmB/RsmF family                        | COG00144 | pfam01189                       |                | TIGR00446            | 1         | 1 | 1 | 1 |   |   |   |   | 1 | 1 | 1 | 3 |
| arCOG00975 | J | Translation, ribosomal structure and biogenesis | RsmB  | 16S rRNA C967 or C1407 C5-methylase, RsmB/RsmF family                        | COG00144 | pfam01189                       | cd02440        | TIGR00446            |           |   |   |   |   |   |   |   | 1 |   |   |   |
| arCOG01239 | J | Translation, ribosomal structure and biogenesis | RsmE  | RNA base methyltransferase family enzyme                                     | COG01901 | pfam04013                       |                |                      | 1         | 2 | 1 | 1 |   |   |   |   | 1 | 1 | 1 | 1 |
| arCOG04246 | J | Translation, ribosomal structure and biogenesis | RtcB  | RNA 3'-P ligase, RtcB family protein                                         | COG01690 | pfam01139                       |                | TIGR03073            |           |   |   |   |   |   |   |   | 1 | 1 | 1 | 1 |
| arCOG04187 | J | Translation, ribosomal structure and biogenesis | Sdo1  | Ribosome maturation protein Sdo1                                             | COG01500 | pfam01172, pfam09377            |                | TIGR00291            | 1         | 1 | 1 | 1 |   |   |   |   | 1 | 1 | 1 | 1 |
| arCOG01564 | J | Translation, ribosomal structure and biogenesis | SeIB  | Selenocysteine-specific translation elongation factor or SeIB-II domain      | COG03276 |                                 | cd03696        | TIGR00475            | 1         | 1 |   |   |   |   |   |   | 1 | 1 | 3 |   |
| arCOG01701 | J | Translation, ribosomal structure and biogenesis | SEN2  | tRNA splicing endonuclease                                                   | COG01676 | pfam02778, pfam01974            |                | TIGR00324            | 1         |   | 1 | 1 |   |   |   |   | 1 | 1 | 1 | 5 |
| arCOG00403 | J | Translation, ribosomal structure and biogenesis | SerS  | Seryl-tRNA synthetase                                                        | COG00172 | pfam02403, pfam0058             | cd00770        | TIGR00414            |           |   |   | 1 |   | 1 | 1 |   | 1 | 1 | 1 | 1 |
| arCOG01923 | J | Translation, ribosomal structure and biogenesis | SIK1  | RNA processing factor Prp31, contains Nop domain                             | COG01498 | pfam01798                       |                |                      | 1         | 1 | 1 | 1 |   |   | 1 |   | 1 | 1 | 1 | 2 |
| arCOG01952 | J | Translation, ribosomal structure and biogenesis | SUA5  | tRNA A37 threonylcarbamoyladenosine synthetase subunit TsaC/SUA5/YrdC        | COG00009 | pfam01300                       |                | TIGR00057            | 1         | 2 | 1 | 1 | 1 |   | 2 |   | 1 | 1 | 1 | 1 |
| arCOG04223 | J | Translation, ribosomal structure and biogenesis | SUI1  | Translation initiation factor 1 (eIF-1/SUI1)                                 | COG00023 | pfam01253                       | cd11567        | TIGR01158            | 1         | 2 | 1 | 1 | 1 |   |   |   | 1 | 1 | 1 | 2 |
| arCOG04107 | J | Translation, ribosomal structure and biogenesis | SUI2  | Translation initiation factor 2, alpha subunit (eIF-2alpha)                  | COG01093 | pfam00575, pfam0754             | cd04452        | TIGR00717            | 1         | 1 |   | 1 | 1 | 1 | 1 |   | 1 | 1 | 1 | 2 |
| arCOG00056 | J | Translation, ribosomal structure and biogenesis | Tan1  | tRNA(Ser,Leu) C12 N-acetylase TAN1, contains THUMP domain                    | COG01818 | pfam02926, pfam1441             | cd11718, cd061 | TIGR00342            |           |   |   |   |   |   |   |   | 1 |   |   |   |
| arCOG01630 | J | Translation, ribosomal structure and biogenesis | TdcF  | Translation initiation inhibitor, yjgF family                                | COG00251 | pfam01042                       | cd00448        | TIGR00004            | 2         | 2 | 2 |   |   |   | 1 | 3 | 2 |   |   |   |
| arCOG01561 | J | Translation, ribosomal structure and biogenesis | TEF1  | Translation elongation factor EF-1 alpha, GTPase                             | COG05256 | pfam00009, pfam0314             | cd01883, cd036 | TIGR00483            | 1         | 1 | 1 | 1 |   |   | 1 | 1 |   | 1 | 1 | 5 |
| arCOG00989 | J | Translation, ribosomal structure and biogenesis | Tgt   | Queuine/archaeosine tRNA-ribosyltransferase                                  | COG00343 | pfam01702                       |                | TIGR00432            |           |   |   |   |   |   |   |   |   |   |   |   |
| arCOG00038 | J | Translation, ribosomal structure and biogenesis | Thil  | tRNA S1(4U) 4-thiouridine synthase                                           | COG00301 | pfam02926, pfam0256             | cd11716, cd017 | TIGR00342, TIGR04271 |           |   |   | 1 |   |   |   |   | 1 | 2 | 2 | 2 |
| arCOG00401 | J | Translation, ribosomal structure and biogenesis | ThrS  | Threonyl-tRNA synthetase                                                     | COG00441 | pfam00587, pfam0312             | cd00771, cd008 | TIGR00418            | 1         | 1 |   |   |   | 1 | 1 | 1 | 1 | 1 | 1 | 4 |
| arCOG01115 | J | Translation, ribosomal structure and biogenesis | TiaS  | tRNA(lle)2 2-azmatinylcytidine synthetase; containing Zn-ribbon domain and   | COG01571 | pfam08489, pfam0728             | cd04482        | TIGR03280            | 1         | 1 |   | 1 | 1 |   |   |   | 1 | 1 | 1 | 1 |
| arCOG04176 | J | Translation, ribosomal structure and biogenesis | TIF6  | Translation initiation factor 6 (eIF-6)                                      | COG01976 | pfam01912                       | cd00527        | TIGR00323            | 1         | 2 | 1 | 1 | 1 | 1 | 1 | 1 | 1 | 1 | 1 | 1 |
| arCOG00042 | J | Translation, ribosomal structure and biogenesis | TILS  | tRNA(lle)-lysine synthase TIS/MesI                                           | COG00037 | pfam01171                       | cd01993        | TIGR02432            | 1         | 1 |   | 1 |   |   |   |   | 2 | 1 | 1 | 3 |
| arCOG00985 | J | Translation, ribosomal structure and biogenesis | Tma20 | Predicted RNA-binding protein, contains PUA domain                           | COG02016 | pfam09183, pfam01472            |                | TIGR03684            | 1         | 1 |   |   |   | 1 | 1 | 1 | 1 | 1 | 1 | 2 |
| arCOG01951 | J | Translation, ribosomal structure and biogenesis | TmcA  | tRNA(Met) C34 N-acetyltransferase TmcA                                       | COG01444 | pfam08351, pfam05127, pfam13718 |                |                      |           |   |   |   |   |   |   |   | 1 |   |   |   |
| arCOG01219 | J | Translation, ribosomal structure and biogenesis | TRM1  | N2,N2-dimethylguanosine tRNA methyltransferase                               | COG01867 | pfam02005                       |                | TIGR00308            | 1         | 2 | 1 | 1 |   |   | 1 | 2 | 1 | 1 | 1 | 1 |
| arCOG00047 | J | Translation, ribosomal structure and biogenesis | Trm11 | tRNA G10 N-methylase Trm11                                                   | COG01041 | pfam01170                       |                | TIGR01177            | 1         |   |   | 1 |   |   |   |   | 1 | 1 | 1 | 2 |
| arCOG00033 | J | Translation, ribosomal structure and biogenesis | Trm5  | Wybutosine (yW) biosynthesis enzyme, Trm5 methyltransferase                  | COG02520 | pfam02475                       |                |                      | 2         | 1 | 1 | 2 | 1 |   |   |   | 1 | 2 | 1 | 2 |
| arCOG01018 | J | Translation, ribosomal structure and biogenesis | TrmJ  | tRNA C32,U32 (ribose-2'-O)-methylase TrmJ or a related methyltransferase     | COG00565 | pfam00588                       |                | TIGR00050            | 1         | 2 | 1 | 1 | 1 | 2 | 1 | 1 | 1 | 2 | 2 |   |
| arCOG01887 | J | Translation, ribosomal structure and biogenesis | TrpS  | Tryptophanyl-tRNA synthetase                                                 | COG00180 | pfam00579                       | cd00806        | TIGR00233            | 1         | 1 | 1 | 1 | 1 |   | 1 |   | 1 | 1 | 1 | 3 |
| arCOG04449 | J | Translation, ribosomal structure and biogenesis | TruA  | Pseudouridylylase synthase                                                   | COG00101 | pfam01416, pfam0141             | cd02866        | TIGR00071            | 1         | 1 | 1 | 1 |   |   |   |   | 1 | 1 | 2 |   |
| arCOG00987 | J | Translation, ribosomal structure and biogenesis | TruB  | Pseudouridine synthase                                                       | COG00130 | pfam08068, pfam0150             | cd02572        | TIGR00425            |           |   |   |   |   |   |   |   | 1 | 1 | 1 | 1 |
| arCOG04252 | J | Translation, ribosomal structure and biogenesis | TruD  | tRNA(Glu) U13 pseudouridine synthase TruD                                    | COG00585 | pfam01142                       | cd02577        | TIGR00094            | 1         | 2 | 1 | 1 |   | 1 | 2 |   | 1 | 1 | 1 | 1 |
| arCOG00761 | J | Translation, ribosomal structure and biogenesis | TsaA  | tRNA (Trp-GGU) A37 N-methylase                                               | COG01720 | pfam01980                       | cd09281        | TIGR00104            |           |   |   |   |   |   |   |   | 1 |   |   |   |
| arCOG04733 | J | Translation, ribosomal structure and biogenesis | Tsr3  | Ribosome biogenesis protein Tsr3, contains Fer4-like metal-binding domain o  | COG02042 | pfam04034                       |                |                      |           | 1 |   | 1 | 1 | 1 | 1 | 1 | 1 | 1 | 1 | 2 |
| arCOG01886 | J | Translation, ribosomal structure and biogenesis | TyrS  | Tyrosyl-tRNA synthetase                                                      | COG00162 | pfam00579                       | cd00805        | TIGR00234            | 1         |   | 1 | 1 | 1 | 1 | 1 | 1 | 1 | 1 | 2 |   |
| arCOG04174 | J | Translation, ribosomal structure and biogenesis | TYW1  | Wybutosine (yW) biosynthesis enzyme, Fe-S oxidoreductase                     | COG00731 | pfam04055, pfam0860             | cd01335        | TIGR03972            | 1         | 2 | 1 |   |   |   |   | 1 | 1 | 1 | 3 | 3 |
| arCOG10124 | J | Translation, ribosomal structure and biogenesis | TYW2  | Wybutosine (yW) biosynthesis enzyme, TYW2 transferase                        | COG02520 | pfam02475                       | cd02440        | TIGR01444            |           |   |   | 1 |   |   |   |   | 1 | 1 | 2 |   |
| arCOG04156 | J | Translation, ribosomal structure and biogenesis | TYW3  | Wybutosine (yW) biosynthesis enzyme                                          | COG01590 | pfam02676                       |                |                      | 1         |   |   | 1 |   |   |   |   | 1 |   |   |   |
| arCOG00808 | J | Translation, ribosomal structure and biogenesis | ValS  | Valyl-tRNA synthetase                                                        | COG00525 | pfam00133, pfam0826             | cd00817, cd079 | TIGR00422            | 1         | 1 | 1 |   |   |   |   |   | 1 | 1 | 2 | 6 |
| arCOG04225 | J | Translation, ribosomal structure and biogenesis | YmdB  | O-acetyl-ADP-ribose deacetylase (regulator of RNase III), contains Macro dom | COG02110 | pfam01661                       | cd02907        |                      |           |   |   |   |   |   |   |   | 1 | 1 | 1 | 1 |
| arCOG00541 | J | Translation, ribosomal structure and biogenesis | YSH1  | Predicted exonuclease of the beta-lactamase fold involved in RNA processing  | COG01236 | pfam00753, pfam10996, pfam07521 |                | TIGR03675            | 1         |   |   | 1 |   |   |   | 1 | 1 | 1 | 1 | 6 |
| arCOG00545 | J | Translation, ribosomal structure and biogenesis | YSH1  | Predicted exonuclease of the beta-lactamase fold involved in RNA processing  | COG01236 |                                 |                | TIGR04122            | 1         | 1 | 1 | 1 |   | 1 | 2 |   |   |   |   |   |

| CELLULAR PROCESSES AND SIGNALING |   |                                                            |           |                                                                                                    |          |                                                             |                 |           |   |   |   |   |   |   |   |   |   |   |
|----------------------------------|---|------------------------------------------------------------|-----------|----------------------------------------------------------------------------------------------------|----------|-------------------------------------------------------------|-----------------|-----------|---|---|---|---|---|---|---|---|---|---|
| arCOG02263                       | D | Cell cycle control, cell division, chromosome partitioning | -         | Predicted cell division protein, SepF homolog                                                      | COG02450 | pfa004472                                                   |                 |           |   | 1 | 1 | 1 | 1 |   | 1 |   |   |   |
| arCOG11012                       | D | Cell cycle control, cell division, chromosome partitioning | AT51      | Alpha-tubulin suppressor and related RCC1 domain-containing proteins                               | COG05184 | pfa013540,pfa000415,pfa000415,pfa000415,pfa000415,pfa000415 |                 |           | 1 | 2 |   |   |   |   |   | 7 | 3 | 6 |
| arCOG04701                       | D | Cell cycle control, cell division, chromosome partitioning | CrcB/FEX  | Integral membrane protein possibly involved in fluoride export and chromosome partitioning         | COG00239 | pfa002537                                                   |                 | TIGR00494 |   |   |   |   |   |   |   |   |   | 3 |
| arCOG02201                       | D | Cell cycle control, cell division, chromosome partitioning | FtsZ      | Cell division GTPase                                                                               | COG00206 | pfa000091,pfa01232                                          | cd02201         | TIGR00065 | 2 | 3 | 1 | 2 |   | 1 | 1 |   | 2 | 1 |
| arCOG05007                       | D | Cell cycle control, cell division, chromosome partitioning | Maf       | Nucleotide-binding protein implicated in inhibition of septum formation                            | COG00424 | pfa002545                                                   | cd00555         | TIGR00172 |   |   |   |   |   |   |   | 2 | 1 | 3 |
| arCOG03061                       | D | Cell cycle control, cell division, chromosome partitioning | MreB      | Actin-like ATPase involved in cell morphogenesis                                                   | COG01077 | pfa006723                                                   | cd10227         | TIGR00904 |   |   |   |   |   |   |   | 1 | 1 | 1 |
| arCOG00585                       | D | Cell cycle control, cell division, chromosome partitioning | Mrp       | Mrp family protein, ATPase, contains iron-sulfur cluster                                           | COG00489 | pfa010609                                                   | cd02037         | TIGR01969 |   |   |   |   |   |   |   | 1 | 3 |   |
| arCOG00371                       | D | Cell cycle control, cell division, chromosome partitioning | Smc       | Chromosome segregation ATPase                                                                      | COG01196 | pfa002463                                                   | cd03278,cd03278 | TIGR02169 |   |   |   |   |   | 1 |   | 3 |   |   |
| arCOG00586                       | D | Cell cycle control, cell division, chromosome partitioning | Soj       | ATPase involved in chromosome partitioning, ParA family                                            | COG01192 | pfa001656                                                   | cd02042         | TIGR03453 |   |   |   |   |   |   |   |   |   | 1 |
| arCOG02416                       | N | Cell motility                                              | -         | Pilin/Flagellin, FlaG/FlaF family                                                                  | COG03430 | pfa007790                                                   |                 |           |   | 1 |   |   |   | 1 |   | 3 | 1 |   |
| arCOG00434                       | N | Cell motility                                              | -         | AAA+ ATPase of MoxR-like family, a component of a putative secretion system                        | COG00714 | pfa007726                                                   | cd00009         | TIGR02031 | 2 | 1 | 1 | 2 |   | 2 | 2 | 2 | 3 |   |
| arCOG02079                       | N | Cell motility                                              | -         | S-layer protein, possibly associated with type IV pili like system                                 | COG01361 |                                                             |                 |           | 1 | 1 | 1 | 1 |   | 1 |   | 1 |   |   |
| arCOG02423                       | N | Cell motility                                              | -         | Pilin/Flagellin, FlaG/FlaF family                                                                  | COG03430 | pfa007790                                                   |                 |           | 1 | 1 | 1 |   | 1 | 2 |   |   |   |   |
| arCOG02911                       | N | Cell motility                                              | -         | Predicted pilin/flagellin                                                                          | SC_00343 |                                                             |                 |           |   |   |   |   |   |   |   | 1 |   |   |
| arCOG02382                       | N | Cell motility                                              | CheB      | Chemotaxis response regulator containing a CheY-like receiver domain and a histidine kinase domain | COG02201 | pfa000072,pfa0133                                           | cd00156         | TIGR02875 |   |   |   |   |   |   |   |   | 1 |   |
| arCOG01819                       | N | Cell motility                                              | CpaF      | Pilus assembly protein, ATPase of CpaF family                                                      | COG04962 | pfa004037                                                   | cd01130         | TIGR03819 | 1 | 2 | 1 | 1 | 1 | 1 |   | 1 | 1 | 1 |
| arCOG01829                       | N | Cell motility                                              | FlaB      | Archaeal flagellins                                                                                | COG01681 |                                                             |                 |           |   |   |   |   |   |   |   | 3 |   | 1 |
| arCOG02964                       | N | Cell motility                                              | FlaD      | Archaealium protein D/E                                                                            | COG03351 | pfa005377,pfa004659                                         |                 |           |   |   |   |   |   |   |   | 2 |   |   |
| arCOG01824                       | N | Cell motility                                              | FlaF      | Archaealium protein F, flagellin of FlaG/FlaF family                                               | COG03353 |                                                             |                 |           |   |   |   |   |   |   |   | 1 |   |   |
| arCOG01822                       | N | Cell motility                                              | FlaG      | Archaealium protein G, flagellin of FlaG/FlaF family                                               | COG03354 |                                                             |                 |           |   |   |   |   |   |   |   | 1 | 1 |   |
| arCOG04148                       | N | Cell motility                                              | FlaH      | ATPase involved in biogenesis of archaealium                                                       | COG02874 | pfa006745                                                   | cd01394         | TIGR03881 |   |   |   |   |   |   |   | 1 | 1 |   |
| arCOG01809                       | N | Cell motility                                              | FlaJ      | Archaealium assembly protein J, TadC family                                                        | COG01955 |                                                             |                 |           |   |   |   |   |   |   |   | 1 | 1 |   |
| arCOG02298                       | N | Cell motility                                              | FlaK/PulO | Peptidase A24A, prepilin type IV                                                                   | COG01989 | pfa01478,pfa006847                                          |                 |           | 1 | 1 | 1 | 1 |   | 1 | 2 | 1 | 1 |   |
| arCOG01808                       | N | Cell motility                                              | TadC      | Pilus assembly protein TadC                                                                        | COG02064 | pfa00482,pfa00482                                           |                 |           | 2 | 2 | 2 | 2 | 2 | 2 | 2 | 2 | 2 | 4 |
| arCOG01811                       | N | Cell motility                                              | TadC      | Pilus assembly protein TadC                                                                        | COG02064 |                                                             |                 |           | 1 | 1 | 1 | 1 | 1 | 1 | 1 |   |   |   |
| arCOG01812                       | N | Cell motility                                              | TadC      | Pilus assembly protein TadC                                                                        | COG02064 |                                                             |                 |           | 1 | 3 | 1 | 1 | 1 | 1 | 1 |   | 1 | 1 |
| arCOG01817                       | N | Cell motility                                              | VirB11    | ATPase involved in archaealium/pili biosynthesis                                                   | COG00630 | pfa004037                                                   | cd01130         | TIGR03819 | 1 | 1 | 1 | 1 | 1 | 1 | 1 | 1 | 3 | 2 |
| arCOG02488                       | M | Cell wall/membrane/envelope biogenesis                     | -         | Cell surface protein, a component of a putative secretion system                                   | SC_00293 |                                                             |                 |           | 1 | 1 | 1 | 1 |   | 1 | 1 | 1 | 1 |   |
| arCOG01385                       | M | Cell wall/membrane/envelope biogenesis                     | -         | Glycosyl transferase family 2                                                                      | COG00463 | pfa000535                                                   | cd02522         | TIGR04283 | 1 | 1 | 1 | 1 |   | 1 | 1 | 2 | 2 | 3 |
| arCOG05978                       | M | Cell wall/membrane/envelope biogenesis                     | -         | Extracellular protein containing Kelch and FN3 domains                                             |          | pfa007081                                                   |                 |           |   |   | 2 |   |   | 1 | 1 | 8 |   |   |
| arCOG00894                       | M | Cell wall/membrane/envelope biogenesis                     | -         | Glycosyl transferase family 2                                                                      | COG00463 | pfa000535                                                   | cd04179         | TIGR04182 | 2 | 1 | 2 | 2 | 2 | 1 | 2 | 1 | 2 | 3 |
| arCOG02532                       | M | Cell wall/membrane/envelope biogenesis                     | -         | Secreted Beta-propeller repeat protein fused to CARDB-like adhesion module                         | COG03291 | pfa007705                                                   |                 | TIGR04213 | 1 |   |   | 2 | 1 | 1 | 2 | 2 | 1 | 2 |
| arCOG07560                       | M | Cell wall/membrane/envelope biogenesis                     | -         | Cell surface protein                                                                               |          |                                                             |                 |           |   |   | 1 |   |   |   | 1 |   |   | 1 |

|            |   |                                        |           |                                                                          |          |                                    |                |                      |   |   |   |   |   |   |   |   |   |   |
|------------|---|----------------------------------------|-----------|--------------------------------------------------------------------------|----------|------------------------------------|----------------|----------------------|---|---|---|---|---|---|---|---|---|---|
| arCG003336 | M | Cell wall/membrane/envelope biogenesis | -         | Surface protein containing fasciclin-like repeats                        | COG02335 | pfam02469                          |                |                      |   | 1 | 1 | 1 |   |   |   |   | 3 | 1 |
| arCG009173 | M | Cell wall/membrane/envelope biogenesis | -         | S-layer protein                                                          |          | pfam07790, pfam0770                | cd00146, cd001 | TIGR00864, TIGR      | 1 |   | 1 |   |   |   |   |   |   |   |
| arCG002086 | M | Cell wall/membrane/envelope biogenesis | -         | S-layer domain                                                           | COG01361 |                                    |                |                      | 2 |   |   |   |   |   |   |   |   |   |
| arCG003335 | M | Cell wall/membrane/envelope biogenesis | -         | Surface protein containing fasciclin-like repeats                        | COG02335 | pfam02469                          |                |                      |   |   |   |   |   |   |   |   |   | 1 |
| arCG008795 | M | Cell wall/membrane/envelope biogenesis | -         | Predicted S-layer protein with Ig-like domain                            | SC.00192 | pfam00127                          | cd13921        | TIGR02657            |   | 1 |   |   |   |   |   |   |   |   |
| arCG002482 | M | Cell wall/membrane/envelope biogenesis | -         | WD40/PQO-like beta propeller repeat containing protein                   | COG01520 | pfam13570, pfam1357                | cd10276        | TIGR03300            |   |   | 1 |   |   |   |   |   |   |   |
| arCG001383 | M | Cell wall/membrane/envelope biogenesis | -         | Glycosyl transferase family 2                                            | COG01216 | pfam00535                          | cd04186        | TIGR04017, TIGR01556 |   |   |   | 1 |   |   |   | 1 | 1 | 2 |
| arCG000568 | M | Cell wall/membrane/envelope biogenesis | -         | Oligosaccharyl transferase STT3 or related protein                       | COG01287 |                                    |                |                      |   |   |   |   |   |   |   | 1 |   |   |
| arCG001391 | M | Cell wall/membrane/envelope biogenesis | -         | Glycosyl transferase family 2                                            | COG01215 | pfam13641                          | cd06421        | TIGR03030            |   |   |   |   |   |   |   | 1 |   |   |
| arCG002080 | M | Cell wall/membrane/envelope biogenesis | -         | S-layer domain                                                           | COG01361 |                                    |                |                      |   |   |   |   |   |   |   | 1 |   |   |
| arCG002559 | M | Cell wall/membrane/envelope biogenesis | -         | Cell surface protein                                                     | SC.00325 |                                    |                |                      |   |   |   |   |   |   |   | 1 |   |   |
| arCG003553 | M | Cell wall/membrane/envelope biogenesis | -         | Cell surface protein                                                     | COG01572 | pfam11824, pfam07705               |                |                      |   |   |   |   |   |   |   | 1 |   |   |
| arCG012808 | M | Cell wall/membrane/envelope biogenesis | -         | Glycosyltransferase, GT1 family                                          | COG00438 |                                    | cd03822        |                      |   |   |   |   |   |   |   | 1 |   |   |
| arCG001389 | M | Cell wall/membrane/envelope biogenesis | -         | Glycosyl transferase family 2                                            | COG01215 | pfam13641                          | cd06423        | TIGR03937            |   |   |   |   |   |   |   |   | 1 | 1 |
| arCG008095 | M | Cell wall/membrane/envelope biogenesis | -         | Glycosyl transferase family 2                                            | COG00463 | pfam00535                          | cd06442        | TIGR04182            |   |   |   |   |   |   |   |   | 1 |   |
| arCG002487 | M | Cell wall/membrane/envelope biogenesis | -         | Cell surface protein, a component of a putative secretion system         |          | pfam02369                          |                |                      |   |   |   |   |   |   |   |   | 1 |   |
| arCG002538 | M | Cell wall/membrane/envelope biogenesis | -         | Secreted protein, with PKD repeat domain                                 | COG03291 |                                    |                | TIGR04213            |   |   |   |   |   |   |   | 1 |   |   |
| arCG008096 | M | Cell wall/membrane/envelope biogenesis | -         | Glycosyl transferase family 2                                            | COG00463 | pfam00535                          | cd04179        | TIGR04182            |   |   |   |   |   |   |   |   | 2 | 1 |
| arCG001410 | M | Cell wall/membrane/envelope biogenesis | AglA      | Glycosyltransferase                                                      | COG00438 | pfam13579, pfam00533               | cd03794        | TIGR02149            |   | 5 | 5 | 3 | 3 | 1 | 1 | 2 | 4 | 1 |
| arCG005365 | M | Cell wall/membrane/envelope biogenesis | AglB      | Oligosaccharyltransferase membrane subunit                               | COG01287 | pfam02516, pfam13620, pfam13620, p |                | TIGR04154            |   | 1 | 1 | 1 | 1 | 1 | 1 |   | 1 |   |
| arCG008089 | M | Cell wall/membrane/envelope biogenesis | AglH/D2   | Predicted flippase                                                       | COG00392 | pfam03706                          |                | TIGR00374            |   | 1 |   |   |   |   |   | 1 |   | 2 |
| arCG000664 | M | Cell wall/membrane/envelope biogenesis | AglF/RfbA | Glucose-1-phosphate uridylyltransferase                                  | COG01209 | pfam00483                          | cd04181        | TIGR03992            |   |   |   |   |   |   |   |   | 1 | 1 |
| arCG001399 | M | Cell wall/membrane/envelope biogenesis | AglH/Rfe  | UDP-N-acetylmuramyl pentapeptide phosphotransferase/UDP-N-acetylglucos   | COG00472 | pfam00953                          | cd06856        | TIGR00445            |   | 1 |   |   |   |   |   | 1 |   |   |
| arCG001403 | M | Cell wall/membrane/envelope biogenesis | AglL      | Glycosyltransferase                                                      | COG00438 | pfam13439, pfam00533               | cd03804        |                      |   | 3 | 2 | 1 | 2 | 1 | 1 | 1 | 3 | 6 |
| arCG002053 | M | Cell wall/membrane/envelope biogenesis | AglM/Ugd  | UDP-glucose 6-dehydrogenase                                              | COG01004 | pfam03721, pfam00984, pfam03720    |                | TIGR03026            |   | 1 | 1 |   |   |   | 1 | 1 | 1 | 9 |
| arCG001381 | M | Cell wall/membrane/envelope biogenesis | AglO      | Glycosyl transferase family 2                                            | COG00463 | pfam00535                          | cd00761        | TIGR04283            |   |   |   |   |   |   |   |   | 1 | 1 |
| arCG002209 | M | Cell wall/membrane/envelope biogenesis | AglR      | MATE family membrane protein, Rfbx family                                | COG02244 |                                    | cd13128        |                      |   | 3 | 2 | 1 | 1 | 1 | 1 | 1 | 3 | 2 |
| arCG010648 | M | Cell wall/membrane/envelope biogenesis | BglC      | Aryl-phospho-beta-D-glucosidase BglC, GH1 family                         | COG02730 | pfam00150                          |                |                      |   |   |   |   |   |   |   |   | 1 |   |
| arCG001375 | M | Cell wall/membrane/envelope biogenesis | FlaA1     | NDP-sugar epimerase, includes UDP-GlcNAc-inverting 4,6-dehydratase FlaA1 | COG01086 | pfam02719                          | cd05237        | TIGR0                |   |   |   |   |   |   |   |   |   |   |

|            |   |                                                                   |         |                                                                                          |          |                      |         |                      |   |   |   |   |   |   |   |  |    |   |   |   |  |
|------------|---|-------------------------------------------------------------------|---------|------------------------------------------------------------------------------------------|----------|----------------------|---------|----------------------|---|---|---|---|---|---|---|--|----|---|---|---|--|
| arCOG00815 | V | Defense mechanisms                                                | AbrB    | AbrB family transcriptional regulator                                                    | COG02002 | pfam04014            |         | TIGR01439            |   |   |   |   |   |   |   |  |    |   | 1 |   |  |
| arCOG01452 | V | Defense mechanisms                                                | Cas1    | CRISPR-associated protein Cas1                                                           | COG01518 | pfam01867            | cd09636 | TIGR00287            |   |   |   |   |   |   |   |  |    |   | 2 |   |  |
| arCOG02666 | V | Defense mechanisms                                                | Cas10   | CRISPR-associated protein Cas10, large subunit of Type III system effector complex       | COG01353 | pfam01966            |         |                      |   |   |   |   |   |   |   |  |    | 1 |   |   |  |
| arCOG04194 | V | Defense mechanisms                                                | Cas2    | CRISPR-associated protein Cas2                                                           | COG01343 | pfam09827            | cd09725 | TIGR01573            |   |   |   |   |   |   |   |  |    | 1 |   |   |  |
| arCOG00786 | V | Defense mechanisms                                                | Cas4    | CRISPR-associated protein Cas4, RecB family exonuclease                                  | COG01468 | pfam01930            | cd09637 | TIGR00372            | 1 | 2 | 1 | 1 |   | 1 | 1 |  |    | 1 | 1 |   |  |
| arCOG00790 | V | Defense mechanisms                                                | Cas4    | CRISPR-associated protein Cas4, RecB family exonuclease                                  | COG01468 |                      | cd09637 | TIGR00372            |   |   |   |   |   |   |   |  |    | 1 |   |   |  |
| arCOG00794 | V | Defense mechanisms                                                | Cas4    | CRISPR-associated protein Cas4, RecB family nuclease                                     | COG01468 | pfam01930            | cd09637 | TIGR00372            |   |   |   |   |   |   |   |  |    | 1 |   |   |  |
| arCOG04342 | V | Defense mechanisms                                                | Cas6    | CRISPR-Cas system related protein Cas6, RAMP superfamily                                 | COG01583 | pfam01881            | cd09652 | TIGR01877            |   |   |   |   |   |   |   |  |    | 1 |   |   |  |
| arCOG00196 | V | Defense mechanisms                                                | CcmA    | ABC-type multidrug transport system, ATPase component                                    | COG01131 | pfam00005            | cd03230 | TIGR03740            | 2 | 1 | 1 |   | 1 | 1 |   |  | 1  |   | 1 | 2 |  |
| arCOG00194 | V | Defense mechanisms                                                | CcmA    | ABC-type multidrug transport system, ATPase component                                    | COG01131 | pfam00005            | cd03230 | TIGR01188            | 7 | 7 | 6 | 2 | 1 | 1 | 6 |  | 3  | 5 | 4 | 6 |  |
| arCOG02665 | V | Defense mechanisms                                                | Csm3e7  | CRISPR-Cas system related protein, RAMP superfamily Cas5 group                           | COG01769 | pfam09700            |         |                      |   |   |   |   |   |   |   |  |    | 1 |   |   |  |
| arCOG06487 | V | Defense mechanisms                                                | Csm255  | CRISPR/Cas system CSM-associated protein Csm2, small subunit                             | COG01421 | pfam03750            | cd09647 | TIGR01870            |   |   |   |   |   |   |   |  |    | 1 |   |   |  |
| arCOG02658 | V | Defense mechanisms                                                | Csm3e7  | CRISPR-Cas system related protein, RAMP superfamily Cas7 group                           | COG01337 | pfam03787            | cd09683 | TIGR02581            |   |   |   |   |   |   |   |  |    | 1 |   |   |  |
| arCOG03222 | V | Defense mechanisms                                                | Csm4e5  | CRISPR-Cas system related protein, RAMP superfamily Cas5 group                           | COG01567 |                      | cd09663 | TIGR01903            |   |   |   |   |   |   |   |  |    | 1 |   |   |  |
| arCOG03718 | V | Defense mechanisms                                                | Csm5e7  | CRISPR/Cas system CSM-associated protein Csm5, group 7 of RAMP superfamily               | COG01332 |                      | cd09662 | TIGR01899            |   |   |   |   |   |   |   |  |    | 1 |   |   |  |
| arCOG01449 | V | Defense mechanisms                                                | Csx1    | CARF domain containing protein                                                           | COG01517 |                      |         | TIGR01884            |   |   |   |   |   |   |   |  |    | 1 |   |   |  |
| arCOG07641 | V | Defense mechanisms                                                | Csx1    | CARF domain containing protein, contains HTH and HEPN domains                            | COG01517 | pfam09455            | cd09732 | TIGR02221            |   |   |   |   |   |   |   |  |    | 1 |   |   |  |
| arCOG03847 | V | Defense mechanisms                                                | Csx1    | CARF domain containing protein                                                           | COG01517 |                      |         |                      |   |   |   |   |   |   |   |  |    | 2 |   |   |  |
| arCOG00373 | V | Defense mechanisms                                                | DndD    | DNA sulfur modification protein DndD, ATPase                                             | COG01196 | pfam13514            |         | TIGR02169            |   |   |   |   |   |   |   |  | 1  | 1 |   |   |  |
| arCOG02632 | V | Defense mechanisms                                                | HsdM    | Type I restriction-modification system methyltransferase subunit                         | COG00286 | pfam12161, pfam02384 |         | TIGR00497            |   |   |   |   |   |   |   |  |    | 1 |   | 2 |  |
| arCOG03779 | V | Defense mechanisms                                                | McrB    | GPase subunit of restriction endonuclease                                                | COG01401 | pfam07728            | cd00009 |                      | 2 | 1 | 1 |   |   |   |   |  | 2  | 1 |   |   |  |
| arCOG05102 | V | Defense mechanisms                                                | McrC    | McrBC 5-methylcytosine restriction system component                                      | COG04268 | pfam10117            |         |                      |   |   |   |   |   |   |   |  |    | 1 |   |   |  |
| arCOG02841 | V | Defense mechanisms                                                | MdlB    | ABC-type multidrug transport system, ATPase and permease component                       | COG01132 | pfam00664, pfam0000  | cd03253 | TIGR02203            | 1 | 1 |   | 1 | 1 |   |   |  | 2  | 2 | 3 |   |  |
| arCOG02777 | V | Defense mechanisms                                                | Mrr     | Restriction endonuclease                                                                 | COG01715 | pfam04471            |         |                      |   |   |   |   |   |   |   |  |    | 1 |   |   |  |
| arCOG01008 | V | Defense mechanisms                                                | NikR    | Transcriptional regulator, CopG/Arc/MetI family (DNA-binding and a metal-binding domain) | COG00864 | pfam08753            |         | TIGR02793            |   |   |   |   |   |   |   |  |    | 1 | 1 | 1 |  |
| arCOG02836 | V | Defense mechanisms                                                | NikR    | Transcriptional regulator, CopG/Arc/MetI family (DNA-binding and a metal-binding domain) | COG00864 |                      |         |                      |   |   |   |   |   |   |   |  |    | 1 |   |   |  |
| arCOG00516 | V | Defense mechanisms                                                | NimA    | Nitroimidazole reductase NimA or a related FMN-containing flavoprotein, pyridine         | COG03467 | pfam01243            |         | TIGR04023            | 1 |   |   | 1 |   |   |   |  |    |   |   |   |  |
| arCOG00525 | V | Defense mechanisms                                                | NimA    | Nitroimidazole reductase NimA or a related FMN-containing flavoprotein, pyridine         | COG03467 | pfam12724, pfam01243 |         |                      |   | 2 | 1 |   |   | 1 |   |  |    |   |   |   |  |
| arCOG01731 | V | Defense mechanisms                                                | NorM    | Na+-driven multidrug efflux pump                                                         | COG00534 | pfam01554, pfam0155  | cd13137 | TIGR00797            | 1 | 1 | 1 | 1 | 1 |   |   |  | 3  |   |   |   |  |
| arCOG01663 | V | Defense mechanisms                                                | RelE    | Cytotoxic translational repressor of toxin-antitoxin stability system                    | COG02026 | pfam05016            |         |                      |   |   |   |   |   |   |   |  | 1  |   |   |   |  |
| arCOG01665 | V | Defense mechanisms                                                | RelE    | Cytotoxic translational repressor of toxin-antitoxin stability system                    | COG02026 | pfam05016            |         |                      |   |   |   |   |   |   |   |  |    | 3 |   |   |  |
| arCOG00922 | V | Defense mechanisms                                                | SalX    | ABC-type antimicrobial peptide transport system, ATPase component                        | COG01136 | pfam00005            | cd03255 | TIGR02673            | 3 | 2 | 3 | 1 |   |   | 2 |  | 2  | 2 | 4 | 7 |  |
| arCOG02312 | V | Defense mechanisms                                                | SalY    | ABC-type antimicrobial peptide transport system, permease component                      | COG00577 | pfam02687            |         | TIGR02212            | 1 | 1 | 1 | 1 |   |   |   |  | 2  | 2 | 3 |   |  |
| arCOG02957 | U | Intracellular trafficking, secretion, and vesicular transport     | SBH1    | Preprotein translocase subunit SecE/beta                                                 | COG04023 | pfam03911            |         |                      | 1 | 1 |   |   |   | 1 | 1 |  | 1  | 1 | 2 |   |  |
| arCOG02673 | U | Intracellular trafficking, secretion, and vesicular transport     | -       | OxaA/SpoJ/YidC translocase/secretase, sec-independent integration of nascent             | COG01422 | pfam01956            |         |                      | 1 | 2 |   |   | 1 | 1 | 1 |  | 1  | 1 | 1 |   |  |
| arCOG04169 | U | Intracellular trafficking, secretion, and vesicular transport     | SecY    | Preprotein translocase subunit SecY                                                      | COG00201 | pfam10559, pfam00344 |         | TIGR00967            | 1 | 2 |   |   | 1 | 1 | 1 |  | 1  | 1 | 2 |   |  |
| arCOG01217 | U | Intracellular trafficking, secretion, and vesicular transport     | SEC65   | Signal recognition particle 19 kDa protein                                               | COG01400 |                      |         |                      | 1 |   | 1 |   |   | 1 | 1 |  | 1  | 1 | 2 |   |  |
| arCOG04736 | U | Intracellular trafficking, secretion, and vesicular transport     | TatC    | Sec-independent protein secretion pathway component TatC                                 | COG00805 | pfam00902, pfam00902 |         | TIGR01912, TIGR01912 |   |   |   |   | 1 | 1 | 1 |  | 1  | 1 | 1 |   |  |
| arCOG01739 | U | Intracellular trafficking, secretion, and vesicular transport     | LepB    | Signal peptidase I                                                                       | COG00681 | pfam00717            | cd06530 | TIGR02228            | 1 | 1 | 1 | 1 | 1 | 1 | 1 |  | 1  | 1 | 2 |   |  |
| arCOG02204 | U | Intracellular trafficking, secretion, and vesicular transport     | Sss1    | Preprotein translocase subunit Sss1                                                      | COG02443 |                      |         |                      | 1 | 2 | 1 | 1 |   | 1 | 1 |  | 1  | 1 | 2 |   |  |
| arCOG01919 | U | Intracellular trafficking, secretion, and vesicular transport     | TatC    | Sec-independent protein secretion pathway component TatC                                 | COG00805 | pfam00902            |         | TIGR00945            | 1 | 2 | 1 |   |   | 1 |   |  | 1  | 2 | 3 |   |  |
| arCOG01228 | U | Intracellular trafficking, secretion, and vesicular transport     | Ffh     | Signal recognition particle GTPase                                                       | COG00541 | pfam02881, pfam0044  | cd03115 | TIGR00959            |   | 1 | 1 | 1 |   |   | 1 |  | 1  | 1 | 1 |   |  |
| arCOG02694 | U | Intracellular trafficking, secretion, and vesicular transport     | TatA    | Sec-independent protein secretion pathway component                                      | COG01826 |                      |         | TIGR01411            |   | 2 | 1 |   |   | 1 | 1 |  | 1  | 1 | 1 |   |  |
| arCOG04471 | U | Intracellular trafficking, secretion, and vesicular transport     | -       | Exosortase                                                                               | COG04083 | pfam09721            |         | TIGR04125            |   |   |   |   |   |   | 1 |  | 1  | 1 | 1 |   |  |
| arCOG01227 | U | Intracellular trafficking, secretion, and vesicular transport     | FtsY    | Signal recognition particle GTPase                                                       | COG00552 | pfam02881, pfam0044  | cd03115 | TIGR00064            | 1 |   |   |   |   |   |   |  | 1  | 1 | 5 |   |  |
| arCOG01997 | U | Intracellular trafficking, secretion, and vesicular transport     | MarC    | Multiple antibiotic transporter                                                          | COG02095 | pfam01914            |         | TIGR00427            |   |   |   |   |   |   |   |  | 1  |   |   |   |  |
| arCOG03382 | U | Intracellular trafficking, secretion, and vesicular transport     | TolB    | Periplasmic component of the Tol biopolymer transport system                             | COG00823 | pfam00930            |         | TIGR02800            |   |   |   |   |   |   |   |  | 1  |   |   |   |  |
| arCOG04816 | U | Intracellular trafficking, secretion, and vesicular transport     | -       | Trac/Trad/VirD4 family enzyme, ATPase                                                    | COG03505 | pfam12846            |         |                      |   |   |   |   |   |   |   |  | 1  |   |   |   |  |
| arCOG07496 | U | Intracellular trafficking, secretion, and vesicular transport     | VirB4   | Type IV secretory pathway, VirB4 component                                               | COG03451 |                      |         |                      |   |   |   |   |   |   |   |  | 1  |   |   |   |  |
| arCOG03383 | U | Intracellular trafficking, secretion, and vesicular transport     | TolB    | Periplasmic component of the Tol biopolymer transport system                             | COG00823 | pfam00930, pfam08308 |         | TIGR02800            |   |   |   |   |   |   |   |  | 1  |   | 1 |   |  |
| arCOG01241 | X | Mobilome: prophages, transposons                                  | XerC    | XerD/XerC family integrase                                                               | COG00582 | pfam13495, pfam0058  | cd00796 | TIGR02224            |   |   |   |   |   |   |   |  | 1  | 4 | 1 | 2 |  |
| arCOG03473 | X | Mobilome: prophages, transposons                                  | -       | Transposase                                                                              | COG05421 |                      |         |                      |   | 2 |   |   |   |   |   |  |    | 1 |   |   |  |
| arCOG03989 | X | Mobilome: prophages, transposons                                  | XerC    | XerD/XerC family integrase                                                               | COG00582 | pfam00589            | cd00397 |                      |   |   |   |   |   |   |   |  | 1  |   |   |   |  |
| arCOG10214 | X | Mobilome: prophages, transposons                                  | -       | Relaxase/mobilization nuclease domain-containing protein                                 |          |                      |         |                      |   |   |   |   |   |   |   |  | 1  |   |   |   |  |
| arCOG10424 | X | Mobilome: prophages, transposons                                  | GepA    | Uncharacterized phage-associated protein                                                 | COG03600 |                      |         |                      |   |   |   |   |   |   |   |  | 1  |   |   |   |  |
| arCOG02751 | X | Mobilome: prophages, transposons                                  | -       | Transposase, ISS family                                                                  | COG03039 | pfam01609            |         |                      |   |   |   |   |   |   |   |  | 10 |   |   |   |  |
| arCOG01915 | O | Posttranslational modification, protein turnover, and degradation | HflC    | Membrane protease subunit, stomatin/prohibitin homolog                                   | COG00330 | pfam01145            | cd08826 | TIGR01933            | 1 | 1 | 1 |   |   | 1 |   |  | 1  |   | 1 |   |  |
| arCOG01912 | O | Posttranslational modification, protein turnover, and degradation | -       | Membrane protein implicated in regulation of membrane protease activity                  | COG01585 | pfam01957            |         |                      | 1 | 1 | 1 | 1 |   | 1 |   |  | 1  |   |   |   |  |
| arCOG01306 | O | Posttranslational modification, protein turnover, and degradation | RPT1    | ATP-dependent 26S proteasome regulatory subunit                                          | COG01222 | pfam00004            | cd00009 | TIGR01242            | 1 | 1 |   |   |   | 1 |   |  | 1  | 1 | 2 | 3 |  |
| arCOG06181 | O | Posttranslational modification, protein turnover, and degradation | TrxA    | Thiol-disulfide isomerase or thioredoxin                                                 | COG00526 | pfam00578            | cd02966 |                      | 1 | 1 |   |   | 1 |   |   |  | 1  |   |   |   |  |
| arCOG01341 | O | Posttranslational modification, protein turnover, and degradation | GIM5    | Predicted prefoldin, molecular chaperone implicated in de novo protein folding           | COG01730 | pfam02996            | cd00584 | TIGR00293            | 1 | 1 |   |   |   | 1 |   |  | 1  |   |   |   |  |
| arCOG00609 | O | Posttranslational modification, protein turnover, and degradation | RseP    | Membrane-associated protease RseP, regulator of RpoF activity in bacteria                | COG00750 | pfam02163            | cd06160 |                      | 1 | 2 | 1 | 1 | 1 | 1 |   |  | 1  |   |   |   |  |
| arCOG02959 | O | Posttranslational modification, protein turnover, and degradation | l1ap    | Zn-dependent amino- or carboxypeptidase, M28 family                                      | COG02234 | pfam04389            | cd05643 |                      | 1 | 2 |   |   |   |   |   |  | 1  |   |   |   |  |
| arCOG00314 | O | Posttranslational modification, protein turnover, and degradation | l1rXa   | Thiol-disulfide isomerase or thioredoxin                                                 | COG00526 | pfam00578            | cd02969 |                      | 1 |   | 1 | 1 | 1 | 1 | 1 |  | 1  |   | 2 |   |  |
| arCOG04463 | O | Posttranslational modification, protein turnover, and degradation | -       | Presenilin-like membrane protease, A22 family                                            | COG03389 | pfam06550            |         |                      | 1 |   | 1 | 1 | 1 | 1 | 1 |  | 1  | 1 | 1 |   |  |
| arCOG01257 | O | Posttranslational modification, protein turnover, and degradation | GroEL   | Chaperonin GroEL, HSP60 family                                                           | COG00459 | pfam00118            | cd03343 | TIGR02339            | 1 |   | 1 | 1 |   | 1 | 1 |  | 1  | 2 | 3 | 9 |  |
| arCOG01833 | O | Posttranslational modification, protein turnover, and degradation | l1pA    | Molecular chaperone (HSP20 family)                                                       | COG00071 | pfam00011            | cd06464 |                      | 1 |   |   | 1 |   | 1 | 1 |  | 1  |   |   |   |  |
| arCOG01296 | O | Posttranslational modification, protein turnover, and degradation | l1rXb   | Thioredoxin reductase                                                                    | COG00492 | pfam07992            |         | TIGR01292            | 2 | 1 | 1 | 1 | 1 | 2 | 1 |  | 2  | 1 | 4 |   |  |
| arCOG04767 | O | Posttranslational modification, protein turnover, and degradation | l1pIb   | Peptidyl-prolyl cis-trans isomerase (rotamase) - cyclophilin family                      | COG00652 |                      |         |                      | 2 | 2 | 1 | 2 | 1 | 1 | 1 |  | 1  |   | 3 | 3 |  |
| arCOG06880 | O | Posttranslational modification, protein turnover, and degradation | DnaJ    | DnaJ type Zn finger domain                                                               | COG00484 |                      |         | TIGR02349            | 2 | 2 | 2 |   | 1 | 1 | 1 |  | 1  | 1 | 4 |   |  |
| arCOG02553 | O | Posttranslational modification, protein turnover, and degradation | l1AprE  | Subtilisin-like serine protease                                                          | COG01404 | pfam05048            |         |                      |   | 2 | 1 | 1 | 1 |   |   |  | 1  |   |   |   |  |
| arCOG00980 | O | Posttranslational modification, protein turnover, and degradation | l1SlpA  | FKBP-type peptidyl-prolyl cis-trans isomerase 2                                          | COG01047 | pfam00254            |         |                      |   |   |   |   |   |   |   |  | 1  | 1 | 1 | 2 |  |
| arCOG01139 | O | Posttranslational modification, protein turnover, and degradation | l1Rn1   | Proteasome lid subunit RPN8/RPN11, contains Jab1/MPN domain metalloenz                   | COG01310 | pfam14464            | cd08072 |                      |   |   |   |   |   |   |   |  | 1  | 1 |   |   |  |
| arCOG03610 | O | Posttranslational modification, protein turnover, and degradation | l1AprE  | Subtilisin-like serine protease                                                          | COG01404 |                      | cd02619 |                      |   | 1 |   |   | 1 |   |   |  | 1  | 2 |   | 3 |  |
| arCOG01331 | O | Posttranslational modification, protein turnover, and degradation | l1HtpX  | Zn-dependent protease with chaperone function                                            | COG00501 | pfam01435            |         |                      | 1 | 1 | 1 | 1 |   | 1 | 1 |  |    |   |   |   |  |
| arCOG00971 | O | Posttranslational modification, protein turnover, and degradation | l1PRE1  | 20S proteasome, alpha subunit                                                            | COG00638 | pfam10584, pfam0022  | cd03756 | TIGR03633            | 1 | 1 | 1 | 1 |   | 1 | 1 |  | 1  | 1 | 1 |   |  |
| arCOG02436 | O | Posttranslational modification, protein turnover, and degradation | l1NosY  | ABC-type transport system involved in multi-copper enzyme maturation, per                | COG01277 | pfam12679            |         |                      | 1 | 1 | 1 |   |   |   |   |  | 1  |   |   |   |  |
| arCOG05153 | O | Posttranslational modification, protein turnover, and degradation | l1GroS  | Co-chaperonin GroES (HSP10)                                                              | COG00234 | pfam00166            | cd00320 |                      | 1 | 1 |   |   |   |   |   |  | 1  |   |   |   |  |
| arCOG05154 | O | Posttranslational modification, protein turnover, and degradation | l1GroEL | Chaperonin GroEL (HSP60 family)                                                          | COG00459 | pfam00118            | cd03344 | TIGR02348            | 1 | 1 |   |   |   |   |   |  | 1  |   |   |   |  |
| arCOG02816 | O | Posttranslational modification, protein turnover, and degradation | l1MsrA  | Peptide methionine sulfoxide reductase                                                   | COG00225 | pfam01625            |         | TIGR00401            | 1 | 2 | 1 |   |   |   |   |  |    |   |   |   |  |

|            |   |                                                         |                                                                                           |          |                      |                  |           |   |   |   |   |    |   |   |   |   |   |    |
|------------|---|---------------------------------------------------------|-------------------------------------------------------------------------------------------|----------|----------------------|------------------|-----------|---|---|---|---|----|---|---|---|---|---|----|
| arCG00270  | O | Posttranslational modification, protein turnover, CcmF  | Cytochrome c biogenesis factor                                                            | COG01138 | pfam01578            |                  | TIGR00353 | 1 |   |   |   | 1  |   |   |   |   | 1 | 2  |
| arCG00310  | O | Posttranslational modification, protein turnover, Bcp   | Peroxiorexin                                                                              | COG01225 | pfam00578            | cd03018          | TIGR03137 | 2 | 2 |   |   | 1  |   |   |   | 1 | 2 | 11 |
| arCG004560 | O | Posttranslational modification, protein turnover, IscA  | Fe-S cluster assembly iron-binding protein IscA                                           | COG00316 | pfam01521            |                  | TIGR00049 | 2 | 3 | 1 | 1 | 1  |   |   |   | 1 | 1 | 4  |
| arCG003607 | O | Posttranslational modification, protein turnover, C     | Cysteine protease, C1A family                                                             | COG04870 | pfam00112            | cd02619          |           |   |   | 1 | 1 | 1  |   |   |   | 1 |   |    |
| arCG001845 | O | Posttranslational modification, protein turnover, PaaD  | Metal-sulfur cluster biosynthetic enzyme                                                  | COG02151 | pfam01883            |                  | TIGR02945 |   |   | 1 | 1 | 1  |   |   |   | 2 | 1 | 1  |
| arCG004236 | O | Posttranslational modification, protein turnover, SufC  | Cysteine desulfurase activator ATPase                                                     | COG00396 | pfam00005            | cd03217          | TIGR01978 |   |   | 1 | 1 | 1  |   |   |   | 2 | 1 | 1  |
| arCG004064 | O | Posttranslational modification, protein turnover, RseP  | Membrane-associated protease RseP, regulator of RpoE activity in bacteria                 | COG00750 | pfam02163            | cd06159          | TIGR00054 |   |   | 1 |   |    |   |   |   | 1 | 2 | 1  |
| arCG001226 | O | Posttranslational modification, protein turnover, ArpK  | Putative periplasmic protein kinase ArpK or related GTPase of G3E family                  | COG01703 | pfam03308            | cd03114          | TIGR00750 |   |   |   |   |    |   |   |   | 1 | 1 | 2  |
| arCG001308 | O | Posttranslational modification, protein turnover, Cdc48 | ATPase of the AAA+ class, CDC48 family                                                    | COG00464 | pfam00004, pfam00000 | cd00009, cd00000 | TIGR01243 |   |   |   |   |    |   |   |   | 2 | 2 | 4  |
| arCG000267 | O | Posttranslational modification, protein turnover, CcmC  | ABC-type transport system involved in cytochrome c biogenesis, permease component         | COG00755 | pfam01578            |                  | TIGR01191 |   |   |   |   |    |   |   |   | 1 | 1 | 1  |
| arCG002607 | O | Posttranslational modification, protein turnover, GrxC  | Glutaredoxin                                                                              | COG00695 | pfam00462            | cd02976          | TIGR02196 |   |   |   |   |    |   |   |   | 1 | 1 | 1  |
| arCG004957 | O | Posttranslational modification, protein turnover, CcmE  | Cytochrome c-type biogenesis protein CcmE                                                 | COG02332 |                      |                  |           |   |   |   |   |    |   |   |   | 1 | 1 | 3  |
| arCG002438 | O | Posttranslational modification, protein turnover, NosY  | ABC-type transport system involved in multi-copper enzyme maturation, periplasmic subunit | COG01277 | pfam12679            |                  |           |   |   |   |   |    |   |   |   | 1 |   |    |
| arCG003614 | O | Posttranslational modification, protein turnover, C     | Cysteine protease, C1A family                                                             | COG04870 | pfam00112            | cd02619          |           |   |   |   |   |    |   |   |   | 1 |   |    |
| arCG000065 | O | Posttranslational modification, protein turnover, csdA  | Selenocysteine lyase/Cysteine desulfurase                                                 | COG00520 | pfam00266            | cd06453          | TIGR01979 | 3 | 5 | 4 | 1 | 1  | 2 |   |   | 4 | 2 |    |
| arCG000479 | O | Posttranslational modification, protein turnover, CyoE  | Polyphenyltransferase (cytochrome oxidase assembly factor)                                | COG00109 | pfam01040            | cd13957          | TIGR01473 |   |   | 1 |   |    |   |   |   | 2 | 1 | 1  |
| arCG004142 | O | Posttranslational modification, protein turnover, DYS1  | Deoxyhypusine synthase                                                                    | COG01899 | pfam01916            |                  | TIGR00321 | 2 | 2 | 2 | 2 | 1  | 2 | 2 |   | 1 | 2 | 4  |
| arCG003669 | O | Posttranslational modification, protein turnover, C     | Subtilisin family protease                                                                | COG04934 | pfam09286            | cd11377, cd04056 |           | 4 | 1 | 1 | 3 | 1  | 2 | 2 | 3 | 1 |   | 3  |
| arCG004772 | O | Posttranslational modification, protein turnover, GrpE  | Molecular chaperone GrpE (heat shock protein)                                             | COG00576 | pfam01025            | cd00446          |           | 1 | 2 | 1 |   | 1  | 2 |   |   | 1 | 1 | 2  |
| arCG003060 | O | Posttranslational modification, protein turnover, DnaK  | Chaperone DnaK (HSP70)                                                                    | COG00443 | pfam00012            | cd10234          | TIGR02350 |   | 1 | 2 | 1 | 1  | 2 |   |   | 1 | 1 | 3  |
| arCG003103 | O | Posttranslational modification, protein turnover, CtaA  | Uncharacterized protein required for cytochrome oxidase assembly                          | COG01612 | pfam02628            |                  |           | 2 | 1 | 2 |   | 2  | 1 |   |   | 1 | 1 | 1  |
| arCG001972 | O | Posttranslational modification, protein turnover, TrxA  | Thiol-disulfide isomerase or thioredoxin                                                  | COG00526 | pfam00085            | cd02947          | TIGR01068 | 2 | 2 | 1 | 1 | 1  | 2 |   |   | 2 | 2 | 3  |
| arCG001715 | O | Posttranslational modification, protein turnover, SufB  | Cysteine desulfurase activator SufB                                                       | COG00719 | pfam01458            |                  | TIGR01981 |   |   | 2 | 2 |    |   |   |   | 1 | 2 | 2  |
| arCG000702 | O | Posttranslational modification, protein turnover, AprE  | Subtilisin-like serine protease                                                           | COG01404 | pfam00082            | cd07477          | TIGR03921 | 5 | 6 | 4 | 4 | 4  | 1 | 5 |   | 2 |   | 7  |
| arCG002007 | O | Posttranslational modification, protein turnover, RseP  | Phenyltransferase family protein containing thioredoxin domain                            | COG13331 | pfam03190            | cd02955          |           |   |   | 1 |   |    |   |   |   | 1 |   | 1  |
| arCG002834 | O | Posttranslational modification, protein turnover, RseP  | Membrane-associated protease RseP, regulator of RpoE activity in bacteria                 | COG00750 | pfam02163, pfam1318  | cd06159, cd00900 | TIGR00054 |   |   |   |   | 1  |   |   |   | 1 | 1 | 1  |
| arCG000976 | O | Posttranslational modification, protein turnover, Pcm   | Protein-L-isopartate carboxylmethyltransferase                                            | COG02518 | pfam01135            | cd02440          | TIGR00080 |   |   |   |   | </ |   |   |   |   |   |    |

|            |   |                                |        |                                                                              |          |                      |                  |                          |  |   |   |   |   |   |  |   |  |   |   |   |   |   |
|------------|---|--------------------------------|--------|------------------------------------------------------------------------------|----------|----------------------|------------------|--------------------------|--|---|---|---|---|---|--|---|--|---|---|---|---|---|
| arCOG06712 | T | Signal transduction mechanisms | AtoS   | Sensory protein, contains PAS domain                                         | COG02202 | pfam13426            | cd00130          | TIGR00229                |  |   |   |   |   | 1 |  | 1 |  | 1 |   | 3 |   |   |
| arCOG02333 | T | Signal transduction mechanisms | -      | Signal transduction histidine kinase, contains REC and PAS domains           | COG00642 | pfam13492, pfam0051  | cd00082, cd000   | TIGR02966                |  |   |   |   |   |   |  |   |  | 1 |   |   |   |   |
| arCOG04809 | T | Signal transduction mechanisms | -      | Signal transduction histidine kinase                                         | COG00642 | pfam00512, pfam0251  | cd00082, cd000   | TIGR02956                |  |   |   |   |   |   |  |   |  | 1 |   |   |   |   |
| arCOG01180 | T | Signal transduction mechanisms | RIO1   | Serine/threonine protein kinase involved in cell cycle control               | COG01718 | pfam01163            | cd05145          | TIGR03724                |  | 1 | 1 |   | 1 |   |  |   |  |   | 1 | 1 | 2 |   |
| arCOG04820 | T | Signal transduction mechanisms | -      | SOUL heme-binding protein                                                    |          | pfam04832            |                  |                          |  |   | 1 | 1 | 1 | 1 |  | 1 |  |   |   |   | 1 |   |
| arCOG06193 | T | Signal transduction mechanisms | -      | Signal transduction histidine kinase and PAS domains                         | COG00642 | pfam13426, pfam1342  | cd00130, cd001   | TIGR00229, TIGR00229, TI |  | 1 |   |   |   |   |  |   |  |   |   |   |   |   |
| arCOG04453 | T | Signal transduction mechanisms | DisA_N | Diadenylate cyclase (c-di-AMP synthetase), DisA_N domain                     | COG01624 | pfam02457            |                  |                          |  |   |   |   |   |   |  |   |  |   |   | 1 | 1 |   |
| arCOG03799 | T | Signal transduction mechanisms | AtoS   | GAF, PAS/PAC domains containing signal transduction protein                  | COG02202 | pfam05763            |                  |                          |  |   |   |   |   |   |  |   |  |   |   | 1 | 2 | 1 |
| arCOG00449 | T | Signal transduction mechanisms | UspA   | Nucleotide-binding protein, UspA family                                      | COG00589 | pfam00582, pfam0058  | cd00293, cd00293 |                          |  |   |   |   |   |   |  |   |  |   |   | 1 |   |   |
| arCOG01172 | T | Signal transduction mechanisms | RAD55  | RecA-superfamily ATPase implicated in signal transduction                    | COG00467 | pfam06745            |                  | TIGR03881                |  |   |   |   |   |   |  |   |  |   |   | 1 |   |   |
| arCOG01173 | T | Signal transduction mechanisms | RAD55  | RecA-superfamily ATPase implicated in signal transduction                    | COG00467 | pfam06745            | cd01393          | TIGR03880                |  |   |   |   |   |   |  |   |  |   |   | 1 |   |   |
| arCOG01174 | T | Signal transduction mechanisms | RAD55  | RecA-superfamily ATPase implicated in signal transduction                    | COG00467 | pfam06745            | cd01124          | TIGR03877                |  |   |   |   |   |   |  |   |  |   |   | 1 |   |   |
| arCOG02327 | T | Signal transduction mechanisms | -      | Signal transduction histidine kinase, contains PAS domain                    | COG00642 | pfam13426, pfam0251  | cd00130, cd000   | TIGR02966                |  |   |   |   |   |   |  |   |  |   |   | 1 |   |   |
| arCOG02385 | T | Signal transduction mechanisms | CheY   | Rec domain                                                                   | COG00784 | pfam00072            | cd00156          | TIGR01818                |  |   |   |   |   |   |  |   |  |   |   | 1 |   |   |
| arCOG03803 | T | Signal transduction mechanisms | -      | Membrane associated inactivated KaiC-like ATPase, DUF835 family              | SC00096  | pfam05763            |                  |                          |  |   |   |   |   |   |  |   |  |   |   | 1 |   |   |
| arCOG03804 | T | Signal transduction mechanisms | -      | Membrane associated inactivated KaiC-like ATPase, DUF835 family              | SC00096  | pfam05763            |                  |                          |  |   |   |   |   |   |  |   |  |   |   | 1 |   |   |
| arCOG04404 | T | Signal transduction mechanisms | -      | Cell fate regulator YlbF, YheA/YmCA/DUF963 family (controls sporulation, con | COG03679 | pfam06133            |                  |                          |  |   |   |   |   |   |  |   |  |   |   | 1 |   |   |
| arCOG06538 | T | Signal transduction mechanisms | -      | Signal transduction histidine kinase                                         | COG00642 |                      |                  |                          |  |   |   |   |   |   |  |   |  |   |   | 1 |   |   |
| arCOG01143 | T | Signal transduction mechanisms | ApaH   | Serine/threonine protein phosphatase PP2A family                             | COG00639 | pfam00149            | cd00144          |                          |  |   |   |   |   |   |  |   |  |   |   | 2 | 2 |   |
| arCOG01178 | T | Signal transduction mechanisms | GvpD   | GvpD gas vesicle protein, contains RecA/KaiC family ATPase domain            | COG00467 | pfam07088            | cd01124          | TIGR02655                |  |   |   |   |   |   |  |   |  |   |   | 2 |   |   |
| arCOG02391 | T | Signal transduction mechanisms | CheY   | Rec domain                                                                   | COG00784 | pfam00072            | cd00156          | TIGR02154                |  |   |   |   |   |   |  |   |  |   |   | 3 | 1 | 5 |
| arCOG03413 | T | Signal transduction mechanisms | CDC14  | Protein-tyrosine phosphatase                                                 | COG02453 | pfam00782            | cd00047          |                          |  |   |   |   |   |   |  |   |  |   |   | 1 |   |   |
| arCOG03517 | T | Signal transduction mechanisms | -      | Formylglycine-generating sulfatase enzyme                                    | COG01262 | pfam12867, pfam03781 |                  | TIGR03440                |  |   |   |   |   |   |  |   |  |   |   | 1 |   |   |
| arCOG00451 | T | Signal transduction mechanisms | UspA   | Nucleotide-binding protein, UspA family                                      | COG00589 |                      |                  |                          |  |   |   |   |   |   |  |   |  |   |   | 2 | 2 |   |
| arCOG01992 | T | Signal transduction mechanisms | SixA   | Phosphohistidine phosphatase SixA                                            | COG02062 | pfam00300            | cd07067          | TIGR00249                |  |   |   |   |   |   |  |   |  |   |   |   |   | 1 |
| arCOG04647 | T | Signal transduction mechanisms | BolA   | Stress-induced morphogen (activity unknown)                                  | COG00271 | pfam01722            |                  |                          |  |   |   |   |   |   |  |   |  |   |   |   |   | 1 |
| arCOG06801 | T | Signal transduction mechanisms | SrkA   | Ser/Thr protein kinase RdoA involved in Cpx stress response, MazF antagonist | COG02334 | pfam01636            | cd05153          |                          |  |   |   |   |   |   |  |   |  |   |   |   |   | 3 |

|                   |   |                                     |      |                                                                             |          |                      |         |           |   |   |   |   |   |   |   |   |   |   |  |   |   |   |   |
|-------------------|---|-------------------------------------|------|-----------------------------------------------------------------------------|----------|----------------------|---------|-----------|---|---|---|---|---|---|---|---|---|---|--|---|---|---|---|
| <b>METABOLISM</b> |   |                                     |      |                                                                             |          |                      |         |           |   |   |   |   |   |   |   |   |   |   |  |   |   |   |   |
| arCOG01768        | E | Amino acid transport and metabolism | GlpG | Membrane associated serine protease                                         | COG00705 | pfam01694            |         |           | 1 | 1 | 1 | 1 | 1 |   |   |   | 1 | 1 |  | 1 | 1 | 1 | 1 |
| arCOG04671        | E | Amino acid transport and metabolism | HutH | Histidine ammonia-lyase                                                     | COG02986 | pfam00221            | cd00332 | TIGR01225 | 1 | 1 | 1 | 1 | 1 |   |   |   | 1 | 1 |  | 1 | 1 | 1 | 3 |
| arCOG04247        | E | Amino acid transport and metabolism | YpwA | Zn-dependent carboxypeptidase, M32 family                                   | COG02317 | pfam02074            | cd06460 |           | 1 | 1 | 1 |   |   | 2 |   |   | 1 | 1 |  | 1 | 1 | 1 | 2 |
| arCOG01352        | E | Amino acid transport and metabolism | GdhA | Glutamate dehydrogenase/leucine dehydrogenase                               | COG00334 | pfam02812, pfam0020  | cd01076 |           | 1 | 1 | 1 |   |   |   |   |   | 1 | 1 |  | 1 | 1 | 1 | 2 |
| arCOG00751        | E | Amino acid transport and metabolism | DppB | ABC-type dipeptide/oligopeptide/nickel transport system, permease compon    | COG00601 | pfam00528            | cd06261 | TIGR02789 | 1 | 1 |   | 1 | 1 |   |   |   | 1 | 1 |  | 5 |   |   |   |
| arCOG03109        | E | Amino acid transport and metabolism | DdaH | N-Dimethylarginine dimethylaminohydrolase                                   | COG01834 | pfam02274            |         | TIGR01078 | 1 | 2 | 1 | 1 | 1 | 1 | 1 | 1 | 1 | 1 |  | 1 | 1 | 1 | 3 |
| arCOG06678        | E | Amino acid transport and metabolism | Ald  | Alanine dehydrogenase                                                       | COG00686 | pfam05222, pfam0126  | cd05304 | TIGR00561 | 1 | 2 | 1 | 1 | 1 | 1 | 1 | 1 | 1 | 1 |  | 1 | 1 | 5 |   |
| arCOG09400        | E | Amino acid transport and metabolism | PntB | NAD(P) transhydrogenase beta subunit                                        | COG01282 | pfam02233            |         |           | 1 | 2 | 1 | 1 | 1 | 1 | 1 | 1 | 1 | 1 |  |   | 1 | 5 |   |
| arCOG00184        | E | Amino acid transport and metabolism | AppF | ABC-type oligopeptide transport system, ATPase component                    | COG04608 | pfam00005            | cd03257 | TIGR02769 | 1 | 2 |   | 1 | 1 | 1 |   |   | 1 | 1 |  | 4 |   |   |   |
| arCOG01700        | E | Amino acid transport and metabolism | SpeB | Arginase family enzyme                                                      | COG00010 | pfam00491            | cd11593 | TIGR01230 | 1 |   |   |   |   |   | 1 | 1 | 1 | 1 |  | 1 | 1 | 3 |   |
| arCOG05395        | E | Amino acid transport and metabolism | FtcD | Formiminotetrahydrofolate cyclodeaminase                                    | COG03404 |                      |         |           | 1 |   | 1 |   |   |   |   |   | 1 | 1 |  | 1 | 2 | 5 |   |
| arCOG00181        | E | Amino acid transport and metabolism | DppD | ABC-type dipeptide/oligopeptide/nickel transport system, ATPase component   | COG00444 | pfam00005            | cd03257 | TIGR02770 | 1 |   | 1 | 1 |   |   |   |   | 1 | 1 |  | 4 |   |   |   |
| arCOG01430        | E | Amino acid transport and metabolism | CysK | Cysteine synthase                                                           | COG00031 | pfam00291            | cd01561 | TIGR01136 |   |   |   |   |   |   |   |   | 1 | 1 |  | 1 | 1 |   |   |
| arCOG00915        | E | Amino acid transport and metabolism | GabT | 4-aminobutyrate aminotransferase or related aminotransferase                | COG00160 | pfam00202            | cd00610 | TIGR00707 |   |   |   |   |   |   |   |   | 1 | 1 |  | 2 |   |   |   |
| arCOG00095        | E | Amino acid transport and metabolism | GlTB | Glutamate synthase domain 1                                                 | COG00067 | pfam00310            | cd01907 | TIGR01134 |   |   |   |   |   |   |   |   | 1 | 1 |  |   |   |   |   |
| arCOG04670        | E | Amino acid transport and metabolism | HutU | Urocanate hydratase                                                         | COG02987 | pfam01175            |         | TIGR01228 | 1 | 1 | 1 | 1 | 1 |   |   |   | 1 | 1 |  | 1 | 1 | 2 |   |
| arCOG01948        | E | Amino acid transport and metabolism | RhtB | Threonine efflux protein                                                    | COG01280 | pfam01810            |         | TIGR00949 | 1 | 1 | 1 | 1 | 1 |   |   |   | 1 | 1 |  | 1 | 1 | 2 |   |
| arCOG00243        | E | Amino acid transport and metabolism | LYS9 | Saccharopine dehydrogenase or related enzyme                                | COG01748 | pfam03435            |         |           | 1 | 1 | 1 | 1 | 1 |   |   |   | 1 | 1 |  |   | 1 | 3 |   |
| arCOG01158        | E | Amino acid transport and metabolism | SerB | Phosphoserine phosphatase                                                   | COG00560 | pfam00702            |         | TIGR01491 | 1 | 1 | 1 | 1 | 1 |   |   |   | 1 | 1 |  | 3 | 2 |   |   |
| arCOG01924        | E | Amino acid transport and metabolism | AnsB | L-asparaginase/archaeal Glu-tRNAGln amidotransferase subunit D              | COG00252 | pfam00710            | cd08962 | TIGR02153 | 1 | 1 |   |   |   |   |   |   | 1 | 1 |  | 1 | 1 | 2 |   |
| arCOG01888        | E | Amino acid transport and metabolism | AmpS | Leucyl aminopeptidase (aminopeptidase T)                                    | COG02309 | pfam02073            |         |           | 1 | 1 |   | 1 |   |   |   |   | 1 | 1 |  |   |   | 2 |   |
| arCOG04897        | E | Amino acid transport and metabolism | -    | Aspartate/tyrosine/aromatic aminotransferase                                | COG00436 | pfam00155            | cd00609 | TIGR01141 | 1 | 2 | 1 | 1 |   |   |   |   | 1 | 1 |  |   |   |   |   |
| arCOG00924        | E | Amino acid transport and metabolism | LivF | ABC-type branched-chain amino acid transport system, ATPase component       | COG00410 | pfam00005            | cd03224 | TIGR03410 | 1 | 2 |   |   | 1 |   |   |   |   |   |  | 1 | 1 |   |   |
| arCOG00925        | E | Amino acid transport and metabolism | LivG | ABC-type branched-chain amino acid transport system, ATPase component       | COG00411 | pfam00005            | cd03219 | TIGR03411 | 1 | 2 |   |   | 1 |   |   |   | 1 | 1 |  |   | 1 |   |   |
| arCOG01021        | E | Amino acid transport and metabolism | LivK | ABC-type branched-chain amino acid transport system, periplasmic compone    | COG00683 | pfam13458            | cd06268 |           | 1 | 2 |   |   |   |   |   |   | 1 | 1 |  |   | 1 | 1 |   |
| arCOG01273        | E | Amino acid transport and metabolism | LivM | ABC-type branched-chain amino acid transport system, permease component     | COG04177 | pfam02653            | cd06581 |           | 1 | 2 |   |   |   |   |   |   | 1 | 1 |  |   |   |   |   |
| arCOG00912        | E | Amino acid transport and metabolism | ArgF | Ornithine carbamoyltransferase                                              | COG00078 | pfam02729, pfam00185 |         | TIGR00658 | 1 |   | 1 | 1 | 1 | 1 | 1 | 1 | 1 | 1 |  | 1 | 1 |   |   |
| arCOG04758        | E | Amino acid transport and metabolism | PepF | Oligoendopeptidase F                                                        | COG01164 | pfam08439, pfam0143  | cd09608 | TIGR00181 | 1 |   | 1 | 1 | 1 | 1 | 1 | 1 | 1 | 1 |  |   |   | 1 |   |
| arCOG01646        | E | Amino acid transport and metabolism | DAP2 | Dipeptidyl aminopeptidase/acylaminoacyl-peptidase                           | COG01506 | pfam07859            | cd00312 |           | 3 | 2 | 3 | 2 |   |   |   |   | 1 | 1 |  | 2 | 5 |   |   |
| arCOG00071        | E | Amino acid transport and metabolism | AsnB | Asparagine synthase (glutamine-hydrolyzing)                                 | COG00367 | pfam00733            | cd01991 | TIGR01536 |   | 1 | 1 | 1 | 1 | 1 | 1 | 1 | 1 | 1 |  | 1 | 1 | 2 |   |
| arCOG00076        | E | Amino acid transport and metabolism | GcvP | Glycine cleavage system protein P (pyridoxal-binding), C-terminal domain    | COG01303 | pfam02347            | cd00613 | TIGR00461 |   | 1 | 1 | 1 |   |   |   |   | 1 | 1 |  | 1 | 1 | 1 |   |
| arCOG01319        | E | Amino acid transport and metabolism | PutP | Na+/proline symporter                                                       | COG00591 | pfam00474            | cd11474 | TIGR00813 |   | 1 | 1 |   |   |   |   |   |   |   |  |   |   | 1 |   |
| arCOG04779        | E | Amino acid transport and metabolism | IaaA | Isoaspartyl peptidase or L-asparaginase, Ntn-hydrolase superfamily          | COG01446 | pfam01112            | cd14950 |           |   | 1 |   |   |   |   |   |   |   |   |  | 1 | 1 | 1 |   |
| arCOG00863        | E | Amino acid transport and metabolism | ArcC | Carbamate kinase                                                            | COG00549 | pfam00696            | cd04235 | TIGR00746 |   |   |   |   |   |   |   |   | 1 | 1 |  | 1 | 1 | 4 |   |
| arCOG01534        | E | Amino acid transport and metabolism | DdpA | ABC-type transport system, periplasmic component                            | COG00747 | pfam00496            | cd08519 | TIGR02294 |   |   |   |   |   |   |   |   | 1 | 3 |  |   |   |   |   |
| arCOG04333        | E | Amino acid transport and metabolism | -    | Aspartate/tyrosine/aromatic aminotransferase                                | COG00436 | pfam00155            | cd00609 | TIGR03947 |   |   |   |   |   |   |   |   |   |   |  |   |   |   |   |
| arCOG00088        | E | Amino acid transport and metabolism | PuuD | Gamma-glutamyl-gamma-aminobutyrate hydrolase PuuD (putrescine degrad        | COG02071 | pfam07722            | cd01745 | TIGR00888 | 1 | 1 | 1 | 1 | 1 | 1 | 1 | 2 | 1 |   |  |   |   | 4 |   |
| arCOG00060        | E | Amino acid transport and metabolism | MetC | Cystathionine beta-lyase/cystathionine gamma-synthase                       | COG00626 | pfam01053            | cd00614 | TIGR02080 | 1 | 1 |   |   |   |   |   |   | 2 | 1 |  |   | 2 | 2 |   |
| arCOG01107        | E | Amino acid transport and metabolism | ArgE | Acetylornithine deacetylase/Succinyl-diaminopimelate desuccinylase or relat | COG00624 | pfam01546            | cd05650 |           |   |   | 2 |   |   |   |   |   |   |   |  | 2 |   |   |   |
| arCOG02706        | E | Amino acid transport and metabolism | GloA | Lactoylglutathione lyase or related enzyme                                  | COG00346 | pfam13669            | cd07249 | TIGR03081 | 2 | 1 |   |   |   | 1 | 1 | 2 | 2 | 2 |  | 1 | 1 | 1 |   |
| arCOG00096        | E | Amino acid transport and metabolism | GlTB | Glutamate synthase domain 3                                                 | COG00070 | pfam01493            | cd00981 | TIGR03122 | 1 | 1 | 1 | 1 | 1 |   | 1 | 2 |   |   |  |   |   | 1 |   |
| arCOG05229        | E | Amino acid transport and metabolism | PepD | Di- or tripeptidase                                                         | COG02195 |                      | cd03890 | TIGR01893 | 1 | 1 | 1 | 1 |   |   | 1 | 2 |   |   |  |   |   |   |   |
| arCOG02297        | E | Amino acid transport and metabolism | IlvE | Branched-chain amino acid aminotransferase/4-amino-4-deoxychorismate ly     | COG00115 | pfam01063            | cd01558 | TIGR01122 | 2 | 2 | 1 | 1 |   |   |   | 2 |   |   |  | 2 | 2 |   |   |
| arCOG01000        | E | Amino acid transport and metabolism | PepP | Xaa-Pro aminopeptidase                                                      | COG00006 | pfam01321, pfam0055  | cd01092 | TIGR00500 | 2 | 1 |   | 1 |   |   |   |   | 3 | 1 |  | 3 | 2 | 5 |   |
| arCOG01130        | E | Amino acid transport and metabolism | -    | Aspartate/tyrosine/aromatic aminotransferase                                | COG00436 | pfam00155            | cd00609 | TIGR03540 | 2 | 3 | 2 | 1 |   |   |   |   | 3 |   |  | 3 | 2 | 6 |   |
| arCOG04490        | E | Amino acid transport and metabolism | PdaD | Pyruvoyl-dependent arginine decarboxylase (PvArgDC)                         | COG01945 | pfam01862            |         | TIGR00286 | 1 | 1 | 1 |   |   |   |   |   |   |   |  |   |   |   |   |

|            |   |                                       |        |                                                                               |          |                      |                 |                      |   |   |   |   |   |   |   |  |   |   |   |
|------------|---|---------------------------------------|--------|-------------------------------------------------------------------------------|----------|----------------------|-----------------|----------------------|---|---|---|---|---|---|---|--|---|---|---|
| arCOG01431 | E | Amino acid transport and metabolism   | IlvA   | Threonine dehydratase                                                         | COG01171 | pfam00291            | cd01562,cd048   | TIGR01127            | 1 |   | 1 |   |   |   | 1 |  | 1 |   |   |
| arCOG00923 | E | Amino acid transport and metabolism   | GlnQ   | ABC-type polar amino acid transport system, ATPase component                  | COG01126 |                      | cd03262         | TIGR03005            |   |   |   |   |   |   | 1 |  | 1 |   | 2 |
| arCOG00771 | E | Amino acid transport and metabolism   | -      | CubicO group peptidase, beta-lactamase class C family                         | COG01680 | pfam00144            |                 |                      |   |   |   |   |   |   |   |  | 1 |   |   |
| arCOG01798 | E | Amino acid transport and metabolism   | HisM   | ABC-type amino acid transport system, permease component                      | COG00765 | pfam00528            | cd06261         | TIGR03003            |   |   |   |   |   |   | 2 |  |   |   | 3 |
| arCOG00914 | E | Amino acid transport and metabolism   | ArgD   | Ornithine/acetylornithine aminotransferase                                    | COG04992 | pfam00202            | cd00610         | TIGR00707            | 1 | 1 | 1 | 1 | 1 |   |   |  |   | 1 | 1 |
| arCOG01909 | E | Amino acid transport and metabolism   | GlnA   | Glutamine synthetase                                                          | COG00174 | pfam00120            |                 | TIGR03105            | 1 | 1 | 1 | 1 |   |   |   |  | 2 | 1 | 2 |
| arCOG00756 | E | Amino acid transport and metabolism   | GcvT   | Glycine cleavage system T protein (aminomethyltransferase)                    | COG00404 | pfam01571, pfam08669 |                 | TIGR00528            | 1 | 1 |   | 1 |   |   |   |  | 1 | 1 | 1 |
| arCOG01303 | E | Amino acid transport and metabolism   | GcvH   | Glycine cleavage system H protein (lipolate-binding)                          | COG00509 | pfam01597            | cd06848         | TIGR00527            | 1 | 1 |   |   |   |   |   |  | 1 | 2 | 5 |
| arCOG06322 | E | Amino acid transport and metabolism   | PutA   | Proline dehydrogenase                                                         | COG00506 | pfam01619            |                 |                      | 1 | 1 |   | 1 |   |   |   |  |   | 1 |   |
| arCOG00755 | E | Amino acid transport and metabolism   | DadA   | Glycine/D-amino acid oxidase (deaminating)                                    | COG00665 | pfam01266            |                 |                      | 1 | 1 |   |   |   |   |   |  | 1 |   | 2 |
| arCOG01947 | E | Amino acid transport and metabolism   | RhtB   | Threonine efflux protein                                                      | COG01280 | pfam01810            |                 |                      | 1 | 2 |   |   |   |   |   |  |   |   |   |
| arCOG01110 | E | Amino acid transport and metabolism   | ArgE   | Acetylornithine deacetylase/Succinyl-diaminopimelate desuccinylase or related | COG00624 | pfam01546            | cd05681         | TIGR01910            | 1 |   | 1 |   |   | 1 |   |  |   |   | 1 |
| arCOG02767 | E | Amino acid transport and metabolism   | -      | Metal-dependent membrane protease, CAAX family                                | COG01266 | pfam02517            |                 |                      | 1 |   | 1 |   |   |   | 1 |  |   |   |   |
| arCOG03600 | E | Amino acid transport and metabolism   | -      | Transglutaminase-like cysteine protease                                       | COG01305 |                      |                 |                      | 1 |   | 1 |   |   |   |   |  |   |   |   |
| arCOG00177 | E | Amino acid transport and metabolism   | PotA   | ABC-type spermidine/putrescine transport system, ATPase component             | COG03842 | pfam00005            | cd03301         | TIGR03265            | 1 |   |   | 1 |   |   |   |  |   |   | 1 |
| arCOG03101 | E | Amino acid transport and metabolism   | GloA   | Lactoylglutathione lyase or related enzyme                                    | COG00346 | pfam00903            | cd08346         |                      | 1 |   |   | 1 |   |   |   |  |   |   |   |
| arCOG14875 | E | Amino acid transport and metabolism   | -      | Aspartyl protease                                                             |          | pfam05618            |                 |                      | 1 |   |   |   | 1 |   |   |  |   |   | 1 |
| arCOG01316 | E | Amino acid transport and metabolism   | PutP   | Na+/proline symporter                                                         | COG00591 | pfam00474            | cd10322         | TIGR00813            | 2 | 1 |   |   |   |   |   |  | 1 | 1 | 3 |
| arCOG00027 | E | Amino acid transport and metabolism   | MfnA   | L-tyrosine decarboxylase, PLP-dependent protein                               | COG00076 | pfam00282            | cd06450         | TIGR03812            |   | 1 |   |   |   |   |   |  | 1 | 1 |   |
| arCOG07760 | E | Amino acid transport and metabolism   | -      | Peptidase family C25                                                          |          | pfam01364            | cd02258         |                      |   | 1 |   |   |   |   |   |  | 1 |   |   |
| arCOG01512 | E | Amino acid transport and metabolism   | HyyB   | N-methylhydantoinase B/acetone carboxylase, alpha subunit                     | COG00146 | pfam02538            |                 |                      |   | 1 |   |   |   |   |   |  |   |   |   |
| arCOG01949 | E | Amino acid transport and metabolism   | ArgO   | Lysine/arginine efflux permease                                               | COG01279 | pfam01810            |                 | TIGR00948            |   |   | 1 |   |   |   |   |  |   |   |   |
| arCOG05121 | E | Amino acid transport and metabolism   | TesA   | Lysophospholipase L1 or related esterase                                      | COG02755 |                      |                 |                      |   | 1 |   |   |   |   |   |  |   |   |   |
| arCOG00121 | E | Amino acid transport and metabolism   | AsnB   | Asparagine synthase [glutamine-hydrolyzing]                                   | COG00367 | pfam00733            |                 |                      |   |   |   | 1 |   |   |   |  |   |   |   |
| arCOG03999 | E | Amino acid transport and metabolism   | -      | Clostridia family peptidase, C11                                              |          | pfam03415            |                 | TIGR02806            |   |   | 1 |   |   |   |   |  |   |   |   |
| arCOG01269 | E | Amino acid transport and metabolism   | LivH   | Branched-chain amino acid ABC-type transport system, permease component       | COG00559 | pfam02653            | cd06582         | TIGR03409            |   |   |   |   | 1 |   |   |  |   |   | 1 |
| arCOG03611 | E | Amino acid transport and metabolism   | -      | Peptidase C1A subfamily                                                       |          |                      | cd08546,cd14254 |                      |   |   |   |   |   | 1 |   |  |   | 2 |   |
| arCOG01596 | E | Amino acid transport and metabolism   | CarB   | Carbamoylphosphate synthase large subunit                                     | COG00458 | pfam15632            |                 | TIGR01205            |   |   |   |   |   | 1 |   |  |   |   |   |
| arCOG00077 | E | Amino acid transport and metabolism   | GcvP   | Glycine cleavage system protein P (pyridoxal-binding), N-terminal domain      | COG00403 | pfam02347            | cd00613         | TIGR00461            |   |   |   |   |   |   |   |  | 1 | 1 | 1 |
| arCOG01434 | E | Amino acid transport and metabolism   | ThrC   | Threonine synthase and cysteine synthase                                      | COG00498 | pfam01155, pfam00029 | cd01563         | TIGR02605, TIGR00260 |   |   |   |   |   |   |   |  | 1 | 1 | 1 |
| arCOG00279 | E | Amino acid transport and metabolism   | SpeD   | S-adenosylmethionine decarboxylase/arginine decarboxylase                     | COG01586 | pfam02675            |                 | TIGR03330            |   |   |   |   |   |   |   |  | 1 | 1 | 2 |
| arCOG00073 | E | Amino acid transport and metabolism   | CysH   | PAPS reductase related enzyme fused to RNA-binding PUA domain and ferredoxin  | COG00175 | pfam01507            | cd01713         | TIGR00434            |   |   |   |   |   |   |   |  | 1 |   | 2 |
| arCOG00009 | E | Amino acid transport and metabolism   | PotE   | Amino acid transporter                                                        | COG00531 | pfam00324            |                 | TIGR00909            |   |   |   |   |   |   |   |  | 1 |   |   |
| arCOG00050 | E | Amino acid transport and metabolism   | SpeE   | Spermidine synthase                                                           | COG00421 | pfam01564            | cd02440         | TIGR00417            |   |   |   |   |   |   |   |  | 1 |   |   |
| arCOG00092 | E | Amino acid transport and metabolism   | LdcC   | Arginine/lysine/ornithine decarboxylase                                       | COG01982 | pfam03709, pfam0127  | cd00615         | TIGR04301            |   |   |   |   |   |   |   |  | 1 |   |   |
| arCOG00304 | E | Amino acid transport and metabolism   | HIS2   | Histidinol phosphatase or related hydrolase of the PHP family                 | COG01387 | pfam02811            | cd12110         | TIGR01856            |   |   |   |   |   |   |   |  | 1 |   |   |
| arCOG01123 | E | Amino acid transport and metabolism   | MtnA   | Methylthioribose-1-phosphate isomerase (methionine salvage pathway), a pe     | COG00182 | pfam01008            |                 | TIGR00512            |   |   |   |   |   |   |   |  | 1 |   |   |
| arCOG01292 | E | Amino acid transport and metabolism   | GlhD   | NADPH-dependent glutamate synthase beta chain or related oxidoreductase       | COG00493 | pfam07992            |                 | TIGR01316            |   |   |   |   |   |   |   |  | 1 |   |   |
| arCOG01647 | E | Amino acid transport and metabolism   | -      | Serine protease of the peptidase family S9A                                   | COG01505 | pfam00326            |                 |                      |   |   |   |   |   |   |   |  | 1 |   |   |
| arCOG01678 | E | Amino acid transport and metabolism   | MetK   | Archaeal S-adenosylmethionine synthetase                                      | COG01812 | pfam01941            |                 |                      |   |   |   |   |   |   |   |  | 1 |   |   |
| arCOG02167 | E | Amino acid transport and metabolism   | -      | Transglutaminase-like cysteine protease                                       | COG01305 | pfam01841            |                 |                      |   |   |   |   |   |   |   |  | 1 |   |   |
| arCOG02766 | E | Amino acid transport and metabolism   | -      | Metal-dependent membrane protease, CAAX family                                | COG01266 | pfam02517            |                 |                      |   |   |   |   |   |   |   |  | 1 |   |   |
| arCOG03602 | E | Amino acid transport and metabolism   | PepD   | Dipeptidase family C69                                                        | COG04690 | pfam03577            |                 |                      |   |   |   |   |   |   |   |  | 1 |   |   |
| arCOG03672 | E | Amino acid transport and metabolism   | -      | Thermoglysin-like protease                                                    | SC_00065 | pfam05317, pfam06832 |                 |                      |   |   |   |   |   |   |   |  | 1 |   |   |
| arCOG05065 | E | Amino acid transport and metabolism   | CdsB   | L-cysteine desulfidase                                                        | COG03681 | pfam03313            |                 |                      |   |   |   |   |   |   |   |  | 1 |   |   |
| arCOG05363 | E | Amino acid transport and metabolism   | -      | CAAX family protease, possibly associated with type IV pili like system       | COG01266 | pfam02517            |                 |                      |   |   |   |   |   |   |   |  | 1 |   |   |
| arCOG05808 | E | Amino acid transport and metabolism   | DUR1   | Allophanate hydrolase subunit 2                                               | COG01984 | pfam02626            |                 | TIGR00724            |   |   |   |   |   |   |   |  | 1 |   |   |
| arCOG05809 | E | Amino acid transport and metabolism   | DUR1   | Allophanate hydrolase subunit 1                                               | COG02049 | pfam02682            |                 | TIGR00370            |   |   |   |   |   |   |   |  | 1 |   |   |
| arCOG07546 | E | Amino acid transport and metabolism   | -      | Zincin superfamily protease                                                   |          |                      |                 |                      |   |   |   |   |   |   |   |  | 1 |   |   |
| arCOG10063 | E | Amino acid transport and metabolism   | SdaC   | Tryptophan/tyrosine permease family                                           | COG00814 | pfam03222            |                 | TIGR00837            |   |   |   |   |   |   |   |  | 1 |   |   |
| arCOG13501 | E | Amino acid transport and metabolism   | -      | Serine dehydratase beta chain                                                 |          | pfam03315            | cd04879         | TIGR00719            |   |   |   |   |   |   |   |  | 1 |   |   |
| arCOG00070 | E | Amino acid transport and metabolism   | GlyA   | Glycine/serine hydroxymethyltransferase                                       | COG00112 | pfam00464            | cd00378         |                      |   |   |   |   |   |   |   |  | 2 | 1 | 1 |
| arCOG01698 | E | Amino acid transport and metabolism   | LeuC   | Homoaconitate hydratase/3-isopropylmalate dehydratase large subunit fami      | COG00065 | pfam00330            | cd01583         | TIGR02086            |   |   |   |   |   |   |   |  | 3 | 1 | 4 |
| arCOG02230 | E | Amino acid transport and metabolism   | LeuD   | 3-isopropylmalate dehydratase small subunit                                   | COG00066 | pfam00694            | cd01577         | TIGR02087            |   |   |   |   |   |   |   |  | 3 |   |   |
| arCOG00748 | E | Amino acid transport and metabolism   | DppC   | ABC-type dipeptide/oligopeptide/nickel transport system, permease compon      | COG01173 | pfam12911, pfam0052  | cd06261         | TIGR02790            |   |   |   |   |   |   |   |  | 5 |   |   |
| arCOG00494 | E | Amino acid transport and metabolism   | Asd    | Aspartate-semialdehyde dehydrogenase                                          | COG00136 | pfam01118, pfam02774 |                 | TIGR00978            |   |   |   |   |   |   |   |  |   | 1 | 1 |
| arCOG02014 | E | Amino acid transport and metabolism   | TrpE   | Anthranyl/para-aminobenzoate synthase component I                             | COG00147 | pfam04715, pfam00425 |                 | TIGR01820            |   |   |   |   |   |   |   |  |   | 1 | 1 |
| arCOG02097 | E | Amino acid transport and metabolism   | AroD   | 3-dehydroquinate dehydratase                                                  | COG00710 | pfam01487            | cd00502         | TIGR01093            |   |   |   |   |   |   |   |  |   | 1 | 1 |
| arCOG04134 | E | Amino acid transport and metabolism   | AroA   | 5-enolpyruvylshikimate-3-phosphate synthase                                   | COG00128 | pfam00275            | cd01556         | TIGR01356            |   |   |   |   |   |   |   |  |   | 1 | 1 |
| arCOG06005 | E | Amino acid transport and metabolism   | -      | Predicted metalloprotease, contains C-terminal PDZ domain                     | COG03975 | pfam05299, pfam1318  | cd00990         | TIGR02037            |   |   |   |   |   |   |   |  |   | 1 | 1 |
| arCOG07384 | E | Amino acid transport and metabolism   | HisB   | Histidinol phosphatase or related phosphatase                                 | COG00241 | pfam13242            | cd01427         | TIGR01656            |   |   |   |   |   |   |   |  |   | 1 | 1 |
| arCOG01025 | E | Amino acid transport and metabolism   | AroK2  | Archaeal shikimate kinase                                                     | COG01685 | pfam00288            |                 | TIGR01920            |   |   |   |   |   |   |   |  |   | 1 | 2 |
| arCOG01131 | E | Amino acid transport and metabolism   | -      | Aspartate/tyrosine/aromatic aminotransferase                                  | COG00436 | pfam00155            | cd00609         | TIGR01265            |   |   |   |   |   |   |   |  |   | 1 | 2 |
| arCOG04133 | E | Amino acid transport and metabolism   | AroC   | Chorismate synthase                                                           | COG00082 | pfam01264            | cd07304         | TIGR00033            |   |   |   |   |   |   |   |  |   | 1 | 2 |
| arCOG04353 | E | Amino acid transport and metabolism   | -      | 3-dehydroquinate synthase                                                     | COG01465 | pfam01959            |                 |                      |   |   |   |   |   |   |   |  |   | 1 | 2 |
| arCOG02092 | E | Amino acid transport and metabolism   | LeuA   | Isopropylmalate/homocitrate/citramalate synthase                              | COG00119 | pfam00682, pfam0103  | cd07940         | TIGR02146            |   |   |   |   |   |   |   |  |   | 1 | 3 |
| arCOG04322 | E | Amino acid transport and metabolism   | PepB   | Leucyl aminopeptidase                                                         | COG00260 | pfam02789, pfam0088  | cd00433         |                      |   |   |   |   |   |   |   |  |   | 1 | 3 |
| arCOG01890 | E | Amino acid transport and metabolism   | AmpS   | Leucyl aminopeptidase (aminopeptidase T)                                      | COG02309 | pfam02073            |                 |                      |   |   |   |   |   |   |   |  |   | 1 | 4 |
| arCOG00861 | E | Amino acid transport and metabolism   | LysC   | Aspartokinase                                                                 | COG00527 |                      |                 |                      |   |   |   |   |   |   |   |  |   | 1 |   |
| arCOG01459 | E | Amino acid transport and metabolism   | Tdh    | Threonine dehydrogenase or related Zn-dependent dehydrogenase                 | COG01063 | pfam08240, pfam0010  | cd08235         | TIGR00692            |   |   |   |   |   |   |   |  |   | 1 |   |
| arCOG02769 | E | Amino acid transport and metabolism   | -      | Metal-dependent membrane protease, CAAX family                                | COG01266 | pfam02517            |                 |                      |   |   |   |   |   |   |   |  |   |   |   |
| arCOG04044 | E | Amino acid transport and metabolism   | -      | 2-amino-3,7-dideoxy-D-threo-hept-6-ulonic acid synthase, DhnaA-aldolase f     | COG01830 | pfam01791            | cd00958         | TIGR01949            |   |   |   |   |   |   |   |  | 2 |   | 4 |
| arCOG00619 | E | Amino acid transport and metabolism   | GitB   | Glutamate synthase domain 2 and ferredoxin domain                             | COG00069 | pfam01645            | cd02808         |                      |   |   |   |   |   |   |   |  |   |   | 1 |
| arCOG01033 | E | Amino acid transport and metabolism   | AroE   | Shikimate 5-dehydrogenase                                                     | COG00169 | pfam08501, pfam0148  | cd01065         | TIGR00507            |   |   |   |   |   |   |   |  |   |   | 1 |
| arCOG01799 | E | Amino acid transport and metabolism   | HisJ   | ABC-type amino acid transport/signal transduction system, periplasmic comp    | COG00834 | pfam00497            | cd13624         | TIGR01096            |   |   |   |   |   |   |   |  |   |   | 1 |
| arCOG04273 | E | Amino acid transport and metabolism   | HisC   | Histidinol-phosphate/aromatic aminotransferase or cobyrinic acid decarboxylas | COG00079 | pfam00155            | cd00609         | TIGR01140            |   |   |   |   |   |   |   |  |   |   | 1 |
| arCOG00757 | E | Amino acid transport and metabolism   | GcvT   | Glycine cleavage system T protein (aminomethyltransferase)                    | COG00404 | pfam01571, pfam08669 |                 | TIGR00528            |   |   |   |   |   |   |   |  |   |   | 2 |
| arCOG01122 | G | Carbohydrate transport and metabolism | RpiA   | Ribose 5-phosphate isomerase                                                  | COG00120 | pfam06026            | cd01398         | TIGR00021            | 1 | 1 |   | 1 |   |   | 1 |  | 1 | 1 | 3 |
| arCOG00767 | G | Carbohydrate transport and metabolism | {ManB} | Phosphomannomutase                                                            | COG01109 | pfam02878, pfam0287  | cd03087         | TIGR03990            |   |   |   |   | 1 |   | 1 |  | 1 | 3 | 3 |
| arCOG00493 | G | Carbohydrate transport and metabolism | GapA   | Glyceraldehyde-3-phosphate dehydrogenase/erythrose-4-phosphate dehydrog       | COG00057 | pfam00044, pfam02800 |                 | TIGR01546            | 1 |   | 1 |   |   |   | 1 |  | 1 | 1 | 2 |
| arCOG00052 | G | Carbohydrate transport and metabolism | Pgi    | Glucose-6-phosphate isomerase                                                 | COG00166 | pfam01380, pfam1043  | cd05017, cd050  | TIGR02128            | 1 |   | 1 |   |   |   | 1 |  | 1 | 1 | 1 |



|            |   |                                   |       |                                                                              |           |                                 |                  |                      |   |   |   |   |   |   |   |   |   |   |   |
|------------|---|-----------------------------------|-------|------------------------------------------------------------------------------|-----------|---------------------------------|------------------|----------------------|---|---|---|---|---|---|---|---|---|---|---|
| arCOG03838 | H | Coenzyme transport and metabolism | PqqD  | Coenzyme PQQ synthesis protein D                                             |           | pfam05402                       |                  |                      | 1 | 1 | 1 | 1 | 1 | 1 | 2 | 1 |   | 1 |   |
| arCOG00069 | H | Coenzyme transport and metabolism | NadE  | NH3-dependent NAD+ synthetase                                                | COG00171  | pfam02540                       | cd00553          | TIGR00552            | 1 | 2 | 1 | 1 | 1 | 1 | 2 | 1 | 1 | 1 | 3 |
| arCOG01726 | H | Coenzyme transport and metabolism | IsaA  | Geranylgeranyl pyrophosphate synthase                                        | COG00142  | pfam00348                       | cd00685          | TIGR02748            | 2 | 2 | 2 | 2 | 1 | 1 | 2 | 1 | 1 | 2 | 5 |
| arCOG01942 | H | Coenzyme transport and metabolism | LipB  | Lipote-protein ligase B                                                      | COG00321  | pfam03099                       |                  | TIGR00214            | 1 | 1 | 1 | 1 | 1 | 1 | 2 |   |   | 1 | 2 |
| arCOG00660 | H | Coenzyme transport and metabolism | LipA  | Lipote synthase                                                              | COG00320  | pfam04055                       | cd01335          | TIGR00510            | 1 | 1 |   | 1 |   |   | 2 |   |   | 1 | 2 |
| arCOG01904 | H | Coenzyme transport and metabolism | -     | CTP-dependent Riboflavin kinase                                              | COG01339  | pfam13412, pfam14277, pfam01982 |                  |                      | 2 | 1 | 1 |   | 1 |   | 2 |   | 1 | 1 | 2 |
| arCOG00480 | H | Coenzyme transport and metabolism | MenA  | 1,4-dihydroxy-2-naphthoate octaprenyltransferase                             | COG01575  | pfam01040                       | cd13962          | TIGR02235            | 1 | 1 | 1 | 1 | 1 |   |   | 1 |   |   |   |
| arCOG00489 | H | Coenzyme transport and metabolism | PduO  | Cob(l)alamin adenosyltransferase                                             | COG02096  | pfam01923                       |                  | TIGR00636            | 1 | 1 | 1 |   |   | 1 |   | 1 |   | 1 |   |
| arCOG02172 | H | Coenzyme transport and metabolism | QueD  | 6-pyruvoyl-tetrahydropterin synthase                                         | COG00720  | pfam01242                       | cd00470          | TIGR03367            | 1 | 1 |   | 1 |   |   |   | 1 | 1 | 1 | 1 |
| arCOG01045 | H | Coenzyme transport and metabolism | CoaE  | Dephospho-CoA kinase                                                         | COG00237  |                                 | cd02022          |                      | 1 | 1 |   | 1 |   |   |   | 1 | 1 | 1 | 2 |
| arCOG02817 | H | Coenzyme transport and metabolism | FolC  | Folypolyglutamate synthase and Dihydropteroate synthase                      | COG00285  | pfam08245, pfam0287             | cd00739          | TIGR01499, TIGR01496 | 1 | 1 | 1 | 1 |   | 1 |   | 1 | 2 | 1 | 1 |
| arCOG01704 | H | Coenzyme transport and metabolism | Dfp   | Phosphopantothencystine synthetase/decarboxylase                             | COG00452  | pfam02441, pfam04127            |                  | TIGR00521            |   |   |   | 1 |   |   |   | 1 | 1 | 1 | 2 |
| arCOG00214 | H | Coenzyme transport and metabolism | MoaB  | Molybdopterin biosynthesis enzyme                                            | COG00521  | pfam00994                       | cd00886          | TIGR02667            |   |   |   |   |   |   |   | 1 | 1 | 1 | 2 |
| arCOG00534 | H | Coenzyme transport and metabolism | MoaE  | Molybdopterin converting factor, large subunit                               | COG00314  | pfam02391                       | cd00756          |                      |   |   |   |   |   |   |   | 1 | 1 | 1 | 4 |
| arCOG00930 | H | Coenzyme transport and metabolism | MoaA  | Molybdenum cofactor biosynthesis enzyme                                      | COG02896  | pfam04055, pfam0646             | cd01335          | TIGR02668            |   |   |   |   |   |   |   | 1 | 1 | 1 | 4 |
| arCOG01530 | H | Coenzyme transport and metabolism | MoaC  | Molybdenum cofactor biosynthesis enzyme                                      | COG00315  | pfam01967                       | cd01419          | TIGR00581            |   |   |   |   |   |   |   | 1 | 1 | 1 | 4 |
| arCOG01872 | H | Coenzyme transport and metabolism | MobA  | Molybdopterin-guanine dinucleotide biosynthesis protein A                    | COG00746  | pfam12804                       | cd02503          |                      |   |   |   |   |   |   |   | 1 | 1 | 1 | 2 |
| arCOG00217 | H | Coenzyme transport and metabolism | MoeA  | Molybdopterin biosynthesis enzyme                                            | COG00303  | pfam03453, pfam0099             | cd00887          | TIGR00177            |   |   |   |   |   |   |   | 1 | 1 | 1 | 4 |
| arCOG02199 | H | Coenzyme transport and metabolism | Mcr1  | NAD(P)H-flavin reductase                                                     | COG00543  |                                 |                  |                      |   |   |   |   |   |   |   | 1 | 3 |   |   |
| arCOG04263 | H | Coenzyme transport and metabolism | -     | Pantoate kinase                                                              | COG01829  | pfam00288                       |                  |                      | 1 | 1 | 1 | 1 |   |   |   |   | 1 | 1 | 2 |
| arCOG00021 | H | Coenzyme transport and metabolism | -     | Predicted transcriptional regulator fused phosphomethylpyrimidine kinase, in | COG01992  | pfam10120                       |                  |                      | 1 | 1 | 1 | 1 |   |   |   |   | 1 | 1 |   |
| arCOG04075 | H | Coenzyme transport and metabolism | SNZ1  | Pyridoxine biosynthesis enzyme                                               | COG00214  | pfam01680, pfam0569             | cd04727          | TIGR00343            | 1 | 2 |   |   |   |   |   |   | 1 | 1 | 3 |
| arCOG00226 | H | Coenzyme transport and metabolism | TbpA  | ABC-type thiamine transport system, periplasmic component                    | COG04143  | pfam13343                       | cd13545          | TIGR01254            | 1 |   |   | 1 |   |   |   |   | 1 | 1 |   |
| arCOG01589 | H | Coenzyme transport and metabolism | RimK  | Glutathione synthase/glutaminyl transferase/alpha-L-glutamate ligase         | COG00189  | pfam08443                       |                  | TIGR02144            | 1 |   |   |   | 1 |   |   |   |   | 1 | 2 |
| arCOG04813 | H | Coenzyme transport and metabolism | PanD  | Aspartate 1-decarboxylase                                                    | COG00853  | pfam02261                       | cd06919          | TIGR00223            | 1 |   |   |   |   |   |   |   |   | 1 |   |
| arCOG03402 | H | Coenzyme transport and metabolism | MtbC1 | Methanogenic corrinoid protein MtbC1                                         | COG05012  | pfam02607, pfam0231             | cd02065          | TIGR02370            | 1 |   |   |   |   |   |   |   |   |   |   |
| arCOG04542 | H | Coenzyme transport and metabolism | FolE  | GTP cyclohydrolase I                                                         | COG00302  | pfam01227                       | cd00642          | TIGR00063            |   |   | 1 |   |   |   |   |   |   | 1 | 1 |
| arCOG01522 | H | Coenzyme transport and metabolism | HemY  | Protoporphyrinogen oxidase                                                   | COG01232  | pfam01593                       |                  | TIGR00562            |   |   | 1 |   |   |   |   |   |   |   |   |
| arCOG01676 | H | Coenzyme transport and metabolism | ThiF  | Dinucleotide-utilizing enzyme involved in molybdopterin and thiamine biosyn  | COG00476  | pfam00899, pfam0523             | cd00757          | TIGR02356            |   |   |   |   |   |   |   |   | 1 | 1 | 2 |
| arCOG01348 | H | Coenzyme transport and metabolism | nadF  | NAD kinase                                                                   | COG00061  | pfam01513                       |                  |                      |   |   |   |   |   |   |   |   | 1 | 1 |   |
| arCOG01754 | H | Coenzyme transport and metabolism | SerA  | Phosphoglycerate dehydrogenase or related dehydrogenase                      | COG00111  | pfam00389                       | cd05303          | TIGR01327            |   |   |   |   |   |   |   |   | 1 | 1 |   |
| arCOG00020 | H | Coenzyme transport and metabolism | ThiD  | Hydroxymethylpyrimidine/phosphomethylpyrimidine kinase                       | COG00351  | pfam08543                       | cd01169          | TIGR00097            |   |   |   |   |   |   |   |   |   |   |   |
| arCOG00117 | H | Coenzyme transport and metabolism | MenG  | Demethylmenaquinone methyltransferase                                        | COG00684  | pfam00215, pfam0373             | cd04726          | TIGR03128, TIGR01935 |   |   |   |   |   |   |   |   | 1 |   |   |
| arCOG00228 | H | Coenzyme transport and metabolism | MopI  | Molybdopterin-binding protein                                                | COG03585  | pfam03459                       |                  | TIGR00638            |   |   |   |   |   |   |   |   | 1 |   |   |
| arCOG00532 | H | Coenzyme transport and metabolism | MobB  | Molybdopterin-guanine dinucleotide biosynthesis protein                      | COG01763  | pfam03205                       | cd03116          | TIGR00176            |   |   |   |   |   |   |   |   | 1 |   |   |
| arCOG00574 | H | Coenzyme transport and metabolism | Thi4  | Archaeal ribulose 1,5-bisphosphate synthetase/yeast thiazole synthase        | COG01635  | pfam01946                       |                  | TIGR00292            |   |   |   |   |   |   |   |   | 1 |   |   |
| arCOG00613 | H | Coenzyme transport and metabolism | LldD  | FMN-dependent dehydrogenase, includes L-lactate dehydrogenase and type       | COG01304  | pfam01070                       | cd02811          | TIGR02151            |   |   |   |   |   |   |   |   | 1 |   |   |
| arCOG00638 | H | Coenzyme transport and metabolism | ThiL  | Thiamine monophosphate kinase                                                | COG00611  | pfam00586                       | cd02194          | TIGR01379            |   |   |   |   |   |   |   |   | 1 |   |   |
| arCOG01089 | H | Coenzyme transport and metabolism | ThiE  | Thiamine monophosphate synthase                                              | COG00352  | pfam02581                       | cd00564          | TIGR00693            |   |   |   |   |   |   |   |   | 1 |   |   |
| arCOG01322 | H | Coenzyme transport and metabolism | RibC2 | Archaeal riboflavin synthase                                                 | COG01731  | pfam00885                       | cd09210          | TIGR01506            |   |   |   |   |   |   |   |   | 1 |   |   |
| arCOG01481 | H | Coenzyme transport and metabolism | PncB  | Nicotinic acid phosphoribosyltransferase                                     | COG01488  | pfam02749, pfam0172             | cd01571          | TIGR01513            |   |   |   |   |   |   |   |   | 1 |   |   |
| arCOG01939 | H | Coenzyme transport and metabolism | LplA  | Lipote-protein ligase A                                                      | COG00095  | pfam03099                       |                  | TIGR00545            |   |   |   |   |   |   |   |   | 1 |   |   |
| arCOG02741 | H | Coenzyme transport and metabolism | ThiC  | Thiamine biosynthesis protein ThiC                                           | COG00422  | pfam01964                       |                  | TIGR00190            |   |   |   |   |   |   |   |   | 1 |   |   |
| arCOG03837 | H | Coenzyme transport and metabolism | -     | Lipote-protein ligase A associated domain                                    | COG00095  |                                 |                  |                      |   |   |   |   |   |   |   |   | 1 |   |   |
| arCOG04301 | H | Coenzyme transport and metabolism | MptA  | Fe(2+) dependent GTP cyclohydrolase                                          | COG01469  | pfam02649                       |                  | TIGR00294            |   |   |   |   |   |   |   |   | 1 |   |   |
| arCOG04536 | H | Coenzyme transport and metabolism | ArfB  | Creatinine amidohydrolase/Fe(II)-dependent formamide hydrolase involved in   | COG01402  | pfam02633                       |                  | TIGR03964            |   |   |   |   |   |   |   |   | 1 |   |   |
| arCOG04678 | H | Coenzyme transport and metabolism | BtuR  | ATP-corrinoid adenosyltransferase                                            | COG02109  | pfam02572                       | cd00561          | TIGR00708            |   |   |   |   |   |   |   |   | 1 |   |   |
| arCOG00536 | H | Coenzyme transport and metabolism | MoaD  | Molybdopterin converting factor, small subunit                               | COG01977  | pfam02391                       | cd00754, cd00756 |                      |   |   |   |   |   |   |   |   | 2 |   |   |
| arCOG02250 | H | Coenzyme transport and metabolism | EcfT  | Energy-coupling factor transporter transmembrane protein EcfT                | COG00619  |                                 |                  |                      |   |   |   |   |   |   |   |   | 2 |   |   |
| arCOG01485 | H | Coenzyme transport and metabolism | RibD  | Pyrimidine deaminase and reductase                                           | COG00117  | pfam00383, pfam0187             | cd01284          | TIGR00326            |   |   |   |   |   |   |   |   |   | 1 | 1 |
| arCOG01873 | H | Coenzyme transport and metabolism | MobA  | GT-A family glycosyltransferase involved in molybdopterin guanine dinucleot  | COG02068  | pfam12804                       | cd04182          | TIGR03310            |   |   |   |   |   |   |   |   | 1 | 1 |   |
| arCOG04348 | H | Coenzyme transport and metabolism | UbiE  | Ubiquinone/menaquinone biosynthesis C-methylase UbiE                         | COG02226  | pfam08241                       |                  | TIGR01934            |   |   |   |   |   |   |   |   | 1 | 1 |   |
| arCOG00477 | H | Coenzyme transport and metabolism | UbiA  | 4-hydroxybenzoate poly(prenyl)transferase or related prenyltransferase       | COG00382  | pfam01040                       | cd13959          | TIGR01475            |   |   |   |   |   |   |   |   | 1 | 2 |   |
| arCOG00572 | H | Coenzyme transport and metabolism | NadB  | Aspartate oxidase                                                            | COG00029  | pfam00890, pfam02910            |                  | TIGR00551            |   |   |   |   |   |   |   |   | 1 | 4 |   |
| arCOG02624 | H | Coenzyme transport and metabolism | PaaK  | Coenzyme F390 synthetase                                                     | COG01541  |                                 |                  | TIGR02304            |   |   |   |   |   |   |   |   | 1 |   |   |
| arCOG00656 | H | Coenzyme transport and metabolism | ThiH  | Thiamine biosynthesis enzyme ThiH, FO synthase or related uncharacterized    | COG01060  | pfam04055                       |                  | TIGR00423            |   |   |   |   |   |   |   |   | 2 | 7 |   |
| arCOG04299 | H | Coenzyme transport and metabolism | HemC  | Prophobilinogen deaminase                                                    | COG00181  | pfam01379, pfam0390             | cd13644          | TIGR00212            |   |   |   |   |   |   |   |   | 1 |   |   |
| arCOG01548 | C | Energy production and conversion  | NuoD  | NADH dehydrogenase subunit D                                                 | COG00649  | pfam00346                       |                  | TIGR01962            | 1 | 1 | 1 | 1 | 1 |   | 1 | 1 | 1 | 1 | 3 |
| arCOG01551 | C | Energy production and conversion  | NuoC  | NADH dehydrogenase subunit C                                                 | COG00852  | pfam00329                       |                  | TIGR01961            | 1 | 1 | 1 | 1 |   | 1 | 1 | 1 | 1 | 1 | 3 |
| arCOG01554 | C | Energy production and conversion  | NuoB  | F420H2 dehydrogenase subunit, related to NADH:ubiquinone oxidoreductase      | COG00377  | pfam01058                       |                  | TIGR01957            | 1 | 1 | 1 | 1 |   | 1 | 1 | 1 | 1 | 1 | 3 |
| arCOG01543 | C | Energy production and conversion  | NuoI  | NADH dehydrogenase subunit I                                                 | COG01143  | pfam12838                       |                  | TIGR01971            | 1 | 1 | 1 | 1 |   | 1 | 1 | 2 | 1 | 2 |   |
| arCOG01538 | C | Energy production and conversion  | NuoM  | NADH dehydrogenase subunit M                                                 | COG01008  | pfam00361                       |                  | TIGR01972            | 1 | 1 | 1 | 1 |   | 1 | 1 | 1 | 1 | 2 |   |
| arCOG01539 | C | Energy production and conversion  | NuoL  | NADH dehydrogenase subunit L                                                 | COG01009  | pfam00662, pfam00361            |                  | TIGR01974            | 1 | 1 | 1 | 1 |   | 1 | 1 | 1 | 1 | 2 |   |
| arCOG01540 | C | Energy production and conversion  | NuoN  | NADH dehydrogenase subunit N                                                 | COG01007  | pfam00361                       |                  | TIGR01770            | 1 | 1 | 1 | 1 |   | 1 | 1 | 1 | 1 | 2 |   |
| arCOG03073 | C | Energy production and conversion  | NuoK  | NADH dehydrogenase subunit 4L (K,kappa)                                      | COG00713  |                                 |                  |                      | 1 | 1 | 1 | 1 |   | 1 | 1 | 1 | 1 | 2 |   |
| arCOG04654 | C | Energy production and conversion  | NuoJ  | NADH dehydrogenase subunit J                                                 | COG00839  |                                 |                  |                      | 1 | 1 | 1 | 1 |   | 1 | 1 | 1 | 1 | 2 |   |
| arCOG01546 | C | Energy production and conversion  | NuoH  | NADH dehydrogenase subunit H                                                 | COG01005  | pfam00146                       |                  |                      | 1 | 1 | 1 | 1 |   | 1 | 1 | 1 | 1 | 3 |   |
| arCOG01557 | C | Energy production and conversion  | NuoA  | NADH dehydrogenase subunit A                                                 | COG00838  |                                 |                  |                      | 1 | 1 | 1 | 1 |   | 1 | 1 | 1 | 1 | 3 |   |
| arCOG02095 | C | Energy production and conversion  | OadA1 | Pyruvate/oxaloacetate carboxyltransferase                                    | COG05016  | pfam00682, pfam0243             | cd07937          | TIGR01108            | 1 | 1 | 1 | 1 | 1 | 1 | 1 | 1 | 2 | 2 | 3 |
| arCOG09401 | C | Energy production and conversion  | -     | NAD(P) transhydrogenase, subunit alpha                                       | pfam12769 |                                 |                  | TIGR00561            | 1 | 2 | 1 | 1 | 1 | 1 | 1 | 1 | 1 | 1 | 5 |
| arCOG01697 | C | Energy production and conversion  | AcnA  | Acconitase A                                                                 | COG01048  | pfam00330, pfam0069             | cd01586, cd015   | TIGR01341            | 1 | 2 | 1 | 1 | 1 | 2 | 1 | 1 | 1 | 1 | 1 |
| arCOG06720 | C | Energy production and conversion  | FixC  | Dehydrogenase (flavoprotein)                                                 | COG00644  |                                 |                  |                      | 1 |   | 1 | 1 | 1 | 1 | 1 | 1 |   | 1 | 4 |
| arCOG04138 | C | Energy production and conversion  | NtpI  | Archaeal/vacuolar-type H+-ATPase subunit I                                   | COG01269  | pfam01496                       |                  |                      | 1 |   | 1 | 1 |   | 1 | 1 | 1 | 1 | 1 | 2 |
| arCOG01721 | C | Energy production and conversion  | QcrB  | Cytochrome b subunit of the bc complex                                       | COG01290  | pfam13631                       | cd00284          |                      | 1 |   | 1 | 1 | 1 | 2 | 1 | 1 | 1 | 1 | 2 |
| arCOG00869 | C | Energy production and conversion  | NtpE  | Archaeal/vacuolar-type H+-ATPase subunit E                                   | COG01390  |                                 |                  |                      | 1 |   |   | 1 |   |   | 1 | 1 | 1 | 1 | 1 |
| arCOG02455 | C | Energy production and conversion  | AtpK  | Archaeal/vacuolar-type Na+/H+-ATPase, subunit K                              | COG00636  |                                 |                  |                      | 1 |   |   |   |   |   | 1 | 1 | 1 | 1 | 1 |
| arCOG02459 | C | Energy production and conversion  | NtpC  | Archaeal/vacuolar-type H+-ATPase subunit C                                   | COG01527  |                                 |                  |                      | 1 |   |   |   |   |   | 1 | 1 | 1 | 1 | 1 |
| arCOG04102 | C | Energy production and conversion  | NtpG  | Archaeal/vacuolar-type H+-ATPase subunit F                                   | COG01436  | pfam01990                       |                  |                      | 1 |   |   | 1 |   |   | 1 | 1 | 1 | 1 | 1 |
| arCOG00865 | C | Energy production and conversion  | NtpB  | Archaeal/vacuolar-type H+-ATPase subunit B                                   | COG01156  | pfam02874, pfam0000             | cd01135          | TIGR01041            | 1 |   |   |   |   |   | 1 | 1 | 1 | 1 | 1 |
| arCOG00868 | C | Energy production and conversion  | NtpA  | Archaeal/vacuolar-type H+-ATPase subunit A                                   | COG01155  | pfam02874, pfam0000             | cd01134          | TIGR01043            | 1 |   |   |   |   |   | 1 | 1 | 1 | 1 | 1 |
| arCOG02200 | C | Energy production and conversion  | Fpr   | Flavodoxin reductase (ferredoxin-NADPH reductase) family 1                   | COG01018  |                                 | cd00322          | TIGR01941            |   |   |   | 1 |   |   | 1 | 1 |   | 1 |   |

|            |   |                                  |       |                                                                                   |          |                                            |                |                      |   |   |   |   |   |   |   |  |  |   |   |   |   |    |
|------------|---|----------------------------------|-------|-----------------------------------------------------------------------------------|----------|--------------------------------------------|----------------|----------------------|---|---|---|---|---|---|---|--|--|---|---|---|---|----|
| arCOG00982 | C | Energy production and conversion | GldA  | Glycerol dehydrogenase or related enzyme                                          | COG00371 | pfam13685                                  | cd08173        | TIGR01357            |   |   |   |   |   |   |   |  |  | 1 | 1 | 1 |   |    |
| arCOG01755 | C | Energy production and conversion | LdhA  | Lactate dehydrogenase or related 2-hydroxyacid dehydrogenase                      | COG01052 | pfam00389                                  | cd05301        | TIGR01327            |   |   |   |   |   |   |   |  |  | 1 | 1 | 2 |   |    |
| arCOG02460 | C | Energy production and conversion | NapF  | Ferredoxin                                                                        | COG01145 | pfam09383, pfam1283                        | cd07030        | TIGR02314, TIGR04041 |   |   |   |   |   |   |   |  |  | 1 | 1 |   |   |    |
| arCOG01749 | C | Energy production and conversion | FumC  | Fumarase                                                                          | COG00114 | pfam00206, pfam1041                        | cd01596        | TIGR00979            | 1 | 1 |   |   |   |   |   |  |  | 1 | 2 |   | 1 | 1  |
| arCOG01337 | C | Energy production and conversion | SucC  | Succinyl-CoA synthetase, beta subunit                                             | COG00045 | pfam08442, pfam00549                       |                | TIGR01016            | 1 | 1 | 1 | 1 |   |   |   |  |  | 1 |   | 1 | 1 | 1  |
| arCOG01339 | C | Energy production and conversion | SucD  | Succinyl-CoA synthetase, alpha subunit                                            | COG00074 | pfam02629, pfam00549                       |                | TIGR01019            | 1 | 1 | 1 | 1 |   |   |   |  |  | 1 |   | 1 | 1 | 1  |
| arCOG01052 | C | Energy production and conversion | AcoB  | Pyruvate/2-oxoglutarate/acetyl dehydrogenase complex, dehydrogenase (E)           | COG00022 | pfam02779, pfam0278                        | cd07036        | TIGR00204            | 1 | 1 | 1 | 1 |   |   |   |  |  | 1 |   | 1 | 2 |    |
| arCOG05014 | C | Energy production and conversion | HdrE  | CoB-CoM heterodisulfide reductase subunit E                                       | COG02181 |                                            |                |                      | 1 | 1 | 1 |   | 1 |   |   |  |  | 1 |   | 1 | 2 |    |
| arCOG01054 | C | Energy production and conversion | AcoA  | Pyruvate/2-oxoglutarate/acetyl dehydrogenase complex, dehydrogenase (E)           | COG01071 | pfam00676                                  | cd02000        | TIGR03181            | 1 | 1 |   | 1 |   |   |   |  |  | 1 |   | 2 | 5 |    |
| arCOG06073 | C | Energy production and conversion | PckA  | Phosphoenolpyruvate carboxykinase (ATP)                                           | COG01866 | pfam01293                                  | cd00484        | TIGR00224            | 1 | 2 | 1 |   |   |   |   |  |  | 1 |   | 1 | 1 |    |
| arCOG00246 | C | Energy production and conversion | Mdh   | Malate/lactate dehydrogenase                                                      | COG00039 | pfam00056, pfam0286                        | cd00300        | TIGR01771            | 1 | 2 | 1 |   |   |   |   |  |  | 1 |   | 1 | 5 |    |
| arCOG02921 | C | Energy production and conversion | PetE  | Plastocyanin                                                                      | COG03794 | pfam00127                                  | cd04220        | TIGR03102            | 1 | 3 |   | 1 | 1 | 2 |   |  |  | 1 |   | 1 | 2 |    |
| arCOG01606 | C | Energy production and conversion | PorA  | Pyruvate:ferredoxin oxidoreductase or related 2-oxoacid:ferredoxin oxidoreductase | COG00674 | pfam01558, pfam0185                        | cd07034        | TIGR03710            | 1 |   |   |   | 1 |   |   |  |  | 1 |   | 1 | 1 |    |
| arCOG04101 | C | Energy production and conversion | NtpD  | Archaeal/vacuolar-type H+-ATPase subunit D                                        | COG01394 | pfam01813                                  |                | TIGR00309            | 1 |   |   |   |   |   |   |  |  | 1 |   | 1 | 1 |    |
| arCOG04949 | C | Energy production and conversion | OVPI  | Na+ or H+-translocating membrane pyrophosphatase                                  | COG03808 | pfam03030                                  |                | TIGR01104            | 1 |   |   |   |   |   |   |  |  | 1 |   | 1 | 3 |    |
| arCOG01706 | C | Energy production and conversion | AceF  | Pyruvate/2-oxoglutarate dehydrogenase complex, dihydrolipoamide acyltransferase   | COG00508 | pfam00198                                  |                | TIGR01349            | 2 | 1 | 1 | 2 |   |   |   |  |  | 1 |   | 1 | 3 |    |
| arCOG01068 | C | Energy production and conversion | Lpd   | Pyruvate/2-oxoglutarate dehydrogenase complex, dihydrolipoamide dehydrogenase     | COG01249 | pfam07992, pfam02852                       |                | TIGR01350            | 1 | 1 | 1 |   | 1 |   |   |  |  | 1 |   | 2 | 3 |    |
| arCOG02077 | C | Energy production and conversion | IscU  | NifU homolog involved in Fe-S cluster formation                                   | COG00822 | pfam01592                                  | cd06664        | TIGR03419            |   |   | 1 | 1 |   |   |   |  |  | 1 |   |   |   |    |
| arCOG04279 | C | Energy production and conversion | -     | SwiWing domain associated with predicted aconitase                                | COG01786 | pfam01989                                  | cd01356        |                      |   |   |   |   |   |   |   |  |  | 1 |   |   |   |    |
| arCOG04073 | C | Energy production and conversion | -     | Mind superfamily P-loop ATPase containing an inserted ferredoxin domain           | COG01149 | pfam01656                                  | cd03110        | TIGR01969            |   |   |   |   |   |   |   |  |  | 1 |   | 2 |   |    |
| arCOG00573 | C | Energy production and conversion | SdhA  | Succinate dehydrogenase/fumarate reductase, flavoprotein subunit                  | COG01053 | pfam00890, pfam02910                       |                | TIGR02061            |   |   |   |   |   |   |   |  |  | 1 |   |   |   |    |
| arCOG02179 | C | Energy production and conversion | NapF  | Polyferredoxin                                                                    | COG01145 | pfam12838, pfam12838, pfam12838            |                | TIGR01971, TIGR04105 |   |   |   |   |   |   |   |  |  | 1 |   |   |   |    |
| arCOG02618 | C | Energy production and conversion | -     | Ferredoxin                                                                        | COG01146 | pfam13187, pfam12139                       |                | TIGR02060            |   |   |   |   |   |   |   |  |  | 1 |   |   |   |    |
| arCOG00447 | C | Energy production and conversion | FixB  | Electron transfer flavoprotein, alpha subunit                                     | COG02025 | pfam01012, pfam0076                        | cd01985        |                      | 1 | 1 | 1 |   | 1 |   |   |  |  | 2 |   | 1 | 2 |    |
| arCOG01235 | C | Energy production and conversion | CyoA  | Heme/copper-type cytochrome/quinol oxidase, subunit 2                             | COG01622 | pfam00116                                  | cd13918        | TIGR02866            | 1 | 1 | 1 |   | 1 |   |   |  |  | 2 |   | 1 | 1 |    |
| arCOG02017 | C | Energy production and conversion | RutF  | NADH:FMN oxidoreductase RutF, flavin reductase (DIM6/NTAB) family                 | COG01853 | pfam01613                                  |                | TIGR03615            | 2 | 1 | 1 |   |   |   |   |  |  | 2 |   | 1 | 1 | 1  |
| arCOG05458 | C | Energy production and conversion | -     | Ferredoxin                                                                        | COG01146 | pfam13237                                  |                | TIGR02512            |   |   | 1 |   |   |   |   |  |  | 2 |   | 1 |   |    |
| arCOG00446 | C | Energy production and conversion | FixA  | Electron transfer flavoprotein, beta subunit                                      | COG02086 | pfam01012                                  | cd01714        |                      | 1 | 1 | 1 |   | 1 |   |   |  |  | 2 |   |   | 1 | 2  |
| arCOG04237 | C | Energy production and conversion | GltA  | Citrate synthase                                                                  | COG03372 | pfam00285                                  | cd06118        | TIGR01800            | 1 | 2 | 1 | 1 | 1 | 1 |   |  |  | 2 |   | 1 | 1 | 2  |
| arCOG01237 | C | Energy production and conversion | CyoB  | Heme/copper-type cytochrome/quinol oxidase, subunit 1 and 3                       | COG00843 | pfam00115, pfam0051                        | cd01662, cd003 | TIGR02891, TIGR      | 1 | 1 | 1 |   | 1 |   |   |  |  | 3 |   | 2 |   |    |
| arCOG00332 | C | Energy production and conversion | GlpC  | Membrane associated Fe-S oxidoreductase                                           | COG00247 | pfam02754                                  |                |                      |   |   |   |   |   |   |   |  |  | 3 |   |   | 1 | 1  |
| arCOG01252 | C | Energy production and conversion | PutA  | Lactaldehyde dehydrogenase, succinate semialdehyde dehydrogenase or other         | COG01012 | pfam00171                                  | cd07088        | TIGR01780            | 3 | 4 | 3 | 2 |   |   |   |  |  | 5 |   | 1 |   | 11 |
| arCOG00570 | C | Energy production and conversion | FixC  | Dehydrogenase (flavoprotein)                                                      | COG00644 | pfam13450                                  |                | TIGR02032            | 8 | 9 | 4 | 5 | 3 | 5 | 8 |  |  | 4 |   | 2 | 4 | 9  |
| arCOG04594 | C | Energy production and conversion | QcrB  | Cytochrome b subunit of the bc complex                                            | COG01290 |                                            |                |                      | 1 |   |   | 1 |   | 1 | 2 |  |  | 1 |   |   |   |    |
| arCOG02088 | C | Energy production and conversion | NfnB  | Nitroreductase                                                                    | COG00778 | pfam00881                                  | cd02150        | TIGR02476            |   |   | 2 |   |   |   |   |  |  | 1 |   | 1 | 1 | 2  |
| arCOG02929 | C | Energy production and conversion | PetE  | Plastocyanin                                                                      | COG03794 | pfam00127                                  | cd13921        | TIGR02657            |   |   |   |   | 1 |   |   |  |  | 1 |   |   |   |    |
| arCOG00333 | C | Energy production and conversion | GlpC  | Fe-S oxidoreductase                                                               | COG00247 | pfam13534, pfam02754                       |                |                      |   |   |   |   |   |   |   |  |  | 1 |   | 1 | 1 | 2  |
| arCOG02187 | C | Energy production and conversion | NapF  | Ferredoxin domain containing protein                                              | COG01145 | pfam12838, pfam12838                       |                | TIGR04105, TIGR04041 |   |   |   |   |   |   |   |  |  | 1 |   | 1 |   |    |
| arCOG02398 | C | Energy production and conversion | CcdA  | Cytochrome c biogenesis protein                                                   | COG00785 | pfam02683                                  |                |                      |   |   |   |   |   |   |   |  |  | 1 |   |   |   |    |
| arCOG02449 | C | Energy production and conversion | NapF  | Flavodoxin fused to ferredoxin domain                                             | COG01145 | pfam12724, pfam13187                       |                | TIGR04041            |   |   |   |   |   |   |   |  |  | 1 |   | 1 |   |    |
| arCOG01458 | C | Energy production and conversion | Qor   | NADPH:quinone reductase or related Zn-dependent oxidoreductase                    | COG00604 | pfam08240, pfam0010                        | cd08264        | TIGR02824            | 1 | 2 | 2 |   | 2 | 1 |   |  |  | 2 |   | 2 | 2 |    |
| arCOG01491 | C | Energy production and conversion | BisC  | Anaerobic dehydrogenase                                                           | COG00243 | pfam00384                                  | cd02766        | TIGR01591            |   |   |   |   |   |   |   |  |  | 3 |   | 1 | 1 | 3  |
| arCOG01500 | C | Energy production and conversion | HybA  | Fe-S cluster-containing dehydrogenase component                                   | COG00437 | pfam13459, pfam13247                       |                | TIGR02951            |   |   |   |   |   |   |   |  |  | 1 |   |   |   |    |
| arCOG00963 | C | Energy production and conversion | GlpC  | Succinate dehydrogenase/fumarate reductase, Fe-S protein subunit                  | COG00479 | pfam13085, pfam13183, pfam02754, pfam02754 |                | TIGR00384, TIGR      | 1 | 1 | 1 | 1 |   |   |   |  |  | 1 |   | 1 | 2 |    |
| arCOG01164 | C | Energy production and conversion | Icd   | Isoctate dehydrogenase                                                            | COG00538 | pfam00180                                  |                | TIGR00183            | 1 | 1 |   |   | 1 |   |   |  |  | 1 |   |   |   |    |
| arCOG04650 | C | Energy production and conversion | CyoC  | Heme/copper-type cytochrome/quinol oxidase, subunit 3                             | COG01845 | pfam00510                                  | cd00386        | TIGR02842            | 1 | 1 |   |   | 1 |   |   |  |  | 1 |   | 1 | 1 |    |
| arCOG01599 | C | Energy production and conversion | PorB  | Pyruvate:ferredoxin oxidoreductase or related 2-oxoacid:ferredoxin oxidoreductase | COG01013 | pfam02775, pfam1236                        | cd03375        | TIGR02177            | 1 | 1 |   |   |   | 1 |   |  |  | 1 |   | 1 | 1 |    |
| arCOG00701 | C | Energy production and conversion | UgpQ  | Glycerophosphoryl diester phosphodiesterase                                       | COG00584 | pfam03009                                  | cd08568        |                      | 1 | 2 | 1 | 1 | 1 | 1 | 1 |  |  | 2 |   | 1 | 1 |    |
| arCOG00340 | C | Energy production and conversion | GldD  | FAD/FMN-containing dehydrogenase fused to heterodisulfide reductase, subunit D    | COG00277 | pfam01565, pfam02913, pfam13183            |                | TIGR00387, TIGR      | 1 |   | 1 | 1 |   | 1 | 2 |  |  |   |   |   |   |    |
| arCOG00571 | C | Energy production and conversion | SdhA  | Succinate dehydrogenase/fumarate reductase, flavoprotein subunit                  | COG01053 | pfam00890, pfam02910                       |                | TIGR03378, TIGR      | 2 | 1 | 1 | 1 | 1 |   |   |  |  | 1 |   | 2 | 8 |    |
| arCOG00519 | C | Energy production and conversion | FldA  | Flavodoxin                                                                        | COG00716 | pfam12682                                  |                |                      | 3 | 2 | 3 | 1 | 1 | 4 |   |  |  |   |   |   |   |    |
| arCOG02410 | C | Energy production and conversion | -     | Coenzyme F420-dependent N5,N10-methylene tetrahydromethanopterin reductase        | COG02141 | pfam00296                                  | cd01097        | TIGR03555            |   |   | 1 |   |   |   |   |  |  |   |   |   | 2 |    |
| arCOG01359 | C | Energy production and conversion | -     | Radical SAM superfamily enzyme                                                    | COG01031 | pfam04055                                  |                | TIGR04013            |   |   |   |   |   |   |   |  |  | 1 |   | 1 | 1 |    |
| arCOG00338 | C | Energy production and conversion | SdhC  | Succinate dehydrogenase subunit C                                                 | COG02048 | pfam02754, pfam02754                       |                | TIGR03288            |   |   |   |   |   |   |   |  |  | 1 |   | 1 | 2 |    |
| arCOG03363 | C | Energy production and conversion | NtpF  | Archaeal/vacuolar-type H+-ATPase subunit H                                        | COG02811 |                                            |                |                      |   |   |   |   |   |   |   |  |  | 1 |   |   | 1 |    |
| arCOG00024 | C | Energy production and conversion | GlpK  | Glycerol kinase                                                                   | COG00554 | pfam00370, pfam0278                        | cd07786        | TIGR01311            |   |   |   |   |   |   |   |  |  | 1 |   |   |   |    |
| arCOG00335 | C | Energy production and conversion | LutB  | L-lactate utilization protein LutB, contains ferredoxin domain                    | COG01139 | pfam02589, pfam13183                       |                | TIGR00273            |   |   |   |   |   |   |   |  |  | 1 |   |   |   |    |
| arCOG00349 | C | Energy production and conversion | Fer   | Ferredoxin                                                                        | COG01141 | pfam13459                                  |                |                      |   |   |   |   |   |   |   |  |  | 1 |   |   |   |    |
| arCOG00509 | C | Energy production and conversion | NorV  | Flavobredoxin                                                                     | COG00426 | pfam00753, pfam00258                       |                |                      |   |   |   |   |   |   |   |  |  | 1 |   |   |   |    |
| arCOG00709 | C | Energy production and conversion | -     | Aldehyde:ferredoxin oxidoreductase                                                | COG02414 | pfam02730, pfam01314                       |                |                      |   |   |   |   |   |   |   |  |  | 1 |   |   |   |    |
| arCOG00853 | C | Energy production and conversion | SfcA  | Malic enzyme                                                                      | COG00281 | pfam00390, pfam0394                        | cd05311        |                      |   |   |   |   |   |   |   |  |  | 1 |   |   |   |    |
| arCOG00959 | C | Energy production and conversion | -     | Ferredoxin                                                                        | COG01146 |                                            |                | TIGR02512            |   |   |   |   |   |   |   |  |  | 1 |   |   |   |    |
| arCOG00964 | C | Energy production and conversion | HdrC  | Heterodisulfide reductase, subunit C                                              | COG01150 | pfam13183                                  |                | TIGR03290            |   |   |   |   |   |   |   |  |  | 1 |   |   |   |    |
| arCOG01097 | C | Energy production and conversion | -     | Ruberythrin                                                                       | COG01592 | pfam02915                                  | cd01041        |                      |   |   |   |   |   |   |   |  |  | 1 |   |   |   |    |
| arCOG01338 | C | Energy production and conversion | -     | Acyl-CoA synthetase, ATP-grasp containing subunit                                 | COG01042 | pfam13549                                  |                |                      |   |   |   |   |   |   |   |  |  | 1 |   |   |   |    |
| arCOG01356 | C | Energy production and conversion | -     | Radical SAM superfamily enzyme                                                    | COG01032 | pfam02310, pfam0405                        | cd02068, cd013 | TIGR02026            |   |   |   |   |   |   |   |  |  | 1 |   |   |   |    |
| arCOG01549 | C | Energy production and conversion | FrhA  | Coenzyme F420-reducing hydrogenase, alpha subunit                                 | COG03259 | pfam00374                                  |                | TIGR03295            |   |   |   |   |   |   |   |  |  | 1 |   |   |   |    |
| arCOG01552 | C | Energy production and conversion | HyC   | Ni,Fe-hydrogenase III component G                                                 | COG03262 | pfam00329                                  |                | TIGR01961            |   |   |   |   |   |   |   |  |  | 1 |   |   |   |    |
| arCOG01607 | C | Energy production and conversion | PorA  | Pyruvate:ferredoxin oxidoreductase or related 2-oxoacid:ferredoxin oxidoreductase | COG00674 | pfam01855                                  | cd07034        | TIGR03710            |   |   |   |   |   |   |   |  |  | 1 |   |   |   |    |
| arCOG01609 | C | Energy production and conversion | -     | Indolepyruvate ferredoxin oxidoreductase, alpha and beta subunit                  | COG04231 | pfam01855, pfam0277                        | cd07034, cd020 | TIGR03336            |   |   |   |   |   |   |   |  |  | 1 |   |   |   |    |
| arCOG01674 | C | Energy production and conversion | AcylP | Acylphosphatase                                                                   | COG01254 | pfam00708                                  |                |                      |   |   |   |   |   |   |   |  |  | 1 |   |   |   |    |
| arCOG01711 | C | Energy production and conversion | Ppa   | Inorganic pyrophosphatase                                                         | COG00221 | pfam00719                                  | cd00412        |                      |   |   |   |   |   |   |   |  |  | 1 |   |   |   |    |
| arCOG02146 | C | Energy production and conversion | -     | Desulfotransferase                                                                | COG02033 | pfam01880                                  | cd03172        | TIGR00332            |   |   |   |   |   |   |   |  |  | 1 |   |   |   |    |
| arCOG02428 | C | Energy production and conversion | CdhA  | CO dehydrogenase/acetyl-CoA synthase alpha subunit                                | COG01152 | pfam03063                                  | cd01916        | TIGR00314            |   |   |   |   |   |   |   |  |  | 1 |   |   |   |    |
| arCOG02461 | C | Energy production and conversion | -     | Ferredoxin                                                                        | COG01146 | pfam13237                                  | cd07030        | TIGR03224            |   |   |   |   |   |   |   |  |  | 1 |   |   |   |    |
| arCOG02472 |   |                                  |       |                                                                                   |          |                                            |                |                      |   |   |   |   |   |   |   |  |  |   |   |   |   |    |

[illegible]



|            |   |                                     |       |                                                                                |          |                                 |  |                           |                      |   |   |   |   |   |   |   |   |   |   |    |
|------------|---|-------------------------------------|-------|--------------------------------------------------------------------------------|----------|---------------------------------|--|---------------------------|----------------------|---|---|---|---|---|---|---|---|---|---|----|
| arCOG00670 | I | Lipid transport and metabolism      | PgsA  | Phosphatidylglycerophosphate synthase                                          | COG00558 | pfam01066                       |  |                           |                      | 1 | 2 | 2 | 2 | 1 |   | 2 |   | 1 | 2 | 2  |
| arCOG00239 | I | Lipid transport and metabolism      | CaID  | Enoyl-CoA hydratase/carnithine racemase                                        | COG01024 | pfam00378                       |  | cd06558                   | TIGR03210            | 3 |   | 1 | 2 |   | 1 | 3 | 1 |   | 3 | 12 |
| arCOG01707 | I | Lipid transport and metabolism      | CaIA  | Acyl-CoA dehydrogenase                                                         | COG01960 | pfam02771, pfam0277             |  | cd00567                   | TIGR03207            | 4 | 3 | 3 | 2 | 1 | 1 | 3 | 1 |   | 4 | 11 |
| arCOG04199 | I | Lipid transport and metabolism      | FAA1  | Long-chain acyl-CoA synthetase (AMP-forming)                                   | COG01022 | pfam00501                       |  | cd05907                   | TIGR01923            | 1 | 1 | 1 | 2 | 1 |   |   | 1 |   | 1 | 2  |
| arCOG01137 | I | Lipid transport and metabolism      | FadM  | Acyl-CoA thioesterase FadM                                                     | COG00824 | pfam13279                       |  | cd00586                   | TIGR00051            | 1 |   | 1 | 1 |   |   |   | 1 | 1 | 1 |    |
| arCOG04100 | I | Lipid transport and metabolism      | CaIA  | Acyl-CoA dehydrogenase                                                         | COG01960 |                                 |  |                           |                      |   |   |   |   |   |   |   | 1 |   |   |    |
| arCOG01529 | I | Lipid transport and metabolism      | Acs   | Acyl-coenzyme A synthetase/AMP-(fatty) acid ligase                             | COG00365 | pfam00501                       |  | cd05966                   | TIGR02188            | 1 | 1 |   |   |   | 1 |   | 2 |   |   |    |
| arCOG01282 | I | Lipid transport and metabolism      | PaaJ  | Acetyl-CoA acetyltransferase                                                   | COG00183 | pfam00108, pfam0280             |  | cd00751                   | TIGR01930            | 2 | 2 | 2 | 1 |   |   |   | 2 |   | 3 | 5  |
| arCOG01767 | I | Lipid transport and metabolism      | PksG  | 3-hydroxy-3-methylglutaryl-CoA synthase                                        | COG03425 | pfam08545, pfam0854             |  | cd00827                   | TIGR00748            | 1 | 1 | 1 | 1 | 1 |   |   |   | 1 | 3 | 2  |
| arCOG01278 | I | Lipid transport and metabolism      | PaaJ  | Acetyl-CoA acetyltransferase                                                   | COG00183 |                                 |  | cd00829                   | TIGR01930            | 1 | 1 | 1 | 1 |   |   |   |   | 1 | 1 |    |
| arCOG04761 | I | Lipid transport and metabolism      | UppP  | Undecaprenyl pyrophosphate phosphatase                                         | COG01968 | pfam02673                       |  |                           | TIGR00753            | 1 | 2 | 1 | 1 | 1 | 1 |   |   |   |   |    |
| arCOG01879 | I | Lipid transport and metabolism      | -     | Dolichol kinase family protein                                                 | COG00170 |                                 |  |                           |                      | 1 |   |   | 1 |   |   |   |   |   | 1 |    |
| arCOG01880 | I | Lipid transport and metabolism      | SEC59 | Dolichol kinase                                                                | COG00170 |                                 |  |                           |                      | 1 |   |   |   |   |   |   |   | 2 |   |    |
| arCOG00856 | I | Lipid transport and metabolism      | CaIC  | Acyl-CoA synthetase (AMP-forming)/AMP-acid ligase II                           | COG00318 | pfam00501                       |  | cd12119                   | TIGR01923            | 1 |   |   |   |   |   |   |   |   |   |    |
| arCOG09737 | I | Lipid transport and metabolism      | LicD  | Phosphorylcholine metabolism protein LicD                                      | COG03475 | pfam04991                       |  |                           |                      | 1 |   |   |   |   |   |   |   |   |   |    |
| arCOG04470 | I | Lipid transport and metabolism      | Psd   | Phosphatidylserine decarboxylase                                               | COG00688 | pfam02666                       |  |                           | TIGR00164            | 2 | 1 | 1 | 1 | 1 |   |   |   | 1 |   |    |
| arCOG00671 | I | Lipid transport and metabolism      | PssA  | Phosphatidylserine synthase                                                    | COG01183 | pfam01066                       |  |                           | TIGR04217            | 2 | 1 |   | 1 | 1 |   |   |   |   |   |    |
| arCOG00242 | I | Lipid transport and metabolism      | CaID  | Enoyl-CoA hydratase/carnithine racemase                                        | COG01024 | pfam00378                       |  | cd06558                   | TIGR02280            |   |   | 1 |   |   |   |   |   |   |   |    |
| arCOG01650 | I | Lipid transport and metabolism      | PldB  | Lysophospholipase, alpha-beta hydrolase superfamily                            | COG02267 | pfam12697                       |  |                           | TIGR03695            |   |   |   |   |   |   |   |   | 1 |   | 1  |
| arCOG03056 | I | Lipid transport and metabolism      | PgpB  | Membrane-associated phospholipid phosphatase                                   | COG00671 | pfam01569                       |  | cd03392                   |                      |   |   |   |   |   |   |   |   | 1 |   |    |
| arCOG07155 | I | Lipid transport and metabolism      | IsdP  | 4-diphosphocytidyl-2-methyl-D-erythritol synthase                              | COG01211 | pfam01128                       |  | cd02516                   | TIGR00453            |   |   |   |   |   |   |   |   | 1 |   |    |
| arCOG11863 | I | Lipid transport and metabolism      | -     | Membrane diacylglycerol kinase                                                 | COG00818 | pfam01219                       |  | cd14263                   |                      |   |   |   |   |   |   |   |   | 1 |   |    |
| arCOG02228 | I | Lipid transport and metabolism      | GtrA  | GtrA-like flippase                                                             | COG02246 | pfam04138                       |  |                           |                      |   |   |   |   |   |   |   |   | 2 |   |    |
| arCOG02039 | I | Lipid transport and metabolism      | ClS   | Phosphatidylserine/phosphatidylglycerophosphate/cardiolipin synthase or re     | COG01502 | pfam13091, pfam1309             |  | cd07493, cd09127, cd09128 |                      |   |   |   |   |   |   |   |   | 3 | 1 |    |
| arCOG00241 | I | Lipid transport and metabolism      | CaID  | Enoyl-CoA hydratase/carnithine racemase                                        | COG01024 | pfam00378                       |  | cd06558                   | TIGR02280            |   |   |   |   |   |   |   |   |   | 1 | 1  |
| arCOG01261 | I | Lipid transport and metabolism      | FabG  | Short-chain alcohol dehydrogenase                                              | COG01028 | pfam00106                       |  | cd05233                   | TIGR01830            |   |   |   |   |   |   |   |   | 2 | 1 |    |
| arCOG03951 | I | Lipid transport and metabolism      | PgpB  | Membrane-associated phospholipid phosphatase                                   | COG00671 | pfam01569                       |  | cd03386                   |                      |   |   |   |   |   |   |   |   | 2 | 6 |    |
| arCOG00674 | I | Lipid transport and metabolism      | PgsA  | Phosphatidylglycerophosphate synthase                                          | COG00558 | pfam01066                       |  |                           |                      |   |   |   |   |   |   |   |   |   |   | 1  |
| arCOG06122 | I | Lipid transport and metabolism      | Acs   | Acyl-coenzyme A synthetase/AMP-(fatty) acid ligase                             | COG00365 | pfam00501                       |  | cd05959                   | TIGR02262            |   |   |   |   |   |   |   |   |   |   | 1  |
| arCOG01487 | F | Nucleotide transport and metabolism | ComEB | Deoxycytidylate deaminase                                                      | COG02131 | pfam00383                       |  | cd01286                   | TIGR02571            | 1 | 1 | 1 | 1 |   |   | 1 | 1 | 1 | 1 | 1  |
| arCOG00067 | F | Nucleotide transport and metabolism | PrsA  | Phosphoribosylpyrophosphate synthetase                                         | COG00462 | pfam13793, pfam0015             |  | cd06223                   | TIGR01251            | 1 | 1 | 1 | 1 |   |   | 1 | 1 | 1 | 1 | 1  |
| arCOG03214 | F | Nucleotide transport and metabolism | ThyA  | Thymidylate synthase                                                           | COG00207 | pfam00303                       |  | cd00351                   | TIGR03283            | 1 | 1 |   | 1 | 1 |   | 1 | 1 | 1 | 1 | 4  |
| arCOG02824 | F | Nucleotide transport and metabolism | PurH  | AIICAR transformylase/IMP cyclohydrolase PurH                                  | COG00138 | pfam02142, pfam0180             |  | cd01421                   | TIGR00355            | 1 | 2 | 1 | 1 | 1 | 1 |   | 1 | 1 | 1 | 2  |
| arCOG00689 | F | Nucleotide transport and metabolism | AlIB  | Dihydroorotase or related cyclic amidohydrolase                                | COG00044 | pfam13147                       |  | cd01318                   | TIGR00857            | 1 | 2 | 1 | 1 | 1 |   | 1 | 1 | 1 | 1 | 2  |
| arCOG04276 | F | Nucleotide transport and metabolism | NrdA  | Ribonucleotide reductase, alpha subunit                                        | COG00209 | pfam03477, pfam0031             |  | cd02888                   | TIGR02504            | 1 | 2 | 2 | 1 | 1 | 1 | 1 | 1 | 2 | 1 | 3  |
| arCOG01039 | F | Nucleotide transport and metabolism | AdkA  | Archaeal adenylate kinase                                                      | COG02019 |                                 |  |                           |                      | 1 | 2 |   |   |   | 1 | 1 | 1 | 1 | 1 |    |
| arCOG04184 | F | Nucleotide transport and metabolism | RdgB  | Inosine/xanthosine triphosphate pyrophosphatase, all-alpha NTP-PPase fami      | COG00127 | pfam01725                       |  | cd00515                   | TIGR00042            | 1 |   | 1 |   |   | 1 | 1 | 1 | 1 | 1 | 4  |
| arCOG00028 | F | Nucleotide transport and metabolism | -     | Orotate phosphoribosyltransferase homolog                                      | COG00856 | pfam00156                       |  | cd06223                   | TIGR02985, TIGR      | 1 |   | 1 |   |   | 1 | 1 | 1 | 1 | 1 |    |
| arCOG00639 | F | Nucleotide transport and metabolism | PurM  | Phosphoribosylaminoimidazole (AIR) synthetase                                  | COG00150 | pfam00586, pfam0276             |  | cd02196                   | TIGR00878            | 2 | 2 | 1 | 1 | 1 | 1 | 1 | 1 | 1 | 1 | 1  |
| arCOG00029 | F | Nucleotide transport and metabolism | PyrE  | Orotate phosphoribosyltransferase                                              | COG00461 | pfam00156                       |  | cd06223                   | TIGR00336            |   | 1 | 1 | 1 |   |   | 1 | 1 | 1 | 1 | 1  |
| arCOG00692 | F | Nucleotide transport and metabolism | SsnA  | Cytosine deaminase or related metal-dependent hydrolase                        | COG00402 | pfam01979                       |  | cd01305                   | TIGR02967            |   | 1 | 1 |   |   |   | 1 | 1 | 2 |   |    |
| arCOG00419 | F | Nucleotide transport and metabolism | Hlt   | HIT family hydrolase                                                           | COG00537 | pfam01230                       |  | cd01275                   |                      |   | 1 |   |   |   | 1 | 1 | 1 | 1 | 1 | 4  |
| arCOG01747 | F | Nucleotide transport and metabolism | PurB  | Adenylosuccinate lyase                                                         | COG00015 | pfam02006, pfam1039             |  | cd01360                   | TIGR00928            |   |   | 1 |   |   |   | 1 | 1 | 1 | 1 | 2  |
| arCOG00102 | F | Nucleotide transport and metabolism | PurL  | Phosphoribosylformylglycinamide (FGAM) synthase, glutamine amidotransf         | COG00047 | pfam13507                       |  | cd01740                   | TIGR01737            | 1 | 1 |   |   |   | 1 | 1 | 2 | 1 | 1 | 2  |
| arCOG04313 | F | Nucleotide transport and metabolism | Ndk   | Nucleoside diphosphate kinase                                                  | COG00105 | pfam00334                       |  | cd04413                   |                      | 1 | 1 |   |   |   | 1 | 1 | 2 | 1 | 1 |    |
| arCOG00063 | F | Nucleotide transport and metabolism | PyrG  | CTP synthase (UTP ammonia lyase)                                               | COG00504 | pfam06418, pfam0011             |  | cd03113, cd017            | TIGR00337            | 1 | 1 | 1 | 1 | 1 | 1 | 1 | 1 | 1 | 1 | 3  |
| arCOG04462 | F | Nucleotide transport and metabolism | PurS  | Phosphoribosylformylglycinamide (FGAM) synthase, PurS component                | COG01828 | pfam02700                       |  | cd00720                   | TIGR00302            | 1 | 1 | 1 | 1 | 1 |   | 1 | 1 | 1 | 1 | 2  |
| arCOG04421 | F | Nucleotide transport and metabolism | PurC  | Phosphoribosylaminoimidazole succinocarboxamide (SAICAR) synthase              | COG00152 | pfam01259                       |  | cd01415                   | TIGR00081            | 1 | 1 | 1 | 1 | 1 |   | 1 | 1 | 1 | 1 |    |
| arCOG00641 | F | Nucleotide transport and metabolism | PurL  | Phosphoribosylformylglycinamide (FGAM) synthase, synthetase domain             | COG00046 | pfam00586, pfam0276             |  | cd02203, cd022            | TIGR01736            | 1 | 1 | 1 | 1 | 1 |   | 1 | 1 | 1 | 1 | 2  |
| arCOG01565 | F | Nucleotide transport and metabolism | NrnA  | nanoRNase/pAP phosphatase, hydrolyzes c-di-AMP and oligoRNAs                   | COG00618 | pfam01368                       |  |                           |                      | 1 | 1 | 1 | 1 | 1 |   | 1 | 1 | 1 | 1 | 1  |
| arCOG00911 | F | Nucleotide transport and metabolism | PyrB  | Aspartate carbamoyltransferase, catalytic chain                                | COG00540 | pfam02729, pfam00185            |  |                           | TIGR00670            | 1 | 2 | 1 | 1 | 1 |   | 1 | 1 | 1 | 1 | 2  |
| arCOG01034 | F | Nucleotide transport and metabolism | THEP1 | Nucleoside-triphosphate THEP1                                                  | COG01618 | pfam03266                       |  | cd00009                   |                      | 1 | 2 | 1 | 1 | 1 |   | 1 | 1 | 1 | 1 | 2  |
| arCOG04229 | F | Nucleotide transport and metabolism | PyrI  | Aspartate carbamoyltransferase, regulatory subunit                             | COG01781 | pfam01948, pfam02748            |  |                           | TIGR00240            | 1 | 2 | 1 | 1 | 1 |   | 1 | 1 | 1 | 1 | 2  |
| arCOG04048 | F | Nucleotide transport and metabolism | Dcd   | Deoxycytidine deaminase                                                        | COG00717 | pfam00692                       |  | cd07557                   | TIGR02274            | 1 |   | 1 |   |   |   | 1 | 1 | 1 | 1 | 2  |
| arCOG04387 | F | Nucleotide transport and metabolism | PurA  | Adenylosuccinate synthase                                                      | COG00104 | pfam00709                       |  | cd03108                   | TIGR00184            | 1 |   | 1 |   |   |   | 1 | 1 | 1 | 1 | 2  |
| arCOG04415 | F | Nucleotide transport and metabolism | PurD  | Phosphoribosylamine-glycine ligase                                             | COG00151 | pfam02844, pfam01071, pfam02843 |  |                           | TIGR00877            |   | 1 | 1 | 1 |   |   | 1 | 1 | 1 | 1 | 1  |
| arCOG01038 | F | Nucleotide transport and metabolism | Fap7  | Broad-specificity NMP kinase                                                   | COG01936 | pfam13238                       |  |                           |                      | 1 | 1 | 1 |   |   |   | 1 | 1 | 1 | 1 | 2  |
| arCOG00018 | F | Nucleotide transport and metabolism | Nnr2  | NAD(P)H-hydrate repair enzyme Nnr, NAD(P)H-hydrate dehydratase domain          | COG00063 | pfam03853, pfam0125             |  | cd01171                   | TIGR00197, TIGR00196 | 1 | 1 | 1 |   |   |   | 1 | 1 | 1 | 1 |    |
| arCOG00085 | F | Nucleotide transport and metabolism | GuaA  | GMP synthase, PP-ATPase domain/subunit                                         | COG00519 | pfam02540, pfam0095             |  | cd01997                   | TIGR00884            |   | 1 | 1 |   |   | 1 | 1 | 1 | 1 | 1 | 1  |
| arCOG00090 | F | Nucleotide transport and metabolism | GuaA  | GMP synthase - Glutamine amidotransferase domain                               | COG00518 | pfam00117                       |  | cd01741                   | TIGR00888            |   | 1 |   |   |   |   | 1 | 1 | 1 | 1 | 3  |
| arCOG04346 | F | Nucleotide transport and metabolism | PyrD  | 5-formaminoimidazole-4-carboxamide-1-beta-D-ribofuranosyl 5'-monophosp         | COG01759 | pfam06849, pfam06973            |  |                           | TIGR00877            |   |   |   |   |   |   | 1 |   | 2 |   |    |
| arCOG00603 | F | Nucleotide transport and metabolism | PurD  | Dihydroorotate dehydrogenase                                                   | COG00167 | pfam01180                       |  | cd04740                   | TIGR01037            | 1 | 1 | 1 | 1 | 1 | 1 | 2 | 1 | 1 | 1 | 4  |
| arCOG01037 | F | Nucleotide transport and metabolism | Cmk   | Cytidylate kinase                                                              | COG01102 | pfam13189                       |  | cd02020                   | TIGR02173            | 1 | 2 | 1 |   |   |   | 2 | 1 | 1 | 1 | 1  |
| arCOG00087 | F | Nucleotide transport and metabolism | GuaA  | GMP synthase - Glutamine amidotransferase domain                               | COG00518 | pfam00117                       |  | cd01742                   | TIGR00888            | 2 | 1 | 1 | 2 |   |   | 1 | 1 | 1 | 1 | 1  |
| arCOG01891 | F | Nucleotide transport and metabolism | Tmk   | Thymidylate kinase                                                             | COG00125 | pfam02223                       |  | cd01672                   | TIGR00041            | 2 | 1 |   | 1 |   | 1 | 2 | 1 | 1 | 1 | 2  |
| arCOG00093 | F | Nucleotide transport and metabolism | PurF  | Glutamine phosphoribosylpyrophosphate amidotransferase                         | COG00034 | pfam00310, pfam0015             |  | cd00715, cd062            | TIGR01134            | 3 | 3 | 3 |   |   | 1 | 2 | 2 | 1 | 1 | 2  |
| arCOG02825 | F | Nucleotide transport and metabolism | PurN  | Folate-dependent phosphoribosylglycinamide formyltransferase PurN              | COG00299 |                                 |  |                           |                      | 3 | 2 | 1 | 1 |   | 2 | 3 | 2 | 1 | 2 | 3  |
| arCOG02464 | F | Nucleotide transport and metabolism | PurE  | Phosphoribosylcarboxyaminoimidazole (NCAIR) mutase                             | COG00041 | pfam00731                       |  |                           | TIGR01162            | 1 | 1 |   |   |   |   | 1 | 1 | 1 | 1 |    |
| arCOG00612 | F | Nucleotide transport and metabolism | GuaB  | IMP dehydrogenase/GMP reductase                                                | COG00516 | pfam00478                       |  | cd00381                   | TIGR01302            | 2 | 2 |   | 2 |   |   | 1 | 1 | 1 | 1 | 3  |
| arCOG02807 | F | Nucleotide transport and metabolism | AzgA  | Xanthine/uracil/vitamin C permease, AzgA family                                | COG02252 | pfam00860                       |  |                           |                      |   | 1 | 1 | 1 |   |   | 1 | 1 | 1 | 1 | 2  |
| arCOG05252 | F | Nucleotide transport and metabolism | -     | Predicted secreted endonuclease distantly related to archaeal Holliday junctio | COG04741 | pfam10107                       |  |                           |                      |   |   |   |   |   |   |   | 1 | 1 |   |    |
| arCOG00030 | F | Nucleotide transport and metabolism | Apt   | Adenine/guanine phosphoribosyltransferase or related PRPP-binding protein      | COG00503 | pfam00156                       |  | cd06223                   | TIGR01090            | 1 | 1 |   | 1 |   |   | 4 |   | 1 | 1 | 4  |
| arCOG00081 | F | Nucleotide transport and metabolism | PyrF  | Orotidine-5'-phosphate decarboxylase                                           | COG00284 | pfam00215                       |  | cd04725                   | TIGR01740            | 1 | 2 |   |   |   |   |   | 1 | 1 | 1 | 2  |
| arCOG03575 | F | Nucleotide transport and metabolism | -     | Polyposphatase kinase 2                                                        | COG02326 | pfam03976, pfam0397             |  |                           | TIGR03708            |   |   |   | 1 |   |   |   |   |   |   |    |
| arCOG00858 | F | Nucleotide transport and metabolism | PyrH  | Uridylate kinase                                                               | COG00528 | pfam00696                       |  | cd04253                   | TIGR02076            |   |   |   |   |   |   |   | 1 | 1 | 1 | 1  |
| arCOG04541 | F | Nucleotide transport and metabolism | MIS1  | Formyltetrahydrofolate synthetase                                              | COG02759 | pfam01268                       |  | cd00477                   |                      |   |   |   |   |   |   |   | 1 | 1 | 1 | 2  |
| arCOG01350 |   |                                     |       |                                                                                |          |                                 |  |                           |                      |   |   |   |   |   |   |   |   |   |   |    |

[illegible]

|            |   |                  |       |                                                                            |          |                                            |                |           |   |   |   |   |   |   |   |   |   |   |   |   |
|------------|---|------------------|-------|----------------------------------------------------------------------------|----------|--------------------------------------------|----------------|-----------|---|---|---|---|---|---|---|---|---|---|---|---|
| arCOG05351 | S | Function unknown | -     | Uncharacterized membrane protein                                           |          | pfam11433                                  |                |           |   |   | 2 |   |   |   |   | 2 |   | 1 |   |   |
| arCOG01907 | S | Function unknown | AIM24 | Uncharacterized protein, AIM24 family                                      | COG02013 | pfam01987                                  |                | TIGR00266 | 3 | 3 | 3 | 3 |   |   | 3 | 3 |   | 1 |   | 1 |
| arCOG03232 | S | Function unknown | -     | VanZ like family protein                                                   | COG05652 | pfam04892                                  |                |           | 1 | 1 |   | 1 |   |   |   |   |   | 1 |   | 1 |
| arCOG07442 | S | Function unknown | -     | Uncharacterized protein                                                    |          |                                            |                |           | 1 | 1 |   |   |   |   |   |   |   | 1 |   |   |
| arCOG02087 | S | Function unknown | -     | Predicted membrane protein                                                 | COG01470 | pfam10633, pfam13620, pfam10633            |                |           | 1 | 2 |   | 1 |   |   | 1 |   |   |   |   | 2 |
| arCOG04214 | S | Function unknown | -     | Uncharacterized protein                                                    | COG00432 | pfam01894                                  |                | TIGR00149 | 1 |   | 1 |   |   | 1 |   |   |   | 1 | 1 | 1 |
| arCOG10338 | S | Function unknown | -     | Uncharacterized protein                                                    | SC.00914 | pfam13517, pfam13517, pfam13517, pfam13517 |                |           |   | 2 |   | 1 |   | 1 |   |   |   | 1 | 1 | 1 |
| arCOG05338 | S | Function unknown | -     | Uncharacterized protein                                                    |          |                                            |                |           |   |   | 1 |   | 1 |   |   |   |   | 1 |   |   |
| arCOG02081 | S | Function unknown | -     | Predicted membrane protein                                                 | COG01470 | pfam10633                                  |                |           |   |   |   | 1 |   |   |   |   |   | 1 | 2 | 2 |
| arCOG02206 | S | Function unknown | -     | Uncharacterized membrane protein                                           |          |                                            |                |           |   |   |   |   |   | 1 |   |   |   | 1 | 1 | 1 |
| arCOG01330 | S | Function unknown | -     | Uncharacterized membrane protein                                           | COG02426 | pfam06695                                  |                |           |   |   |   |   |   |   |   |   |   | 1 | 2 | 1 |
| arCOG04269 | S | Function unknown | -     | Protein, predicted to be involved in DNA repair                            | COG01602 | pfam04894, pfam04895                       |                |           |   |   |   |   |   |   |   |   |   | 1 | 2 | 3 |
| arCOG02565 | S | Function unknown | -     | Secreted uncharacterized protein                                           | COG05276 |                                            |                |           |   |   |   |   |   |   |   |   |   | 1 |   |   |
| arCOG06429 | S | Function unknown | -     | Uncharacterized protein, contains NRDE domain                              | COG03332 | pfam05742                                  |                |           |   |   |   |   |   |   |   |   |   | 1 |   |   |
| arCOG02508 | S | Function unknown | -     | Secreted protein, with PKD repeat domain                                   | COG03291 | pfam00801, pfam00800                       | cd00146, cd001 | TIGR00864 | 1 | 1 | 2 |   |   | 1 |   |   |   |   |   | 3 |
| arCOG02884 | S | Function unknown | -     | Membrane associated protein with extracellular Ig-like domain, a component | COG04743 |                                            |                |           | 1 | 1 | 1 | 1 |   | 1 |   |   | 2 |   |   |   |
| arCOG04618 | S | Function unknown | -     | Uncharacterized protein, DUF2237 family                                    | COG03651 | pfam09996                                  |                |           | 1 | 1 |   | 1 | 1 | 1 |   |   |   | 1 |   | 2 |
| arCOG10444 | S | Function unknown | -     | Uncharacterized protein                                                    |          |                                            |                |           | 1 | 1 |   | 1 |   |   |   |   |   |   |   | 4 |
| arCOG12677 | S | Function unknown | -     | Uncharacterized protein                                                    |          |                                            |                |           | 1 | 1 |   |   | 1 | 1 |   |   |   |   |   |   |
| arCOG04693 | S | Function unknown | -     | Uncharacterized protein                                                    |          |                                            |                |           | 1 | 1 |   |   |   |   |   |   |   |   |   | 1 |
| arCOG03888 | S | Function unknown | -     | Uncharacterized membrane protein                                           |          |                                            |                |           | 1 | 1 |   |   |   |   |   |   |   |   |   |   |
| arCOG03949 | S | Function unknown | -     | Uncharacterized membrane protein                                           | COG03815 | pfam09858                                  |                |           | 1 | 2 | 1 | 1 | 1 | 1 |   |   |   | 1 |   | 2 |
| arCOG07680 | S | Function unknown | -     | Uncharacterized membrane protein                                           | COG02832 | pfam04304                                  |                |           | 1 | 2 | 1 |   |   | 1 |   |   |   |   | 1 | 3 |
| arCOG10153 | S | Function unknown | -     | Uncharacterized membrane protein, DUF4112 family                           |          | pfam13430                                  |                |           | 1 | 2 |   | 1 |   |   |   |   |   |   |   |   |
| arCOG04364 | S | Function unknown | -     | Uncharacterized protein                                                    | COG01772 | pfam04407                                  |                |           | 1 | 3 | 1 | 1 | 1 | 2 |   |   |   |   |   |   |
| arCOG02491 | S | Function unknown | -     | WD40 repeats containing protein                                            | COG02319 | pfam13360                                  |                |           | 1 |   | 1 | 1 | 2 |   |   |   |   | 1 |   |   |
| arCOG01119 | S | Function unknown | -     | GVD domain, alpha/beta barrel superfamily                                  | COG04274 | pfam08734                                  |                |           | 1 |   | 1 | 1 |   |   |   |   |   |   |   |   |
| arCOG08355 | S | Function unknown | -     | Uncharacterized membrane protein                                           |          |                                            |                |           | 1 |   | 1 |   | 1 | 1 |   |   |   |   |   |   |
| arCOG04566 | S | Function unknown | -     | Uncharacterized protein                                                    |          |                                            |                |           | 1 |   |   | 1 |   |   |   |   |   |   |   |   |
| arCOG02966 | S | Function unknown | -     | HEAT repeats containing protein                                            | COG01413 |                                            |                |           | 1 |   |   |   | 1 | 1 |   |   |   |   |   |   |
| arCOG03749 | S | Function unknown | -     | Uncharacterized membrane protein                                           | COG04243 | pfam07884                                  | cd12918        |           | 1 |   |   |   | 1 |   |   |   |   |   |   |   |
| arCOG06533 | S | Function unknown | -     | Uncharacterized membrane protein                                           |          |                                            |                |           |   |   |   |   |   |   |   |   |   |   |   |   |

[illegible]

[illegible]

|           |   |                                  |   |                                                                                |          |                      |                  |                                                                                                                                                                                                                                                                                                                                                                                                                                                                                                                                                                                                                                                                                                                                                                                                                                                                                                                                                                                                                                                                                                                                                                                                                                                                                                                                                                                                                                                                                                                                                                                                                                                                                                                                                                                                                                                                                                                                                                                                                                                                                                                                                                                                                                                                                                                                                                                                                                                                                                                                                                                                                                                                                                                                                                                                                                                                                                                                                                                                                                                                                                                                                                                                                                                                                                                                                                                                                                                                                                                                                                                                                                                                                                                                                                                                                                                                                                                                                                                                                                                                                                                                                                                                                                                                                                                                                                                                                                                                                                                                                                                                                                                   |  |   |   |   |   |   |   |   |   |   |   |   |   |    |   |
|-----------|---|----------------------------------|---|--------------------------------------------------------------------------------|----------|----------------------|------------------|---------------------------------------------------------------------------------------------------------------------------------------------------------------------------------------------------------------------------------------------------------------------------------------------------------------------------------------------------------------------------------------------------------------------------------------------------------------------------------------------------------------------------------------------------------------------------------------------------------------------------------------------------------------------------------------------------------------------------------------------------------------------------------------------------------------------------------------------------------------------------------------------------------------------------------------------------------------------------------------------------------------------------------------------------------------------------------------------------------------------------------------------------------------------------------------------------------------------------------------------------------------------------------------------------------------------------------------------------------------------------------------------------------------------------------------------------------------------------------------------------------------------------------------------------------------------------------------------------------------------------------------------------------------------------------------------------------------------------------------------------------------------------------------------------------------------------------------------------------------------------------------------------------------------------------------------------------------------------------------------------------------------------------------------------------------------------------------------------------------------------------------------------------------------------------------------------------------------------------------------------------------------------------------------------------------------------------------------------------------------------------------------------------------------------------------------------------------------------------------------------------------------------------------------------------------------------------------------------------------------------------------------------------------------------------------------------------------------------------------------------------------------------------------------------------------------------------------------------------------------------------------------------------------------------------------------------------------------------------------------------------------------------------------------------------------------------------------------------------------------------------------------------------------------------------------------------------------------------------------------------------------------------------------------------------------------------------------------------------------------------------------------------------------------------------------------------------------------------------------------------------------------------------------------------------------------------------------------------------------------------------------------------------------------------------------------------------------------------------------------------------------------------------------------------------------------------------------------------------------------------------------------------------------------------------------------------------------------------------------------------------------------------------------------------------------------------------------------------------------------------------------------------------------------------------------------------------------------------------------------------------------------------------------------------------------------------------------------------------------------------------------------------------------------------------------------------------------------------------------------------------------------------------------------------------------------------------------------------------------------------------------------------|--|---|---|---|---|---|---|---|---|---|---|---|---|----|---|
| arCG00893 | R | General function prediction only | - | Predicted metal-dependent hydrolase (urease superfamily)                       | COG01831 | pfam01026            |                  |                                                                                                                                                                                                                                                                                                                                                                                                                                                                                                                                                                                                                                                                                                                                                                                                                                                                                                                                                                                                                                                                                                                                                                                                                                                                                                                                                                                                                                                                                                                                                                                                                                                                                                                                                                                                                                                                                                                                                                                                                                                                                                                                                                                                                                                                                                                                                                                                                                                                                                                                                                                                                                                                                                                                                                                                                                                                                                                                                                                                                                                                                                                                                                                                                                                                                                                                                                                                                                                                                                                                                                                                                                                                                                                                                                                                                                                                                                                                                                                                                                                                                                                                                                                                                                                                                                                                                                                                                                                                                                                                                                                                                                                   |  | 1 | 1 |   |   |   |   |   | 1 |   |   |   | 1 | 1  | 2 |
| arCG00543 | R | General function prediction only | - | Predicted metal-dependent RNase, consists of a metallo-beta-lactamase domain   | COG01782 | pfam00753, pfam1099  | cd02410          | TIGR03675                                                                                                                                                                                                                                                                                                                                                                                                                                                                                                                                                                                                                                                                                                                                                                                                                                                                                                                                                                                                                                                                                                                                                                                                                                                                                                                                                                                                                                                                                                                                                                                                                                                                                                                                                                                                                                                                                                                                                                                                                                                                                                                                                                                                                                                                                                                                                                                                                                                                                                                                                                                                                                                                                                                                                                                                                                                                                                                                                                                                                                                                                                                                                                                                                                                                                                                                                                                                                                                                                                                                                                                                                                                                                                                                                                                                                                                                                                                                                                                                                                                                                                                                                                                                                                                                                                                                                                                                                                                                                                                                                                                                                                         |  | 1 |   | 1 | 1 | 1 | 1 | 1 |   | 1 |   |   |   | 1  | 5 |
| arCG01093 | R | General function prediction only | - | Protein distantly related to bacterial ferritins                               | COG02406 | pfam00210            | cd01052          |                                                                                                                                                                                                                                                                                                                                                                                                                                                                                                                                                                                                                                                                                                                                                                                                                                                                                                                                                                                                                                                                                                                                                                                                                                                                                                                                                                                                                                                                                                                                                                                                                                                                                                                                                                                                                                                                                                                                                                                                                                                                                                                                                                                                                                                                                                                                                                                                                                                                                                                                                                                                                                                                                                                                                                                                                                                                                                                                                                                                                                                                                                                                                                                                                                                                                                                                                                                                                                                                                                                                                                                                                                                                                                                                                                                                                                                                                                                                                                                                                                                                                                                                                                                                                                                                                                                                                                                                                                                                                                                                                                                                                                                   |  | 1 |   |   | 1 |   |   |   | 1 |   |   |   |   |    |   |
| arCG00347 | R | General function prediction only | - | Archaeal enzyme of ATP-grasp superfamily                                       | COG01938 | pfam09754            |                  | TIGR00161                                                                                                                                                                                                                                                                                                                                                                                                                                                                                                                                                                                                                                                                                                                                                                                                                                                                                                                                                                                                                                                                                                                                                                                                                                                                                                                                                                                                                                                                                                                                                                                                                                                                                                                                                                                                                                                                                                                                                                                                                                                                                                                                                                                                                                                                                                                                                                                                                                                                                                                                                                                                                                                                                                                                                                                                                                                                                                                                                                                                                                                                                                                                                                                                                                                                                                                                                                                                                                                                                                                                                                                                                                                                                                                                                                                                                                                                                                                                                                                                                                                                                                                                                                                                                                                                                                                                                                                                                                                                                                                                                                                                                                         |  | 2 |   | 1 | 1 | 1 | 1 | 1 |   | 1 |   | 2 |   | 1  |   |
| arCG04628 | R | General function prediction only | - | Predicted metal-dependent hydrolase                                            | COG01547 | pfam03745            |                  |                                                                                                                                                                                                                                                                                                                                                                                                                                                                                                                                                                                                                                                                                                                                                                                                                                                                                                                                                                                                                                                                                                                                                                                                                                                                                                                                                                                                                                                                                                                                                                                                                                                                                                                                                                                                                                                                                                                                                                                                                                                                                                                                                                                                                                                                                                                                                                                                                                                                                                                                                                                                                                                                                                                                                                                                                                                                                                                                                                                                                                                                                                                                                                                                                                                                                                                                                                                                                                                                                                                                                                                                                                                                                                                                                                                                                                                                                                                                                                                                                                                                                                                                                                                                                                                                                                                                                                                                                                                                                                                                                                                                                                                   |  |   | 1 | 1 | 1 |   |   |   | 1 |   |   |   |   |    |   |
| arCG02579 | R | General function prediction only | - | Fe-S cluster containing protein                                                | COG00727 |                      |                  |                                                                                                                                                                                                                                                                                                                                                                                                                                                                                                                                                                                                                                                                                                                                                                                                                                                                                                                                                                                                                                                                                                                                                                                                                                                                                                                                                                                                                                                                                                                                                                                                                                                                                                                                                                                                                                                                                                                                                                                                                                                                                                                                                                                                                                                                                                                                                                                                                                                                                                                                                                                                                                                                                                                                                                                                                                                                                                                                                                                                                                                                                                                                                                                                                                                                                                                                                                                                                                                                                                                                                                                                                                                                                                                                                                                                                                                                                                                                                                                                                                                                                                                                                                                                                                                                                                                                                                                                                                                                                                                                                                                                                                                   |  |   | 1 |   |   |   |   |   | 1 |   |   | 2 |   | 1  |   |
| arCG03096 | R | General function prediction only | - | NAD dependent epimerase/dehydratase family enzyme                              | COG01090 | pfam01370, pfam0833  | cd05242          | TIGR01777                                                                                                                                                                                                                                                                                                                                                                                                                                                                                                                                                                                                                                                                                                                                                                                                                                                                                                                                                                                                                                                                                                                                                                                                                                                                                                                                                                                                                                                                                                                                                                                                                                                                                                                                                                                                                                                                                                                                                                                                                                                                                                                                                                                                                                                                                                                                                                                                                                                                                                                                                                                                                                                                                                                                                                                                                                                                                                                                                                                                                                                                                                                                                                                                                                                                                                                                                                                                                                                                                                                                                                                                                                                                                                                                                                                                                                                                                                                                                                                                                                                                                                                                                                                                                                                                                                                                                                                                                                                                                                                                                                                                                                         |  |   | 2 |   |   |   | 1 | 1 |   |   |   | 1 |   | 3  |   |
| arCG03991 | R | General function prediction only | - | PKD repeats containing protein                                                 | COG03291 | pfam00801            | cd00146          | TIGR00864, TIGR04213                                                                                                                                                                                                                                                                                                                                                                                                                                                                                                                                                                                                                                                                                                                                                                                                                                                                                                                                                                                                                                                                                                                                                                                                                                                                                                                                                                                                                                                                                                                                                                                                                                                                                                                                                                                                                                                                                                                                                                                                                                                                                                                                                                                                                                                                                                                                                                                                                                                                                                                                                                                                                                                                                                                                                                                                                                                                                                                                                                                                                                                                                                                                                                                                                                                                                                                                                                                                                                                                                                                                                                                                                                                                                                                                                                                                                                                                                                                                                                                                                                                                                                                                                                                                                                                                                                                                                                                                                                                                                                                                                                                                                              |  |   |   |   |   | 1 |   |   | 1 |   |   | 1 |   | 2  |   |
| arCG04212 | R | General function prediction only | - | Predicted DNA-binding protein with PD1-like DNA-binding motif                  | COG01661 | pfam03479            | cd11378          |                                                                                                                                                                                                                                                                                                                                                                                                                                                                                                                                                                                                                                                                                                                                                                                                                                                                                                                                                                                                                                                                                                                                                                                                                                                                                                                                                                                                                                                                                                                                                                                                                                                                                                                                                                                                                                                                                                                                                                                                                                                                                                                                                                                                                                                                                                                                                                                                                                                                                                                                                                                                                                                                                                                                                                                                                                                                                                                                                                                                                                                                                                                                                                                                                                                                                                                                                                                                                                                                                                                                                                                                                                                                                                                                                                                                                                                                                                                                                                                                                                                                                                                                                                                                                                                                                                                                                                                                                                                                                                                                                                                                                                                   |  |   |   |   |   |   |   |   |   |   | 1 |   | 1 | 1  |   |
| arCG06747 | R | General function prediction only | - | SRP2 superfamily protein                                                       | COG00846 | pfam02146, pfam1328  | cd01406          |                                                                                                                                                                                                                                                                                                                                                                                                                                                                                                                                                                                                                                                                                                                                                                                                                                                                                                                                                                                                                                                                                                                                                                                                                                                                                                                                                                                                                                                                                                                                                                                                                                                                                                                                                                                                                                                                                                                                                                                                                                                                                                                                                                                                                                                                                                                                                                                                                                                                                                                                                                                                                                                                                                                                                                                                                                                                                                                                                                                                                                                                                                                                                                                                                                                                                                                                                                                                                                                                                                                                                                                                                                                                                                                                                                                                                                                                                                                                                                                                                                                                                                                                                                                                                                                                                                                                                                                                                                                                                                                                                                                                                                                   |  |   |   |   |   |   |   |   | 1 |   |   |   |   |    |   |
| arCG06769 | R | General function prediction only | - | GTPase SAR1 family domain fused to Leucine-rich repeats domain                 | COG01100 | pfam13855, pfam1385  | cd00116, cd099   | TIGR00231                                                                                                                                                                                                                                                                                                                                                                                                                                                                                                                                                                                                                                                                                                                                                                                                                                                                                                                                                                                                                                                                                                                                                                                                                                                                                                                                                                                                                                                                                                                                                                                                                                                                                                                                                                                                                                                                                                                                                                                                                                                                                                                                                                                                                                                                                                                                                                                                                                                                                                                                                                                                                                                                                                                                                                                                                                                                                                                                                                                                                                                                                                                                                                                                                                                                                                                                                                                                                                                                                                                                                                                                                                                                                                                                                                                                                                                                                                                                                                                                                                                                                                                                                                                                                                                                                                                                                                                                                                                                                                                                                                                                                                         |  |   |   |   |   |   |   |   | 1 |   |   |   |   |    |   |
| arCG00499 | R | General function prediction only | - | Metal-dependent hydrolase of the beta-lactamase superfamily                    | COG01235 | pfam12706            |                  | TIGR02651                                                                                                                                                                                                                                                                                                                                                                                                                                                                                                                                                                                                                                                                                                                                                                                                                                                                                                                                                                                                                                                                                                                                                                                                                                                                                                                                                                                                                                                                                                                                                                                                                                                                                                                                                                                                                                                                                                                                                                                                                                                                                                                                                                                                                                                                                                                                                                                                                                                                                                                                                                                                                                                                                                                                                                                                                                                                                                                                                                                                                                                                                                                                                                                                                                                                                                                                                                                                                                                                                                                                                                                                                                                                                                                                                                                                                                                                                                                                                                                                                                                                                                                                                                                                                                                                                                                                                                                                                                                                                                                                                                                                                                         |  | 1 | 1 | 1 | 1 | 1 | 1 | 1 | 2 |   | 1 |   | 1 | 1  |   |
| arCG01225 | R | General function prediction only | - | GTPase SAR1 or related small G protein                                         | COG01100 | pfam03029            | cd02027, cd00880 |                                                                                                                                                                                                                                                                                                                                                                                                                                                                                                                                                                                                                                                                                                                                                                                                                                                                                                                                                                                                                                                                                                                                                                                                                                                                                                                                                                                                                                                                                                                                                                                                                                                                                                                                                                                                                                                                                                                                                                                                                                                                                                                                                                                                                                                                                                                                                                                                                                                                                                                                                                                                                                                                                                                                                                                                                                                                                                                                                                                                                                                                                                                                                                                                                                                                                                                                                                                                                                                                                                                                                                                                                                                                                                                                                                                                                                                                                                                                                                                                                                                                                                                                                                                                                                                                                                                                                                                                                                                                                                                                                                                                                                                   |  | 1 | 1 | 1 | 1 | 1 | 1 | 1 | 2 |   | 1 |   | 1 |    |   |
| arCG04444 | R | General function prediction only | - | ACT domain containing protein                                                  | COG04747 | pfam01842, pfam0184  | cd04908, cd04908 |                                                                                                                                                                                                                                                                                                                                                                                                                                                                                                                                                                                                                                                                                                                                                                                                                                                                                                                                                                                                                                                                                                                                                                                                                                                                                                                                                                                                                                                                                                                                                                                                                                                                                                                                                                                                                                                                                                                                                                                                                                                                                                                                                                                                                                                                                                                                                                                                                                                                                                                                                                                                                                                                                                                                                                                                                                                                                                                                                                                                                                                                                                                                                                                                                                                                                                                                                                                                                                                                                                                                                                                                                                                                                                                                                                                                                                                                                                                                                                                                                                                                                                                                                                                                                                                                                                                                                                                                                                                                                                                                                                                                                                                   |  | 1 | 1 | 1 | 1 | 1 | 1 | 2 |   |   | 1 |   |   | 2  |   |
| arCG00062 | R | General function prediction only | - | Predicted amidohydrolase                                                       | COG00388 | pfam00795            | cd07197          | TIGR03381                                                                                                                                                                                                                                                                                                                                                                                                                                                                                                                                                                                                                                                                                                                                                                                                                                                                                                                                                                                                                                                                                                                                                                                                                                                                                                                                                                                                                                                                                                                                                                                                                                                                                                                                                                                                                                                                                                                                                                                                                                                                                                                                                                                                                                                                                                                                                                                                                                                                                                                                                                                                                                                                                                                                                                                                                                                                                                                                                                                                                                                                                                                                                                                                                                                                                                                                                                                                                                                                                                                                                                                                                                                                                                                                                                                                                                                                                                                                                                                                                                                                                                                                                                                                                                                                                                                                                                                                                                                                                                                                                                                                                                         |  | 1 | 2 | 1 | 1 | 1 | 1 | 2 |   |   | 1 |   | 2 |    |   |
| arCG02293 | R | General function prediction only | - | HAD superfamily hydrolase                                                      | COG00637 | pfam13419            | cd01427          | TIGR02009                                                                                                                                                                                                                                                                                                                                                                                                                                                                                                                                                                                                                                                                                                                                                                                                                                                                                                                                                                                                                                                                                                                                                                                                                                                                                                                                                                                                                                                                                                                                                                                                                                                                                                                                                                                                                                                                                                                                                                                                                                                                                                                                                                                                                                                                                                                                                                                                                                                                                                                                                                                                                                                                                                                                                                                                                                                                                                                                                                                                                                                                                                                                                                                                                                                                                                                                                                                                                                                                                                                                                                                                                                                                                                                                                                                                                                                                                                                                                                                                                                                                                                                                                                                                                                                                                                                                                                                                                                                                                                                                                                                                                                         |  | 2 | 3 | 1 | 2 | 1 | 2 | 2 |   |   | 1 |   | 2 |    |   |
| arCG02742 | R | General function prediction only | - | Uncharacterized membrane anchored protein with extracellular vWF domain        | COG01721 | pfam01882            |                  |                                                                                                                                                                                                                                                                                                                                                                                                                                                                                                                                                                                                                                                                                                                                                                                                                                                                                                                                                                                                                                                                                                                                                                                                                                                                                                                                                                                                                                                                                                                                                                                                                                                                                                                                                                                                                                                                                                                                                                                                                                                                                                                                                                                                                                                                                                                                                                                                                                                                                                                                                                                                                                                                                                                                                                                                                                                                                                                                                                                                                                                                                                                                                                                                                                                                                                                                                                                                                                                                                                                                                                                                                                                                                                                                                                                                                                                                                                                                                                                                                                                                                                                                                                                                                                                                                                                                                                                                                                                                                                                                                                                                                                                   |  | 2 | 1 | 1 | 2 |   |   | 2 |   |   | 2 |   | 2 |    | 4 |
| arCG04303 | R | General function prediction only | - | Uncharacterized Rossmann fold enzyme                                           | COG01634 | pfam01973            | cd07995          |                                                                                                                                                                                                                                                                                                                                                                                                                                                                                                                                                                                                                                                                                                                                                                                                                                                                                                                                                                                                                                                                                                                                                                                                                                                                                                                                                                                                                                                                                                                                                                                                                                                                                                                                                                                                                                                                                                                                                                                                                                                                                                                                                                                                                                                                                                                                                                                                                                                                                                                                                                                                                                                                                                                                                                                                                                                                                                                                                                                                                                                                                                                                                                                                                                                                                                                                                                                                                                                                                                                                                                                                                                                                                                                                                                                                                                                                                                                                                                                                                                                                                                                                                                                                                                                                                                                                                                                                                                                                                                                                                                                                                                                   |  | 1 | 1 | 1 |   | 1 |   | 2 |   |   | 1 |   | 1 | 1  |   |
| arCG03450 | R | General function prediction only | - | Predicted surface protease of transglutaminase family                          |          |                      |                  |                                                                                                                                                                                                                                                                                                                                                                                                                                                                                                                                                                                                                                                                                                                                                                                                                                                                                                                                                                                                                                                                                                                                                                                                                                                                                                                                                                                                                                                                                                                                                                                                                                                                                                                                                                                                                                                                                                                                                                                                                                                                                                                                                                                                                                                                                                                                                                                                                                                                                                                                                                                                                                                                                                                                                                                                                                                                                                                                                                                                                                                                                                                                                                                                                                                                                                                                                                                                                                                                                                                                                                                                                                                                                                                                                                                                                                                                                                                                                                                                                                                                                                                                                                                                                                                                                                                                                                                                                                                                                                                                                                                                                                                   |  | 1 | 2 | 1 | 1 |   | 1 | 2 |   |   | 1 |   |   | 3  |   |
| arCG04466 | R | General function prediction only | - | Na+-dependent transporter of the SMF family                                    | COG00733 | pfam00209            | cd10336          |                                                                                                                                                                                                                                                                                                                                                                                                                                                                                                                                                                                                                                                                                                                                                                                                                                                                                                                                                                                                                                                                                                                                                                                                                                                                                                                                                                                                                                                                                                                                                                                                                                                                                                                                                                                                                                                                                                                                                                                                                                                                                                                                                                                                                                                                                                                                                                                                                                                                                                                                                                                                                                                                                                                                                                                                                                                                                                                                                                                                                                                                                                                                                                                                                                                                                                                                                                                                                                                                                                                                                                                                                                                                                                                                                                                                                                                                                                                                                                                                                                                                                                                                                                                                                                                                                                                                                                                                                                                                                                                                                                                                                                                   |  |   |   |   |   |   |   |   | 1 |   |   |   |   |    |   |
| arCG04950 | R | General function prediction only | - | Uncharacterized pyridoxal phosphate-containing protein, affects ltv metabolism | COG00325 | pfam01168            | cd00635          | TIGR00044                                                                                                                                                                                                                                                                                                                                                                                                                                                                                                                                                                                                                                                                                                                                                                                                                                                                                                                                                                                                                                                                                                                                                                                                                                                                                                                                                                                                                                                                                                                                                                                                                                                                                                                                                                                                                                                                                                                                                                                                                                                                                                                                                                                                                                                                                                                                                                                                                                                                                                                                                                                                                                                                                                                                                                                                                                                                                                                                                                                                                                                                                                                                                                                                                                                                                                                                                                                                                                                                                                                                                                                                                                                                                                                                                                                                                                                                                                                                                                                                                                                                                                                                                                                                                                                                                                                                                                                                                                                                                                                                                                                                                                         |  | 1 |   |   |   |   |   | 2 |   |   | 1 |   |   |    |   |
| arCG04624 | R | General function prediction only | - | Multimeric flavodoxin WrbA                                                     | COG00431 |                      |                  |                                                                                                                                                                                                                                                                                                                                                                                                                                                                                                                                                                                                                                                                                                                                                                                                                                                                                                                                                                                                                                                                                                                                                                                                                                                                                                                                                                                                                                                                                                                                                                                                                                                                                                                                                                                                                                                                                                                                                                                                                                                                                                                                                                                                                                                                                                                                                                                                                                                                                                                                                                                                                                                                                                                                                                                                                                                                                                                                                                                                                                                                                                                                                                                                                                                                                                                                                                                                                                                                                                                                                                                                                                                                                                                                                                                                                                                                                                                                                                                                                                                                                                                                                                                                                                                                                                                                                                                                                                                                                                                                                                                                                                                   |  | 1 |   |   |   |   |   |   | 2 |   |   |   | 1 | 1  |   |
| arCG02155 | R | General function prediction only | - | Protein implicated in RNA metabolism, contains PRC-barrel domain               | COG01873 | pfam05239            |                  |                                                                                                                                                                                                                                                                                                                                                                                                                                                                                                                                                                                                                                                                                                                                                                                                                                                                                                                                                                                                                                                                                                                                                                                                                                                                                                                                                                                                                                                                                                                                                                                                                                                                                                                                                                                                                                                                                                                                                                                                                                                                                                                                                                                                                                                                                                                                                                                                                                                                                                                                                                                                                                                                                                                                                                                                                                                                                                                                                                                                                                                                                                                                                                                                                                                                                                                                                                                                                                                                                                                                                                                                                                                                                                                                                                                                                                                                                                                                                                                                                                                                                                                                                                                                                                                                                                                                                                                                                                                                                                                                                                                                                                                   |  | 1 | 1 | 1 | 1 | 1 | 1 | 1 | 4 |   | 1 |   | 2 | 1  | 2 |
| arCG03682 | R | General function prediction only | - | Membrane associated serine/threonine protein kinase                            | COG00515 | pfam00069            | cd14014          |                                                                                                                                                                                                                                                                                                                                                                                                                                                                                                                                                                                                                                                                                                                                                                                                                                                                                                                                                                                                                                                                                                                                                                                                                                                                                                                                                                                                                                                                                                                                                                                                                                                                                                                                                                                                                                                                                                                                                                                                                                                                                                                                                                                                                                                                                                                                                                                                                                                                                                                                                                                                                                                                                                                                                                                                                                                                                                                                                                                                                                                                                                                                                                                                                                                                                                                                                                                                                                                                                                                                                                                                                                                                                                                                                                                                                                                                                                                                                                                                                                                                                                                                                                                                                                                                                                                                                                                                                                                                                                                                                                                                                                                   |  | 2 | 3 | 2 | 1 | 2 | 4 | 5 |   |   | 2 |   |   |    |   |
| arCG02174 | R | General function prediction only | - | Predicted exporter of the RND superfamily                                      | COG01033 | pfam03176, pfam03176 |                  | TIGR00921                                                                                                                                                                                                                                                                                                                                                                                                                                                                                                                                                                                                                                                                                                                                                                                                                                                                                                                                                                                                                                                                                                                                                                                                                                                                                                                                                                                                                                                                                                                                                                                                                                                                                                                                                                                                                                                                                                                                                                                                                                                                                                                                                                                                                                                                                                                                                                                                                                                                                                                                                                                                                                                                                                                                                                                                                                                                                                                                                                                                                                                                                                                                                                                                                                                                                                                                                                                                                                                                                                                                                                                                                                                                                                                                                                                                                                                                                                                                                                                                                                                                                                                                                                                                                                                                                                                                                                                                                                                                                                                                                                                                                                         |  | 4 | 4 | 4 | 3 |   | 3 | 5 |   |   | 1 |   | 6 | 11 |   |
| arCG01848 | R | General function prediction only | - | Acetyltransferase (isoleucine patch superfamily)                               | COG00110 | pfam00132, pfam0013  | cd03358          | TIGR03570                                                                                                                                                                                                                                                                                                                                                                                                                                                                                                                                                                                                                                                                                                                                                                                                                                                                                                                                                                                                                                                                                                                                                                                                                                                                                                                                                                                                                                                                                                                                                                                                                                                                                                                                                                                                                                                                                                                                                                                                                                                                                                                                                                                                                                                                                                                                                                                                                                                                                                                                                                                                                                                                                                                                                                                                                                                                                                                                                                                                                                                                                                                                                                                                                                                                                                                                                                                                                                                                                                                                                                                                                                                                                                                                                                                                                                                                                                                                                                                                                                                                                                                                                                                                                                                                                                                                                                                                                                                                                                                                                                                                                                         |  | 1 | 2 |   |   | 1 | 1 |   |   |   | 1 |   | 1 | 1  |   |
| arCG06534 | R | General function prediction only | - | Cohesin domain containing secreted protein                                     |          | pfam00963            | cd08547          |                                                                                                                                                                                                                                                                                                                                                                                                                                                                                                                                                                                                                                                                                                                                                                                                                                                                                                                                                                                                                                                                                                                                                                                                                                                                                                                                                                                                                                                                                                                                                                                                                                                                                                                                                                                                                                                                                                                                                                                                                                                                                                                                                                                                                                                                                                                                                                                                                                                                                                                                                                                                                                                                                                                                                                                                                                                                                                                                                                                                                                                                                                                                                                                                                                                                                                                                                                                                                                                                                                                                                                                                                                                                                                                                                                                                                                                                                                                                                                                                                                                                                                                                                                                                                                                                                                                                                                                                                                                                                                                                                                                                                                                   |  |   |   |   | 1 |   |   |   |   |   | 1 |   |   |    |   |
| arCG07590 | R | General function prediction only | - | Predicted acyl esterase                                                        | COG02936 | pfam02129, pfam08530 |                  | TIGR00976                                                                                                                                                                                                                                                                                                                                                                                                                                                                                                                                                                                                                                                                                                                                                                                                                                                                                                                                                                                                                                                                                                                                                                                                                                                                                                                                                                                                                                                                                                                                                                                                                                                                                                                                                                                                                                                                                                                                                                                                                                                                                                                                                                                                                                                                                                                                                                                                                                                                                                                                                                                                                                                                                                                                                                                                                                                                                                                                                                                                                                                                                                                                                                                                                                                                                                                                                                                                                                                                                                                                                                                                                                                                                                                                                                                                                                                                                                                                                                                                                                                                                                                                                                                                                                                                                                                                                                                                                                                                                                                                                                                                                                         |  | 3 | 4 | 1 | 2 | 2 | 2 |   |   |   | 1 |   | 2 | 5  |   |
| arCG05343 | R | General function prediction only | - | GTPase SAR1 or related small G protein                                         | COG01100 | pfam00071            | cd00154          |                                                                                                                                                                                                                                                                                                                                                                                                                                                                                                                                                                                                                                                                                                                                                                                                                                                                                                                                                                                                                                                                                                                                                                                                                                                                                                                                                                                                                                                                                                                                                                                                                                                                                                                                                                                                                                                                                                                                                                                                                                                                                                                                                                                                                                                                                                                                                                                                                                                                                                                                                                                                                                                                                                                                                                                                                                                                                                                                                                                                                                                                                                                                                                                                                                                                                                                                                                                                                                                                                                                                                                                                                                                                                                                                                                                                                                                                                                                                                                                                                                                                                                                                                                                                                                                                                                                                                                                                                                                                                                                                                                                                                                                   |  |   |   |   | 1 | 1 | 2 |   |   |   | 1 |   |   |    |   |
| arCG03439 | R | General function prediction only | - | vWFA domain containing protein                                                 |          |                      |                  |                                                                                                                                                                                                                                                                                                                                                                                                                                                                                                                                                                                                                                                                                                                                                                                                                                                                                                                                                                                                                                                                                                                                                                                                                                                                                                                                                                                                                                                                                                                                                                                                                                                                                                                                                                                                                                                                                                                                                                                                                                                                                                                                                                                                                                                                                                                                                                                                                                                                                                                                                                                                                                                                                                                                                                                                                                                                                                                                                                                                                                                                                                                                                                                                                                                                                                                                                                                                                                                                                                                                                                                                                                                                                                                                                                                                                                                                                                                                                                                                                                                                                                                                                                                                                                                                                                                                                                                                                                                                                                                                                                                                                                                   |  |   |   |   | 2 |   |   |   |   |   | 1 |   |   | 3  |   |
| arCG04179 | R | General function prediction only | - | DNA-binding TFAR19-related protein, PDSD5 family                               | COG02118 | pfam01984            |                  |                                                                                                                                                                                                                                                                                                                                                                                                                                                                                                                                                                                                                                                                                                                                                                                                                                                                                                                                                                                                                                                                                                                                                                                                                                                                                                                                                                                                                                                                                                                                                                                                                                                                                                                                                                                                                                                                                                                                                                                                                                                                                                                                                                                                                                                                                                                                                                                                                                                                                                                                                                                                                                                                                                                                                                                                                                                                                                                                                                                                                                                                                                                                                                                                                                                                                                                                                                                                                                                                                                                                                                                                                                                                                                                                                                                                                                                                                                                                                                                                                                                                                                                                                                                                                                                                                                                                                                                                                                                                                                                                                                                                                                                   |  |   |   |   |   |   |   |   |   |   | 1 |   | 1 |    |   |
| arCG00601 | R | General function prediction only | - | Protein containing two CBS domains (some fused to C-terminal double-strand)    | COG00517 | pfam00571, pfam0057  | cd04633, cd046   | TIGR01302, TIGR01302                                                                                                                                                                                                                                                                                                                                                                                                                                                                                                                                                                                                                                                                                                                                                                                                                                                                                                                                                                                                                                                                                                                                                                                                                                                                                                                                                                                                                                                                                                                                                                                                                                                                                                                                                                                                                                                                                                                                                                                                                                                                                                                                                                                                                                                                                                                                                                                                                                                                                                                                                                                                                                                                                                                                                                                                                                                                                                                                                                                                                                                                                                                                                                                                                                                                                                                                                                                                                                                                                                                                                                                                                                                                                                                                                                                                                                                                                                                                                                                                                                                                                                                                                                                                                                                                                                                                                                                                                                                                                                                                                                                                                              |  |   |   |   |   |   |   |   |   |   | 1 |   |   |    |   |
| arCG02935 | R | General function prediction only | - | Pirin-related protein                                                          | COG01741 | pfam02678, pfam05726 |                  |                                                                                                                                                                                                                                                                                                                                                                                                                                                                                                                                                                                                                                                                                                                                                                                                                                                                                                                                                                                                                                                                                                                                                                                                                                                                                                                                                                                                                                                                                                                                                                                                                                                                                                                                                                                                                                                                                                                                                                                                                                                                                                                                                                                                                                                                                                                                                                                                                                                                                                                                                                                                                                                                                                                                                                                                                                                                                                                                                                                                                                                                                                                                                                                                                                                                                                                                                                                                                                                                                                                                                                                                                                                                                                                                                                                                                                                                                                                                                                                                                                                                                                                                                                                                                                                                                                                                                                                                                                                                                                                                                                                                                                                   |  |   |   |   |   |   |   |   |   |   | 1 |   | 1 |    |   |
| arCG02289 | R | General function prediction only | - | Uncharacterized protein, DUF169 family                                         | COG02043 | pfam02596            |                  |                                                                                                                                                                                                                                                                                                                                                                                                                                                                                                                                                                                                                                                                                                                                                                                                                                                                                                                                                                                                                                                                                                                                                                                                                                                                                                                                                                                                                                                                                                                                                                                                                                                                                                                                                                                                                                                                                                                                                                                                                                                                                                                                                                                                                                                                                                                                                                                                                                                                                                                                                                                                                                                                                                                                                                                                                                                                                                                                                                                                                                                                                                                                                                                                                                                                                                                                                                                                                                                                                                                                                                                                                                                                                                                                                                                                                                                                                                                                                                                                                                                                                                                                                                                                                                                                                                                                                                                                                                                                                                                                                                                                                                                   |  |   |   |   |   |   |   |   |   |   |   |   |   |    |   |
| arCG03994 | R | General function prediction only | - | PKD domain containing protein                                                  | COG03291 | pfam05048, pfam0080  | cd14251, cd001   | TIGR04247, TIGR04275, |  |   |   |   |   |   |   |   |   |   |   |   |   |    |   |

[illegible]

[illegible]
