# Supplementary material
Source: PubMed Central journal article supplement (PMC5437922)
Supplement: ismej2016188x8.pdf [file ismej2016188x8.pdf]

Supplementary Table 6. Classification of the unique genes based on the arCOG classification.

|                                    | arCOG classification | gene                                            | product                                                                                 | LUG classification | pFAM domain    | cdc             | TIGR classification | Number of genes |        |        |                |         |
|------------------------------------|----------------------|-------------------------------------------------|-----------------------------------------------------------------------------------------|--------------------|----------------|-----------------|---------------------|-----------------|--------|--------|----------------|---------|
|                                    |                      |                                                 |                                                                                         |                    |                |                 |                     | EPPEL/MGIII     | BATHY1 | BATHY2 | TRANSBIO/chaes | MG2-GG3 |
| INFORMATION STORAGE AND PROCESSING |                      |                                                 |                                                                                         |                    |                |                 |                     |                 |        |        |                |         |
| arCOG00415                         | L                    | Replication, recombination and repair           | RecA RecA/RadA recombinase                                                              | COG00468           | pfam14520.pfam | c001123         | TIGR02236           | 1               |        |        |                |         |
| arCOG00439                         | L                    | Replication, recombination and repair           | MCM2 Predicted ATPase involved in replication control, Cdc46/Mcm family                 | COG01241           | pfam14551.pfam | c000009         |                     | 1               |        |        |                |         |
| arCOG00410                         | L                    | Replication, recombination and repair           | PR11 Eukaryotic-type DNA primase, catalytic (small) subunit                             | COG01467           | pfam01896      | c004860         | TIGR00335           |                 |        | 1      | 1              |         |
| arCOG00787                         | L                    | Replication, recombination and repair           | - UvrD/Rep family helicase fused to exonuclease family domain                           | COG02887           | pfam12705      | c009637         | TIGR01249,TIGR00372 | 1               |        |        |                |         |
| arCOG00519                         | L                    | Replication, recombination and repair           | DnaQ DNA polymerase III, epsilon subunit or related 3'-5' exonuclease                   | COG00847           | pfam00929      | c006127         | TIGR00573           | 1               |        |        | 1              |         |
| arCOG01898                         | L                    | Replication, recombination and repair           | UvrC UV damage repair endonuclease                                                      | COG04294           | pfam01851      | c000009         | TIGR00629           | 1               |        |        |                |         |
| arCOG00469                         | L                    | Replication, recombination and repair           | HolB ATPase involved in DNA replication HolB, small subunit                             | COG04070           | pfam13177.pfam | c000009         | TIGR02397           | 2               |        |        | 1              |         |
| arCOG01894                         | L                    | Replication, recombination and repair           | Nfo Endonuclease IV                                                                     | COG00648           | pfam01261      | c000019         | TIGR00587           | 2               |        |        |                |         |
| arCOG01073                         | L                    | Replication, recombination and repair           | - NUDIX family hydrolase                                                                | COG00494           | pfam00293      | c003424         | TIGR00052           | 2               |        |        |                |         |
| arCOG001347                        | L                    | Replication, recombination and repair           | CDG9 ATP-dependent DNA ligase                                                           | COG01793           | pfam04675.pfam | c007901,c0079   | TIGR00574           | 2               |        |        |                |         |
| arCOG002840                        | L                    | Replication, recombination and repair           | PhrB Deoxyribodipyrimidine photolyase                                                   | COG00415           | pfam00875.pfam | c03441          | TIGR03556           | 2               |        |        |                | 1       |
| arCOG01078                         | L                    | Replication, recombination and repair           | - NUDIX family hydrolase                                                                | COG00494           | pfam00293      | c003428         |                     | 3               | 1      |        | 1              | 1       |
| arCOG00464                         | L                    | Replication, recombination and repair           | AKA 3-methyladenine DNA glycosylase/B-oxoguanine DNA glycosylase                        | COG00122           | pfam07934.pfam | c000056         | TIGR00588           |                 |        | 3      | 1              | 1       |
| arCOG01342                         | L                    | Replication, recombination and repair           | Nuclease of RNase H fold, RuvC/YagG family                                              | COG01711           |                |                 |                     | 3               |        | 1      | 1              | 1       |
| arCOG01486                         | L                    | Replication, recombination and repair           | RrmV 5S rRNA maturation endonuclease (Ribonuclease M5), contains TOPRIM domain          | COG01658           | pfam01751      | c001027         |                     | 4               | 1      |        | 1              | 1       |
| arCOG00849                         | L                    | Replication, recombination and repair           | - Topoisomerase IIb                                                                     | COG03569           | pfam02919.pfam | c000660,c000659 |                     |                 |        |        | 1              | 1       |
| arCOG00417                         | L                    | Replication, recombination and repair           | RecA RecA/RadA recombinase                                                              | COG00468           |                | c01394          | TIGR02237           | 5               |        |        |                |         |
| arCOG04367                         | L                    | Replication, recombination and repair           | GyrA Type IIA topoisomerase (DNA gyrase/topo II, topoisomerase IV), A subunit           | COG00188           | pfam00521.pfam | c000187         | TIGR01063           |                 |        |        | 2              |         |
| arCOG00872                         | L                    | Replication, recombination and repair           | MPH1 ERCC4-like helicase                                                                | COG00187           | pfam02518.pfam | c000075,c0008   | TIGR00596           |                 |        |        | 2              | 1       |
| arCOG00551                         | L                    | Replication, recombination and repair           | GnaN DNA polymerase sliding clamp subunit (PCNA homolog)                                | COG00592           | pfam02075.pfam | c000077         | TIGR00590           |                 |        | 1      |                |         |
| arCOG00427                         | L                    | Replication, recombination and repair           | RecJ/CdcJ Single-stranded DNA-specific exonuclease RecJ                                 | COG00608           |                | c011714         | TIGR00643,TIGR00580 |                 |        |        |                |         |
| arCOG02258                         | L                    | Replication, recombination and repair           | RPA family protein, a subunit of RPA complex in P. furiosus                             | COG03390           |                |                 |                     |                 |        |        | 2              |         |
| arCOG01166                         | L                    | Replication, recombination and repair           | MutL DNA mismatch repair enzyme (predicted ATPase)                                      | COG00323           | pfam13589.pfam | c000075,c0007   | TIGR00585           |                 |        |        |                |         |
| arCOG04121                         | L                    | Replication, recombination and repair           | RnhB Ribonuclease HII                                                                   | COG00164           | pfam01351      | c007180         | TIGR00729           |                 |        |        | 2              |         |
| arCOG00470                         | L                    | Replication, recombination and repair           | HolB ATPase involved in DNA replication HolB, large subunit                             | COG04070           | pfam00004      | c000009         | TIGR02397           |                 |        |        | 1              | 1       |
| arCOG04371                         | L                    | Replication, recombination and repair           | GyrB Type IIA topoisomerase (DNA gyrase/topo II, topoisomerase IV), B subunit           | COG00187           | pfam02518.pfam | c000075,c0008   | TIGR01059           |                 |        |        | 1              | 1       |
| arCOG00408                         | L                    | Replication, recombination and repair           | DnaN DNA polymerase sliding clamp subunit (PCNA homolog)                                | COG00592           | pfam02075.pfam | c000077         | TIGR00590           |                 |        |        | 2              | 1       |
| arCOG01527                         | L                    | Replication, recombination and repair           | TopA Topoisomerase IIA                                                                  | COG00500           | pfam01751.pfam | c003362,c0001   | TIGR01057           |                 |        | 1      |                |         |
| arCOG04050                         | L                    | Replication, recombination and repair           | FEN1 5'-3' exonuclease                                                                  | COG00258           | pfam00752.pfam | c009867         | TIGR03674           |                 |        | 1      |                |         |
| arCOG00558                         | L                    | Replication, recombination and repair           | SrmB Superfamily II DNA and RNA helicase                                                | COG00513           | pfam00270.pfam | c000268,c0000   | TIGR01389           |                 |        |        | 1              | 2       |
| arCOG00328                         | L                    | Replication, recombination and repair           | PolB3 DNA polymerase PolB3                                                              | COG00417           | pfam03104.pfam | c005781,c0055   | TIGR00592           |                 |        |        | 4              | 1       |
| arCOG01510                         | L                    | Replication, recombination and repair           | RPA1 Single-stranded DNA-binding replication protein A (RPA), large (70 kD) subunit     | COG01599           |                | c004491,c004491 |                     | 2               |        |        | 2              | 1       |
| arCOG01072                         | L                    | Replication, recombination and repair           | NUDX family hydrolase                                                                   | COG00494           | pam00293       | c003426         |                     |                 |        |        |                |         |
| arCOG00313                         | L                    | Replication, recombination and repair           | PRI2 Eukaryotic-type DNA primase, large subunit                                         | COG00122           | pam04104       | c000560         |                     |                 | 1      |        |                |         |
| arCOG00553                         | L                    | Replication, recombination and repair           | BRR2 Replicative superfamily II helicase                                                | COG01204           | pam00270.pfam  | c000046,c0000   | TIGR04121           |                 |        |        | 3              | 1       |
| arCOG01526                         | L                    | Replication, recombination and repair           | TopG2 Reverse gyrase                                                                    | COG01110           | pam00270.pfam  | c000046,c0033   | TIGR01054           |                 |        |        | 2              |         |
| arCOG00368                         | L                    | Replication, recombination and repair           | SbcC ATPase involved in DNA repair, SbcC                                                | COG00419           | pfam13476.pfam | c003240,c0001   | TIGR00611,TIGR02168 |                 |        | 1      |                |         |
| arCOG002724                        | L                    | Replication, recombination and repair           | Ada Methylated DNA-protein cysteine methyltransferase                                   | COG00350           | pam01035       | c006445         | TIGR00589           |                 |        | 1      |                |         |
| arCOG00397                         | L                    | Replication, recombination and repair           | SbcD DNA repair exonuclease, SbcD                                                       | COG00420           | pam00149       | c000840         |                     |                 |        |        |                |         |
| arCOG00329                         | L                    | Replication, recombination and repair           | PolB2 DNA polymerase PolB2, inactivated                                                 | COG00137           | pam000136      | c005531         | TIGR00592           |                 |        |        | 1              | 1       |
| arCOG00802                         | L                    | Replication, recombination and repair           | RecB ATP-dependent endonuclease (exonuclease V) beta subunit (contains helicase)        | COG01074           | pfam00280.pfam | c001381         | TIGR00785           |                 |        |        | 2              | 1       |
| arCOG00295                         | L                    | Replication, recombination and repair           | MutS2 DNA structure-specific ATPase involved in suppression of recombination, MutS      | COG01153           | pfam00408      | c003243         | TIGR01069           |                 |        |        | 1              | 1       |
| arCOG04094                         | L                    | Replication, recombination and repair           | UvrA Excinuclease ABC subunit A, ATPase                                                 | COG00178           |                | c003271,c0032   | TIGR00630           |                 |        |        | 3              | 1       |
| arCOG00462                         | L                    | Replication, recombination and repair           | MutY A/G-specific DNA glycosylase                                                       | COG01194           | pam00730       | c000056         | TIGR01084           |                 |        |        | 3              | 1       |
| arCOG03646                         | L                    | Replication, recombination and repair           | XseB Exonuclease VII small subunit                                                      | COG01722           | pam02609       |                 | TIGR01280           |                 |        |        | 1              |         |
| arCOG04513                         | L                    | Replication, recombination and repair           | XseA Exonuclease VII, large subunit                                                     | COG01570           | pam13742.pfam  | c004489         | TIGR00575           |                 |        |        | 1              |         |
| arCOG04754                         | L                    | Replication, recombination and repair           | Lig DNA-dependent DNA ligase                                                            | COG00272           | pfam01655.pfam | c000114,c0000   | TIGR00575           |                 |        |        | 1              | 1       |
| arCOG07100                         | L                    | Replication, recombination and repair           | Uncharacterized protein associated with inactivated PolB-like polymerase                | COG00494           | pam00293       | c002885         |                     |                 |        |        |                |         |
| arCOG01082                         | L                    | Replication, recombination and repair           | NUDX family hydrolase                                                                   | COG00494           | pam00293       | c002885         |                     |                 |        |        |                |         |
| arCOG001305                        | L                    | Replication, recombination and repair           | - Topoisomerase DNA binding C4 zinc finger fused to uncharacterized N-termi             | COG01637           |                |                 |                     |                 |        |        |                |         |
| arCOG00296                         | L                    | Replication, recombination and repair           | MutS Mismatch repair ATPase (MutS family)                                               | COG00249           | pam01624.pfam  | c003284         | TIGR01070           |                 |        |        | 1              |         |
| arCOG01981                         | K                    | Transcription                                   | SUA7 Transcription initiation factor TFIIB, Bf1 subunit/Transcription initiation factor | COG01405           | pfam08271.pfam | c000043         |                     | 5               | 1      |        |                |         |
| arCOG01863                         | K                    | Transcription                                   | - Predicted transcription factor, homolog of eukaryotic MBF1                            | COG01813           | pam01381       | c000093         | TIGR00270           |                 | 3      | 1      | 1              |         |
| arCOG02611                         | K                    | Transcription                                   | - Predicted transcriptional regulator, contain two HTH domains                          | COG03398           | pfam13412.pfam | c000090,c000090 |                     |                 | 3      | 1      | 2              | 1       |
| arCOG07561                         | K                    | Transcription                                   | - Predicted menase associated transcriptional regulator                                 | COG02512           |                |                 |                     |                 | 3      | 1      | 1              | 4       |
| arCOG00770                         | K                    | Transcription                                   | DinG Rad3-related DNA helicase                                                          | COG01199           | pam06733.pfam  | c03307          | TIGR00604           |                 | 2      | 1      | 2              | 1       |
| arCOG005671                        | K                    | Transcription                                   | CsgD Transcriptional regulator LuxR family                                              | COG02771           |                |                 |                     | 2               |        |        |                |         |
| arCOG01680                         | K                    | Transcription                                   | ArxR Transcriptional regulator containing HTH domain, ArxR family                       | COG00640           | pam01022       | c000090         |                     | 1               |        |        | 1              |         |
| arCOG04280                         | K                    | Transcription                                   | NagC Transcriptional regulator/sugar kinase                                             | COG01940           | pam00480       | c000012         | TIGR00744           |                 | 1      |        |                |         |
| arCOG01753                         | K                    | Transcription                                   | Ssh10b Archaeal DNA-binding protein                                                     | COG01581           | pam01918       |                 | TIGR00285           |                 | 1      |        |                |         |
| arCOG00579                         | K                    | Transcription                                   | RPB9 DNA-directed RNA polymerase, subunit M/Transcription elongation factor             | COG01777           | pam01022       | c000090,c000090 |                     |                 |        |        |                |         |
| arCOG01684                         | K                    | Transcription                                   | Transcriptional regulator, ArxR family                                                  | COG01777           | pam01022       | c000090,c000090 |                     |                 |        |        | 3              | 1       |
| arCOG00675                         | K                    | Transcription                                   | RPB7 DNA-directed RNA polymerase, subunit E'/Rpb7                                       | COG01095           | pam01387.pfam  | c004331,c0044   | TIGR00448           |                 |        |        |                |         |
| arCOG04258                         | K                    | Transcription                                   | RPB5 DNA-directed RNA polymerase, subunit H, RpoH/RPB5                                  | COG02012           | pam01191       |                 |                     |                 |        |        | 1              | 1       |
| arCOG01580                         | K                    | Transcription                                   | - DNA-binding transcriptional regulator, Lrp family                                     | COG01522           | pfam13412.pfam | c000090         |                     |                 | 1      |        |                |         |
| arCOG005161                        | K                    | Transcription                                   | WecD Acetyltransferase (GNAT) family                                                    | COG00454           |                |                 |                     |                 | 1      |        |                |         |
| arCOG01711                         | K                    | Transcription                                   | RNA-directed RNA polymerase, subunit L                                                  | COG01761           | pam13656       | c006927         |                     |                 |        |        | 1              | 1       |
| arCOG01764                         | K                    | Transcription                                   | SPT15 TATA-box binding protein (TBP), component of TFIID and TFIIB                      | COG02101           | pam00352.pfam  | c004518         |                     |                 |        |        |                |         |
| arCOG00209                         | K                    | Transcription                                   | TroA Non-dependent transcriptional regulator (DlxR family)                              | COG00121           | pam01325.pfam  | c001242,c0014   | TIGR04023           |                 |        |        | 1              | 1       |
| arCOG02421                         | K                    | Transcription                                   | RpoA/RpoA DNA-directed RNA polymerase subunit D                                         | COG00202           | pam01193       | c007030         |                     |                 |        |        | 1              | 1       |
| arCOG02038                         | K                    | Transcription                                   | - Sugar-specific transcriptional regulator TrmB                                         | COG01378           |                |                 |                     |                 |        |        |                |         |
| arCOG02037                         | K                    | Transcription                                   | - Sugar-specific transcriptional regulator TrmB                                         | COG01378           | pam01978       |                 |                     |                 |        |        | 1              | 1       |
| arCOG01057                         | K                    | Transcription                                   | HvIR DNA-binding transcriptional regulator, HvIR family                                 | COG01733           | pam01638       | c000090         |                     |                 |        |        | 1              | 3       |
| arCOG00608                         | K                    | Transcription                                   | - Predicted transcriptional regulator with C-terminal CBS domains                       | COG03620           | pam01381.pfam  | c000093,c0048   | TIGR03070,TIGR01137 |                 |        |        |                |         |
| arCOG04248                         | K                    | Transcription                                   | SIR2 NAD-dependent protein deacetylase, SIR2 family                                     | COG00846           | pam01246       | c000143         |                     |                 |        |        | 1              |         |
| arCOG04177                         | K                    | Transcription                                   | - Transcriptional regulator Mark family, contains HTH domain                            | COG04738           |                |                 |                     |                 |        |        |                |         |
| arCOG00826                         | K                    | Transcription                                   | WecD Acetyltransferase (GNAT) family                                                    | COG00454           | pam00583       | c004301         | TIGR01575           |                 |        |        |                |         |
| arCOG02644                         | K                    | Transcription                                   | AcrR Transcriptional regulator, TetR/AcrR family                                        | COG01309           | pam00440       |                 | TIGR01613           |                 |        |        | 1              | 1       |
| arCOG005152                        | K                    | Transcription                                   | - Transcriptional regulator, contains HTH domain                                        |                    |                |                 |                     |                 |        |        |                |         |
| arCOG002271                        | K                    | Transcription                                   | - Transcriptional regulator, contains HTH domain                                        | COG03413           | pam04967       |                 |                     |                 |        |        | 4              | 2       |
| arCOG02274                         | K                    | Transcription                                   | - Transcriptional regulator, contains HTH domain                                        | COG03413           | pam04967       |                 |                     |                 |        |        |                | 3       |
| arCOG02280                         | K                    | Transcription                                   | - Transcriptional regulator, contains HTH domain                                        | COG03413           | pam04967       |                 |                     |                 |        |        | 1              |         |
| arCOG04818                         | K                    | Transcription                                   | HepA Superfamily II DNA/RNA helicase, SBF2 family                                       | COG00553           | pam13091.pfam  | c009178,c0000   | TIGR01587           |                 |        |        |                |         |
| arCOG02197                         | J                    | Translation, ribosomal structure and biogenesis | Cgi121 Subunit of KEOPS complex (Cgi121-BUD32KAE1)                                      | COG01617           | pam008617      |                 |                     | 5               | 1      |        |                |         |
| arCOG04107                         |                      |                                                 |                                                                                         |                    |                |                 |                     |                 |        |        |                |         |

|                                         |   |                                                            |           |                                                                              |          |                                                       |           |  |  |  |   |   |   |   |
|-----------------------------------------|---|------------------------------------------------------------|-----------|------------------------------------------------------------------------------|----------|-------------------------------------------------------|-----------|--|--|--|---|---|---|---|
| arCG001741                              | J | Translation, ribosomal structure and biogenesis            | PeaA      | Release factor eRF1                                                          | CG001537 | pfam03463, pfam03464, pfam03465                       | TIGR00111 |  |  |  | 1 |   | 2 | 1 |
| arCG004042                              | J | Translation, ribosomal structure and biogenesis            | PheT      | Phenylalanyl-tRNA synthetase beta subunit                                    | CG000702 | pfam03483, pfam03484, pfam03485                       | TIGR00471 |  |  |  |   |   | 2 | 1 |
| arCG004043                              | J | Translation, ribosomal structure and biogenesis            | ProS      | Prolyl-tRNA synthetase                                                       | CG000442 | pfam00587, pfam00588, pfam00589                       | TIGR00408 |  |  |  |   |   |   |   |
| arCG004228                              | J | Translation, ribosomal structure and biogenesis            | Phi2      | Phosphatidyl RNA hydrolase                                                   | CG001990 | pfam01981, cd04230                                    | TIGR00281 |  |  |  |   |   | 2 | 2 |
| arCG001015                              | J | Translation, ribosomal structure and biogenesis            | Pus10     | tRNA U54 and U55 pseudouridine synthase Pus10                                | CG001258 | pfam00508                                             | TIGR01213 |  |  |  |   |   | 1 | 1 |
| arCG000399                              | J | Translation, ribosomal structure and biogenesis            | QueC      | 7-cyano-7-deazaquinone synthase (queuosine biosynthesis)                     | CG000603 | pfam00508                                             | TIGR00364 |  |  |  |   | 1 |   |   |
| arCG005111                              | J | Translation, ribosomal structure and biogenesis            | RimH      | 23S rRNA pseudouridylation N3-methylase RimH                                 | CG001576 | pfam02590                                             | TIGR00246 |  |  |  |   |   | 1 | 1 |
| arCG006660                              | J | Translation, ribosomal structure and biogenesis            | RluA      | Pseudouridylation synthase, 23S rRNA-specific                                | CG000564 | pfam00849                                             | TIGR00005 |  |  |  |   |   |   |   |
| arCG000780                              | J | Translation, ribosomal structure and biogenesis            | RPL18A    | Ribosomal protein L18E                                                       | CG001277 | pfam00828                                             | TIGR01071 |  |  |  |   |   | 1 | 1 |
| arCG004075                              | J | Translation, ribosomal structure and biogenesis            | RPL20A    | Ribosomal protein L20A (L18A)                                                | CG002157 | pfam01775                                             |           |  |  |  |   |   | 1 | 1 |
| arCG001590                              | J | Translation, ribosomal structure and biogenesis            | RPL24A    | Ribosomal protein L24E                                                       | CG000075 | pfam01246, cd04072                                    |           |  |  |  |   |   | 1 | 1 |
| arCG001752                              | J | Translation, ribosomal structure and biogenesis            | RPL30     | Ribosomal protein L30E                                                       | CG001911 | pfam01246                                             |           |  |  |  |   | 1 |   |   |
| arCG004049                              | J | Translation, ribosomal structure and biogenesis            | RPL40A    | Ribosomal protein L40E                                                       | CG001552 |                                                       |           |  |  |  |   |   | 1 |   |
| arCG004208                              | J | Translation, ribosomal structure and biogenesis            | RPL43A    | Ribosomal protein L37AE/L43A                                                 | CG001997 | pfam01780                                             | TIGR00280 |  |  |  |   |   | 1 | 1 |
| arCG004288                              | J | Translation, ribosomal structure and biogenesis            | RplJ      | Ribosomal protein L10                                                        | CG002044 | pfam00466                                             |           |  |  |  |   |   | 1 | 1 |
| arCG004372                              | J | Translation, ribosomal structure and biogenesis            | RplK      | Ribosomal protein L11                                                        | CG000800 | pfam03946, pfam03947                                  | TIGR01632 |  |  |  |   |   | 2 | 1 |
| arCG004094                              | J | Translation, ribosomal structure and biogenesis            | RplX      | Ribosomal protein L24                                                        | CG001098 | pfam01015                                             | TIGR01080 |  |  |  |   |   | 2 | 1 |
| arCG004186                              | J | Translation, ribosomal structure and biogenesis            | RPS1A     | Ribosomal protein S3AC                                                       | CG001498 | pfam010415                                            |           |  |  |  |   |   | 1 | 1 |
| arCG004182                              | J | Translation, ribosomal structure and biogenesis            | RPS24A    | Ribosomal protein S24E                                                       | CG002004 | pfam01282                                             |           |  |  |  |   |   | 1 | 1 |
| arCG004239                              | J | Translation, ribosomal structure and biogenesis            | RpsD      | Ribosomal protein S4 or related protein                                      | CG000522 | pfam00183, pfam00165                                  | TIGR01018 |  |  |  |   |   | 1 | 1 |
| arCG000678                              | J | Translation, ribosomal structure and biogenesis            | Rrp4      | Exosome complex RNA-binding protein Rrp4, contains S1 and KH domains         | CG001097 | pfam00398                                             |           |  |  |  |   |   | 1 | 1 |
| arCG004131                              | J | Translation, ribosomal structure and biogenesis            | RsmA      | 16S rRNA A1518 and A1519 N6-dimethyltransferase RsmA/KsgA/DIM1               | CG000300 | pfam00398                                             | TIGR00755 |  |  |  |   |   | 1 | 1 |
| arCG004164                              | J | Translation, ribosomal structure and biogenesis            | RtcB      | RNA 3'-P ligase, RtcB family protein                                         | CG001690 | pfam01139                                             | TIGR03073 |  |  |  |   |   | 1 | 1 |
| arCG001564                              | J | Translation, ribosomal structure and biogenesis            | SelB      | Selenocysteine-specific translation elongation factor or SelB-II domain      | CG003276 | pfam01798                                             | TIGR00475 |  |  |  |   |   | 1 | 1 |
| arCG001023                              | J | Translation, ribosomal structure and biogenesis            | SEN1      | RNA processing factor Sen1, contains Nsp domain                              | CG001498 | pfam01798                                             |           |  |  |  |   |   | 1 | 1 |
| arCG001952                              | J | Translation, ribosomal structure and biogenesis            | SUA5      | tRNA A37 threonylcarbamoyladenosine synthetase subunit TscA/SUA5/YrcC        | CG000009 | pfam01300                                             | TIGR00057 |  |  |  |   |   | 1 | 1 |
| arCG004223                              | J | Translation, ribosomal structure and biogenesis            | SUI1      | Translation initiation factor 1 (eIF-1/SUI1)                                 | CG000023 | pfam01253                                             | TIGR01158 |  |  |  |   |   | 1 | 1 |
| arCG000056                              | J | Translation, ribosomal structure and biogenesis            | TAN1      | tRNA(Ser,Leu) C12 N-acetylase TAN1, contains THUMP domain                    | CG001818 | pfam02926, pfam01178, cd0061                          | TIGR00342 |  |  |  |   |   | 1 | 1 |
| arCG001630                              | J | Translation, ribosomal structure and biogenesis            | TdcF      | Translation initiation inhibitor, ygf family                                 | CG000251 | pfam01042                                             | TIGR00004 |  |  |  |   |   | 1 | 2 |
| arCG001561                              | J | Translation, ribosomal structure and biogenesis            | TEF1      | Translation elongation factor EF-1 alpha, GTPase                             | CG002556 | pfam00009, pfam01883, cd0036                          | TIGR00483 |  |  |  |   |   | 3 | 1 |
| arCG004041                              | J | Translation, ribosomal structure and biogenesis            | ThrS      | Threonyl-tRNA synthetase                                                     | CG000441 | pfam00587, pfam00588, pfam00589                       | TIGR00418 |  |  |  |   |   | 1 | 1 |
| arCG001115                              | J | Translation, ribosomal structure and biogenesis            | ThrL      | tRNA(Lys) 2'-O-acetyltransferase synthetase; containing Zn-ribon domain and  | CG001571 | pfam03483, pfam03484                                  |           |  |  |  |   |   | 1 | 1 |
| arCG004376                              | J | Translation, ribosomal structure and biogenesis            | TIF6      | Translation initiation factor 6 (eIF-6)                                      | CG001976 | pfam01912                                             | TIGR00323 |  |  |  |   |   | 1 | 1 |
| arCG001219                              | J | Translation, ribosomal structure and biogenesis            | TRM1      | N2,N2-dimethylguanosine tRNA methyltransferase                               | CG001867 | pfam02005                                             | TIGR00308 |  |  |  |   |   | 1 | 1 |
| arCG001018                              | J | Translation, ribosomal structure and biogenesis            | TrmJ      | tRNA C32 U32 (ribose-2'-O)-methylase TrmJ or a related methyltransferase     | CG000565 | pfam00588                                             | TIGR00050 |  |  |  |   |   | 1 | 2 |
| arCG000987                              | J | Translation, ribosomal structure and biogenesis            | TruB      | Pseudouridine synthase                                                       | CG001300 | pfam08068, pfam02572                                  | TIGR00425 |  |  |  |   |   | 1 | 1 |
| arCG004252                              | J | Translation, ribosomal structure and biogenesis            | TruD      | tRNA(Glu) U13 pseudouridine synthase TruD                                    | CG000585 | pfam01142                                             | TIGR00094 |  |  |  |   |   | 1 | 1 |
| arCG004733                              | J | Translation, ribosomal structure and biogenesis            | Tsr3      | Ribosome biogenesis protein Tsr3, contains Fer-1-like metal-binding domain   | CG002042 | pfam04034                                             |           |  |  |  |   |   |   |   |
| arCG005041                              | J | Translation, ribosomal structure and biogenesis            | YSH1      | Predicted exonuclease of the beta-lactamase fold involved in RNA processing  | CG001236 | pfam00753, pfam10996, pfam01070                       | TIGR03675 |  |  |  |   |   |   | 4 |
| <b>CELLULAR PROCESSES AND SIGNALING</b> |   |                                                            |           |                                                                              |          |                                                       |           |  |  |  |   |   |   |   |
| arCG011012                              | D | Cell cycle control, cell division, chromosome partitioning | ATS1      | Alpha-tubulin suppressor and related RCC1 domain-containing proteins         | CG001184 | pfam13540, pfam00415, pfam00415, pfam00415, pfam00415 |           |  |  |  |   |   | 1 | 2 |
| arCG002021                              | D | Cell cycle control, cell division, chromosome partitioning | FtsZ      | Cell division GTPase                                                         | CG002026 | pfam00091, pfam02021                                  | TIGR00065 |  |  |  | 5 |   |   |   |
| arCG005007                              | D | Cell cycle control, cell division, chromosome partitioning | MalF      | Nucleotide-binding protein implicated in inhibition of septum formation      | CG000424 | pfam02545                                             | TIGR00172 |  |  |  |   |   | 1 | 1 |
| arCG003061                              | D | Cell cycle control, cell division, chromosome partitioning | MrbB      | Actin-like ATPase involved in cell morphogenesis                             | CG001077 | pfam06723                                             | TIGR00904 |  |  |  |   |   | 1 | 1 |
| arCG005086                              | D | Cell cycle control, cell division, chromosome partitioning | Soj       | ATPase involved in chromosome partitioning, ParA family                      | CG001192 | pfam01656                                             | TIGR03453 |  |  |  |   |   |   |   |
| arCG004166                              | N | Cell motility                                              | FlaB      | Archaeal flagellin, FlaB/FliA family                                         | CG001343 | pfam07790                                             |           |  |  |  |   |   | 2 | 2 |
| arCG002079                              | N | Cell motility                                              | -         | S-layer protein, possibly associated with type IV pili-like system           | CG001361 |                                                       |           |  |  |  | 4 |   |   |   |
| arCG001829                              | N | Cell motility                                              | FlaB      | Archaeal flagellin                                                           | CG001681 |                                                       |           |  |  |  |   |   | 1 |   |
| arCG001822                              | N | Cell motility                                              | FlaG      | Archaealium protein G, flagellin of FlaG/FliA family                         | CG003354 |                                                       |           |  |  |  |   |   | 1 | 1 |
| arCG004148                              | N | Cell motility                                              | FlaH      | ATPase involved in biogenesis of archaealium                                 | CG002874 | pfam06745                                             | TIGR03881 |  |  |  |   |   | 1 | 1 |
| arCG001809                              | N | Cell motility                                              | FlaI      | Archaealium assembly protein I, TadC family                                  | CG001955 |                                                       |           |  |  |  |   |   | 1 | 1 |
| arCG002298                              | N | Cell motility                                              | FlaK/PadK | Peptidase A24A, prepilin type IV                                             | CG001989 | pfam01478, pfam05847                                  |           |  |  |  |   |   | 1 | 1 |
| arCG001817                              | N | Cell motility                                              | VirB11    | ATPase involved in archaealium/pili biosynthesis                             | CG000630 | pfam00417                                             | TIGR03819 |  |  |  |   |   | 1 | 1 |
| arCG001014                              | M | Cell wall/membrane/envelope biogenesis                     | AgfA      | Glycosyltransferase                                                          | CG000438 | pfam13579, pfam03794                                  | TIGR02149 |  |  |  | 9 | 2 |   |   |
| arCG000118                              | M | Cell wall/membrane/envelope biogenesis                     | WecE      | Predicted pyridoxal phosphate-dependent enzyme apparently involved in ne     | CG000399 | pfam01041                                             | TIGR03588 |  |  |  |   |   | 1 | 1 |
| arCG000894                              | M | Cell wall/membrane/envelope biogenesis                     | -         | Glycosyl transferase family 2                                                | CG000463 | pfam00535                                             | TIGR04182 |  |  |  | 7 |   | 1 | 1 |
| arCG000666                              | M | Cell wall/membrane/envelope biogenesis                     | GCD1      | N-acetylglucosamine-1-phosphate uridylyltransferase                          | CG001208 | pfam00483, pfam04181, cd0056                          | TIGR03992 |  |  |  | 4 |   | 1 | 1 |
| arCG001568                              | M | Cell wall/membrane/envelope biogenesis                     | MscS      | Small-conductance mechanosensitive channel                                   | CG000668 | pfam00924                                             |           |  |  |  | 4 |   | 5 | 2 |
| arCG004141                              | M | Cell wall/membrane/envelope biogenesis                     | RfaG      | Glycosyltransferase                                                          | CG000438 | pfam13439, pfam03801                                  | TIGR03999 |  |  |  | 4 |   | 3 | 1 |
| arCG000252                              | M | Cell wall/membrane/envelope biogenesis                     | WecC      | UDP-N-acetyl-D-mannosaminuronic dehydrogenase                                | CG000677 | pfam01371, pfam005266                                 | TIGR03026 |  |  |  | 3 |   |   |   |
| arCG003336                              | M | Cell wall/membrane/envelope biogenesis                     | -         | Surface protein containing fasciclin-like repeats                            | CG002335 | pfam02469                                             |           |  |  |  | 3 |   | 1 | 1 |
| arCG004103                              | M | Cell wall/membrane/envelope biogenesis                     | AgfL      | Glycosyltransferase                                                          | CG000438 | pfam13439, pfam03804                                  |           |  |  |  | 3 |   | 5 | 2 |
| arCG002209                              | M | Cell wall/membrane/envelope biogenesis                     | AgfR      | MATE family membrane protein, RfbX family                                    | CG002244 | cd013128                                              |           |  |  |  | 3 | 1 |   |   |
| arCG000899                              | M | Cell wall/membrane/envelope biogenesis                     | AgfD2     | Predicted flippase                                                           | CG000392 | pfam01706                                             | TIGR00374 |  |  |  |   |   |   |   |
| arCG000668                              | M | Cell wall/membrane/envelope biogenesis                     | GCD1      | Nucleoside-diphosphate-sugar pyrophosphorylase involved in lipopolysaccha    | CG001208 | pfam00483, pfam04181, cd0056                          | TIGR03992 |  |  |  | 2 |   |   |   |
| arCG006759                              | M | Cell wall/membrane/envelope biogenesis                     | RfaG      | Glycosyltransferase                                                          | CG000438 |                                                       |           |  |  |  | 2 |   |   |   |
| arCG001222                              | M | Cell wall/membrane/envelope biogenesis                     | TagD      | Cytoplasmic transferase fused to conserved domain of DUF357 family           | CG000615 | pfam01467                                             | TIGR02199 |  |  |  | 2 |   |   |   |
| arCG003335                              | M | Cell wall/membrane/envelope biogenesis                     | -         | Surface protein containing fasciclin-like repeats                            | CG002335 | pfam02469                                             |           |  |  |  | 1 |   |   |   |
| arCG003199                              | M | Cell wall/membrane/envelope biogenesis                     | AgfH/RfaE | UDP-N-acetylmuramyl pentapeptide phosphotransferase/UDP-N-acetylgluco        | CG000472 | pfam00953                                             | TIGR04045 |  |  |  | 1 |   |   |   |
| arCG002820                              | M | Cell wall/membrane/envelope biogenesis                     | MurE      | UDP-N-acetylmuramyl tripeptide synthase                                      | CG000769 | pfam08245, pfam02875                                  | TIGR01082 |  |  |  | 1 |   |   |   |
| arCG004827                              | M | Cell wall/membrane/envelope biogenesis                     | TagB      | Glycosylglycerophosphate transferase involved in teichoic acid biosynthesis  | CG001887 | pfam04464                                             |           |  |  |  | 1 |   |   |   |
| arCG001369                              | M | Cell wall/membrane/envelope biogenesis                     | WecA      | Nucleoside-diphosphate-sugar epimerase                                       | CG000451 | pfam01370                                             | TIGR01179 |  |  |  | 1 | 2 | 4 |   |
| arCG001392                              | M | Cell wall/membrane/envelope biogenesis                     | WecB      | UDP-N-acetylglucosamine-2-epimerase                                          | CG000381 | pfam01350                                             | TIGR00236 |  |  |  | 1 |   |   |   |
| arCG004048                              | M | Cell wall/membrane/envelope biogenesis                     | -         | Cell surface protein, a component of a putative secretion system             | CG000463 | pfam00535                                             |           |  |  |  | 1 |   | 1 | 1 |
| arCG001385                              | M | Cell wall/membrane/envelope biogenesis                     | -         | Glycosyl transferase family 2                                                | CG000463 | pfam00535                                             | TIGR04283 |  |  |  |   |   | 1 | 2 |
| arCG002532                              | M | Cell wall/membrane/envelope biogenesis                     | -         | Secreted Beta-proteobacter repeat protein fused to CARDB-like adhesion modul | CG003291 | pfam07705                                             | TIGR04213 |  |  |  | 1 | 2 | 2 |   |
| arCG007560                              | M | Cell wall/membrane/envelope biogenesis                     | -         | Cell surface protein                                                         | -        |                                                       |           |  |  |  | 1 | 1 | 1 |   |
| arCG000895                              | M | Cell wall/membrane/envelope biogenesis                     | -         | Glycosyl transferase family 2                                                | CG000463 | pfam00535                                             | TIGR04182 |  |  |  |   |   | 1 | 1 |
| arCG002487                              | M | Cell wall/membrane/envelope biogenesis                     | -         | Cell surface protein, a component of a putative secretion system             | CG002369 |                                                       |           |  |  |  |   |   | 1 | 1 |
| arCG002538                              | M | Cell wall/membrane/envelope biogenesis                     | -         | Secreted protein, with PKD repeat domain                                     | CG003291 |                                                       |           |  |  |  |   |   | 1 | 1 |
| arCG000896                              | M | Cell wall/membrane/envelope biogenesis                     | AgfA      | Glycosyltransferase family 2                                                 | CG000463 | pfam00535                                             | TIGR04182 |  |  |  |   |   | 1 | 1 |
| arCG003365                              | M | Cell wall/membrane/envelope biogenesis                     | AgfB      | Glycosyltransferase family 2                                                 | CG001287 | pfam02516, pfam13620, pfam1                           | TIGR01514 |  |  |  | 1 | 1 | 1 |   |
| arCG000664                              | M | Cell wall/membrane/envelope biogenesis                     | AgfL/RfaE | Glucose-3-phosphate uridylyltransferase                                      | CG001209 | pfam00483                                             | TIGR03992 |  |  |  |   |   | 1 | 2 |
| arCG002553                              | M | Cell wall/membrane/envelope biogenesis                     | AgfM/RfaE | UDP-glucose 6-dehydrogenase                                                  | CG001004 | pfam03721, pfam00984, pfam0                           | TIGR03026 |  |  |  |   |   | 1 | 1 |
| arCG001381                              | M | Cell wall/membrane/envelope biogenesis                     | AgfO      | Glycosyl transferase family 2                                                | CG000463 | pfam00535                                             | TIGR04283 |  |  |  |   |   | 1 | 1 |
| arCG000663                              | M | Cell wall/membrane/envelope biogenesis                     | GCD1      | Nucleoside-diphosphate-sugar pyrophosphorylase involved in lipopolysaccha    | CG001208 | pfam00483                                             | TIGR03992 |  |  |  | 1 |   |   |   |
| arCG000057                              | M | Cell wall/membrane/envelope biogenesis                     | GlmD      | Glucosamine-6-phosphate synthetase                                           | CG000449 | pfam03110, pfam00714, cd0056                          | TIGR01135 |  |  |  | 1 |   | 1 | 1 |
| arCG001373                              | M | Cell wall/membrane/envelope biogenesis                     | GlmS      | UDP-D-mannose dehydrogenase                                                  | CG001089 | pfam01370, pfam005266                                 | TIGR01472 |  |  |  |   |   | 1 | 1 |
| arCG002013                              | M | Cell wall/membrane/envelope biogenesis                     | LoiE      | ABC-type transport system, involved in lipoprotein release, permease compo   | CG004591 | pfam1270, pfam02687                                   |           |  |  |  |   |   |   |   |
| arCG002821                              | M | Cell wall/membrane/envelope biogenesis                     | MurD      | UDP-N-acetylmuramylalanine-D-glutamate ligase                                | CG000771 | pfam08245, pfam02875                                  | TIGR01082 |  |  |  | 1 |   |   |   |
| arCG007536                              | M | Cell wall/membrane/envelope biogenesis                     | NanM      | N-acetylneuraminic acid mutarotase                                           | CG003055 |                                                       |           |  |  |  |   |   | 1 | 1 |
| arCG001405                              | M | Cell wall/membrane/envelope biogenesis                     | RfaG      | Glycosyltransferase                                                          | CG000438 | pfam13439, pfam03794                                  | TIGR04063 |  |  |  |   |   | 1 | 1 |
| arCG004049                              | M | Cell wall/membrane/envelope biogenesis                     | RfaG      | Glycosyltransferase                                                          | CG000438 | pfam13692                                             | TIGR03087 |  |  |  |   |   | 1 | 1 |
| arCG000194                              | V | Defense mechanisms                                         | CcmA      | ABC-type multidrug transport system, ATPase component                        | CG001131 | pfam00005                                             | TIGR01188 |  |  |  | 9 | 2 |   |   |
| arCG000786                              | V | Defense mechanisms                                         | CcmB      | CMPR-associated protein CcmB, RecB family exonuclease                        | CG001468 | pfam01800                                             | TIGR01042 |  |  |  | 5 | 1 |   |   |
| arCG000731                              | V | Defense mechanisms                                         | Norm      | NarX-driven multidrug efflux pump                                            | CG000534 | pfam01354, pfam013137                                 | TIGR00797 |  |  |  |   |   |   |   |

|                   |   |                                                              |       |                                                                                 |                      |                                       |                                 |   |   |   |   |   |
|-------------------|---|--------------------------------------------------------------|-------|---------------------------------------------------------------------------------|----------------------|---------------------------------------|---------------------------------|---|---|---|---|---|
| arCG001308        | O | Posttranslational modification, protein turnover, chaperones | Cdc48 | ATPase of the AAA+ class, CDC48 family                                          | CG00464              | pfam00004, pfam00009, cd00009, c00009 | TIGR01243                       |   |   |   | 3 | 1 |
| arCG001005        | O | Posttranslational modification, protein turnover, chaperones | csdA  | Selenocysteine lyase/Cysteine desulfurase                                       | CG00520              | pfam00266, pfam00266                  | TIGR01979                       |   |   |   |   |   |
| arCG000603        | O | Posttranslational modification, protein turnover, chaperones | ClaA  | Uncharacterized protein required for cytochrome oxidase assembly                | CG01612              | pfam02628                             |                                 | 1 |   |   |   | 1 |
| arCG004880        | O | Posttranslational modification, protein turnover, chaperones | DnaI  | DnaI-type Zn finger domain                                                      | CG00484              | pfam00484                             | TIGR02349                       |   |   |   | 3 | 1 |
| arCG002846        | O | Posttranslational modification, protein turnover, chaperones | DnaI  | DnaI-class molecular chaperone                                                  | CG00484              | pfam00226, pfam00226                  | TIGR02349                       |   |   |   |   | 1 |
| arCG004142        | O | Posttranslational modification, protein turnover, chaperones | DYS1  | Deoxyhypusine synthase                                                          | CG01899              | pfam01916                             | TIGR00321                       |   |   | 1 |   |   |
| arCG004712        | O | Posttranslational modification, protein turnover, chaperones | ECM4  | Predicted glutathione S-transferase                                             | CG00435              | pfam13409, pfam13409                  |                                 |   |   |   |   | 1 |
| arCG001341        | O | Posttranslational modification, protein turnover, chaperones | GIM5  | Predicted prefoldin, molecular chaperone implicated in de novo protein fold     | CG01730              | pfam02996, pfam02996                  | TIGR00293                       |   |   | 1 | 1 |   |
| arCG005154        | O | Posttranslational modification, protein turnover, chaperones | GroEL | Chaperonin GroEL (HSP60 family)                                                 | CG00459              | pfam00118, pfam00118                  | TIGR02348                       |   |   | 5 |   |   |
| arCG001257        | O | Posttranslational modification, protein turnover, chaperones | GroEL | Chaperonin GroEL, HSP60 family                                                  | CG00459              | pfam00118, pfam00118                  | TIGR02339                       |   |   |   |   | 7 |
| arCG004772        | O | Posttranslational modification, protein turnover, chaperones | GroEL | Molecular chaperone GroEL (heat shock protein)                                  | CG00459              | pfam00118, pfam00118                  | TIGR02339                       |   |   |   |   | 2 |
| arCG002066        | O | Posttranslational modification, protein turnover, chaperones | GroEL | Molecular chaperone GroEL (heat shock protein)                                  | CG00459              | pfam00118, pfam00118                  | TIGR02339                       |   |   |   |   | 1 |
| arCG002067        | O | Posttranslational modification, protein turnover, chaperones | GroEL | Molecular chaperone GroEL (heat shock protein)                                  | CG00459              | pfam00118, pfam00118                  | TIGR02339                       |   |   |   |   | 1 |
| arCG001915        | O | Posttranslational modification, protein turnover, chaperones | HIC   | Membrane protease subunit, stomatin/prohibitin homolog                          | CG00330              | pfam01145, pfam01145                  | TIGR01933                       |   |   |   |   | 1 |
| arCG002599        | O | Posttranslational modification, protein turnover, chaperones | IspA  | Zn-dependent amino- or carboxypeptidase, M28 family                             | CG00234              | pfam04389, pfam04389                  |                                 |   |   |   |   | 3 |
| arCG004560        | O | Posttranslational modification, protein turnover, chaperones | IscA  | Fe-S cluster assembly iron-binding protein IscA                                 | CG00316              | pfam01521, pfam01521                  | TIGR00049                       |   |   |   |   | 2 |
| arCG002443        | O | Posttranslational modification, protein turnover, chaperones | NcoY  | ABC-type transport system involved in multi-copper enzyme maturation, per       | CG01277              | pfam12679                             |                                 | 1 |   |   |   |   |
| arCG002438        | O | Posttranslational modification, protein turnover, chaperones | NcoY  | ABC-type transport system involved in multi-copper enzyme maturation, per       | CG01277              | pfam12679                             |                                 | 1 |   |   |   |   |
| arCG001846        | O | Posttranslational modification, protein turnover, chaperones | PsaD  | Metal-sulfur cluster biosynthetic enzyme                                        | CG02151              | pfam01883, pfam01883                  | TIGR02945, TIGR01969            |   |   | 2 |   |   |
| arCG000976        | O | Posttranslational modification, protein turnover, chaperones | Pcm   | Protein-L-isoaspartate carboxymethyltransferase                                 | CG00258              | pfam01135, pfam01135                  | TIGR00080                       |   |   |   | 1 | 1 |
| arCG005850        | O | Posttranslational modification, protein turnover, chaperones | Pcp   | Pyroglutamate-carboxylate peptidase (N-terminal pyroglutamate peptidase)        | CG00209              | pfam01470, pfam01470                  | TIGR00504                       |   |   |   |   | 1 |
| arCG004767        | O | Posttranslational modification, protein turnover, chaperones | PpiB  | Peptidyl-prolyl cis-trans isomerase (rotamase) - cyclophilin family             | CG00652              | pfam00578, pfam00578                  |                                 |   |   |   | 1 | 1 |
| arCG001306        | O | Posttranslational modification, protein turnover, chaperones | RPT1  | ATP-dependent 26S proteasome regulatory subunit                                 | CG01222              | pfam00004, pfam00009                  | TIGR01242                       |   |   |   |   |   |
| arCG000609        | O | Posttranslational modification, protein turnover, chaperones | RspA  | Membrane-associated protease RspA, regulator of RpoH activity in bacteria       | CG00750              | pfam02183, pfam02183                  |                                 | 1 |   |   |   |   |
| arCG004064        | O | Posttranslational modification, protein turnover, chaperones | RspA  | Membrane-associated protease RspA, regulator of RpoH activity in bacteria       | CG00750              | pfam02183, pfam02183                  | TIGR00054                       |   |   |   |   |   |
| arCG000981        | O | Posttranslational modification, protein turnover, chaperones | SjlpA | FKBP-type peptidyl-prolyl cis-trans isomerase 2                                 | CG01047              | pfam00254, pfam00254                  | TIGR00115                       |   |   | 2 |   |   |
| arCG000980        | O | Posttranslational modification, protein turnover, chaperones | SjlpA | FKBP-type peptidyl-prolyl cis-trans isomerase 2                                 | CG01047              | pfam00254, pfam00254                  | TIGR00115                       |   |   |   | 1 | 1 |
| arCG002784        | O | Posttranslational modification, protein turnover, chaperones | SRAP  | Putative SOS response-associated peptidase YedK                                 | CG00215              | pfam02586                             |                                 |   |   |   |   | 1 |
| arCG003580        | O | Posttranslational modification, protein turnover, chaperones | STE14 | Putative protein-5-isoprenylcysteine methyltransferase                          | CG00200              | pfam04191, pfam04191                  |                                 | 2 |   |   |   |   |
| arCG001715        | O | Posttranslational modification, protein turnover, chaperones | SufB  | Cysteine desulfurase activator SufB                                             | CG00719              | pfam01458                             | TIGR01981                       |   |   | 3 | 1 |   |
| arCG004741        | O | Posttranslational modification, protein turnover, chaperones | SufB  | Parvulin-like peptidyl-prolyl isomerase                                         | CG00740              | pfam00639                             | TIGR02933                       |   |   |   |   | 1 |
| arCG000021        | O | Posttranslational modification, protein turnover, chaperones | TldD  | Zn-dependent protease, component of TldD/TldE system                            | CG00312              | pfam01531, pfam01531                  |                                 |   |   |   |   | 1 |
| arCG000022        | O | Posttranslational modification, protein turnover, chaperones | TldE  | Inactivated Zn-dependent protease, component of TldD/TldE system                | CG00312              | pfam01531, pfam01531                  |                                 |   |   |   |   | 1 |
| arCG006181        | O | Posttranslational modification, protein turnover, chaperones | TrxA  | Thiol-disulfide isomerase or thioredoxin                                        | CG00526              | pfam00578, pfam00578                  |                                 | 3 | 1 |   |   | 1 |
| arCG001972        | O | Posttranslational modification, protein turnover, chaperones | TrxA  | Thiol-disulfide isomerase or thioredoxin                                        | CG00526              | pfam00578, pfam00578                  |                                 | 1 |   |   |   |   |
| arCG001929        | O | Posttranslational modification, protein turnover, chaperones | XdhC  | Xanthine and CO dehydrogenase maturation factor, XdhC/CoxF family               | CG01975              | pfam13478                             |                                 |   |   |   |   |   |
| arCG002985        | T | Signal transduction mechanisms                               | -     | Membrane proteinase of CAAX superfamily, regulator of anti-sigma factor         | CG02339              | pfam13367                             |                                 |   |   | 3 | 1 | 1 |
| arCG002967        | T | Signal transduction mechanisms                               | -     | NACHT family NTPase fused to HEAT repeats domain                                | CG05635              | pfam13646, pfam13646                  |                                 | 3 |   |   |   | 1 |
| arCG001480        | T | Signal transduction mechanisms                               | ROG1  | Series/threonine protein kinase involved in cell cycle control                  | CG01718              | pfam01163, pfam01163                  | TIGR03724                       |   |   |   |   | 1 |
| arCG004820        | T | Signal transduction mechanisms                               | -     | SQHL helix-binding protein                                                      | CG01482              | pfam04832                             |                                 |   |   |   |   | 2 |
| arCG006193        | T | Signal transduction mechanisms                               | -     | Signal transduction histidine kinase and PAS domains                            | CG00642              | pfam13426, pfam13426                  | TIGR00229, TIGR00229, TIGR01386 |   |   | 2 |   |   |
| arCG004425        | T | Signal transduction mechanisms                               | Wzb   | Protein-tyrosine-phosphatase                                                    | CG00394              | pfam01451, pfam01451                  | TIGR02689                       |   |   | 1 |   |   |
| arCG005374        | T | Signal transduction mechanisms                               | -     | GAF domain-containing protein                                                   | CG01956              | pfam13185                             |                                 | 1 |   |   | 1 |   |
| arCG001171        | T | Signal transduction mechanisms                               | RAD55 | RecA-superfamily ATPase implicated in signal transduction                       | CG00467              | pfam06745, pfam06745                  | TIGR03877                       |   |   |   |   | 2 |
| arCG004453        | T | Signal transduction mechanisms                               | DiA_N | Diadenylate cyclase (G-di-AMP synthetase), DiA_N domain                         | CG01624              | pfam02457                             |                                 |   |   |   |   | 1 |
| arCG003993        | T | Signal transduction mechanisms                               | DiA_C | Diadenylate cyclase (G-di-AMP synthetase), DiA_C domain                         | CG01624              | pfam02457                             |                                 |   |   |   |   | 2 |
| arCG001143        | T | Signal transduction mechanisms                               | ApA   | Series/threonine protein phosphatase PF2A family                                | CG00639              | pfam00149                             | TIGR00149                       |   |   |   |   | 1 |
| arCG002391        | T | Signal transduction mechanisms                               | CheY  | Rec domain                                                                      | CG00784              | pfam00072, pfam00072                  | TIGR02154                       |   |   |   |   | 3 |
| arCG003413        | T | Signal transduction mechanisms                               | CDC14 | Protein-tyrosine phosphatase                                                    | CG002453             | pfam00782, pfam00782                  |                                 |   |   |   |   | 1 |
| arCG003517        | T | Signal transduction mechanisms                               | -     | Formylglycine-generating sulfatase enzyme                                       | CG01262              | pfam12867, pfam12867                  | TIGR03440                       |   |   |   |   | 1 |
| arCG001992        | T | Signal transduction mechanisms                               | SixA  | Phosphohistidine phosphatase SixA                                               | CG00262              | pfam00300, pfam00300                  | TIGR00249                       |   |   |   |   |   |
| arCG006801        | T | Signal transduction mechanisms                               | SrkA  | Ser/Thr protein kinase RhoA involved in Cpx stress response, MafA antagonist    | CG02334              | pfam01636, pfam01636                  |                                 |   |   |   |   | 3 |
| <b>METABOLISM</b> |   |                                                              |       |                                                                                 |                      |                                       |                                 |   |   |   |   |   |
| arCG002767        | E | Amino acid transport and metabolism                          | -     | Metal-dependent membrane protease, CAAX family                                  | CG01266              | pfam02517                             |                                 |   |   | 3 |   |   |
| arCG003600        | E | Amino acid transport and metabolism                          | -     | Transglutaminase-like cysteine protease                                         | CG01305              |                                       |                                 |   |   | 2 |   |   |
| arCG014875        | E | Amino acid transport and metabolism                          | -     | Aspartyl protease                                                               | pfam05618            |                                       |                                 |   |   | 2 |   | 1 |
| arCG003611        | E | Amino acid transport and metabolism                          | -     | Peptidase C1A subfamily                                                         | cd08546, cd14254     |                                       |                                 |   |   | 2 |   | 2 |
| arCG007760        | E | Amino acid transport and metabolism                          | -     | Peptidase family C25                                                            | pfam01364, pfam01364 |                                       |                                 |   |   | 1 |   |   |
| arCG004333        | E | Amino acid transport and metabolism                          | -     | Aspartate/tyrosine/aromatic aminotransferase                                    | CG00436              | pfam00155, pfam00155                  | TIGR03947                       |   |   |   | 1 |   |
| arCG001130        | E | Amino acid transport and metabolism                          | -     | Aspartate/tyrosine/aromatic aminotransferase                                    | CG00436              | pfam00155, pfam00155                  | TIGR03540                       |   |   |   | 2 |   |
| arCG002165        | E | Amino acid transport and metabolism                          | -     | Transglutaminase-like cysteine protease                                         | CG01305              | pfam01841                             |                                 |   |   |   |   | 1 |
| arCG001131        | E | Amino acid transport and metabolism                          | -     | Aspartate/tyrosine/aromatic aminotransferase                                    | CG00436              | pfam00155, pfam00155                  | TIGR01265                       |   |   |   |   | 1 |
| arCG004044        | E | Amino acid transport and metabolism                          | -     | 2-amino-3,7-dideoxy-D-threo-6-ulonic acid synthase, Dhna-aldolase               | CG01830              | pfam01791, pfam01791                  | TIGR01949                       |   |   |   | 2 | 1 |
| arCG001888        | E | Amino acid transport and metabolism                          | AmpS  | Leucyl aminopeptidase (aminopeptidase T)                                        | CG00309              | pfam02073                             |                                 |   |   | 2 |   |   |
| arCG001890        | E | Amino acid transport and metabolism                          | AmpS  | Leucyl aminopeptidase (aminopeptidase T)                                        | CG00309              | pfam02073                             |                                 |   |   | 2 |   |   |
| arCG001524        | E | Amino acid transport and metabolism                          | AnaB  | L-asparaginase/lysine/arginine aminotransferase subunit D                       | CG00252              | pfam00710, pfam00710                  | TIGR02153                       |   |   |   |   |   |
| arCG002663        | E | Amino acid transport and metabolism                          | ArgC  | Arginase-like protein (glutamine-hydrolyzing)                                   | CG00687              | pfam00549                             | TIGR00746                       |   |   |   |   | 2 |
| arCG001107        | E | Amino acid transport and metabolism                          | ArgF  | Acetylornithine decarboxylase/Succinyl-CoA:ornithine decarboxylase or related   | CG00624              | pfam01546, pfam01546                  | TIGR01910                       |   |   |   | 1 | 1 |
| arCG000912        | E | Amino acid transport and metabolism                          | ArgF  | Ornithine carbamoyltransferase                                                  | CG00078              | pfam02729, pfam02729                  | TIGR00658                       |   |   | 3 |   | 1 |
| arCG004134        | E | Amino acid transport and metabolism                          | AroA  | 5-enolpyruvylshikimate 3-phosphate synthase                                     | CG00128              | pfam00275, pfam00275                  | TIGR01356                       |   |   |   | 1 | 1 |
| arCG001033        | E | Amino acid transport and metabolism                          | AroE  | Shikimate 5-dehydrogenase                                                       | CG00169              | pfam08501, pfam08501                  | TIGR00507                       |   |   |   |   |   |
| arCG001025        | E | Amino acid transport and metabolism                          | AroK2 | Archeal shikimate kinase                                                        | CG01685              | pfam00288                             | TIGR01920                       |   |   |   | 2 | 1 |
| arCG000494        | E | Amino acid transport and metabolism                          | Asd   | Aspartate-semialdehyde dehydrogenase                                            | CG00316              | pfam01118, pfam01118                  | TIGR00978                       |   |   |   |   | 1 |
| arCG001121        | E | Amino acid transport and metabolism                          | AsnB  | Asparagine synthase (glutamine-hydrolyzing)                                     | CG00367              | pfam00773, pfam00773                  | TIGR01536                       |   |   | 1 |   |   |
| arCG000071        | E | Amino acid transport and metabolism                          | AsnB  | Asparagine synthase (glutamine-hydrolyzing)                                     | CG00367              | pfam00773, pfam00773                  | TIGR01536                       |   |   | 1 |   | 2 |
| arCG001594        | E | Amino acid transport and metabolism                          | CarB  | Carbamoylphosphate synthase large subunit                                       | CG00458              | pfam00289, pfam00289                  | TIGR01369                       |   |   | 1 |   |   |
| arCG000073        | E | Amino acid transport and metabolism                          | CysH  | PAPS reductase related enzyme fused to RNA-binding PUA domain and ferredoxin    | CG00175              | pfam01507, pfam01507                  | TIGR00434                       |   |   |   | 2 |   |
| arCG001430        | E | Amino acid transport and metabolism                          | CysK  | Cysteine synthase                                                               | CG00031              | pfam00291, pfam00291                  | TIGR01136                       |   |   | 1 | 1 | 1 |
| arCG000755        | E | Amino acid transport and metabolism                          | DadA  | Glycine/D-amino acid oxidase (deaminating)                                      | CG00665              | pfam01266                             |                                 | 2 |   |   | 2 |   |
| arCG001646        | E | Amino acid transport and metabolism                          | DAP2  | Dipeptidyl aminopeptidase/acylaminoacyl-peptidase                               | CG01506              | pfam07859, pfam07859                  |                                 | 8 | 1 |   |   |   |
| arCG001109        | E | Amino acid transport and metabolism                          | DdAH  | D-ornithine decarboxylase/diaminoputrescine decarboxylase                       | CG00184              | pfam02274                             | TIGR01078                       |   |   |   | 1 | 2 |
| arCG005395        | E | Amino acid transport and metabolism                          | Dld   | Formiminotetrahydrofolate cyclodeaminase                                        | CG03404              |                                       |                                 |   |   |   |   |   |
| arCG000915        | E | Amino acid transport and metabolism                          | GabT  | 4-aminobutyrate aminotransferase or related aminotransferase                    | CG00160              | pfam00202, pfam00202                  | TIGR00707                       |   |   | 1 |   |   |
| arCG001303        | E | Amino acid transport and metabolism                          | GcvH  | Glycine cleavage system H protein (lipoate-binding)                             | CG00509              | pfam01597, pfam01597                  | TIGR00527                       |   |   |   | 1 | 1 |
| arCG000756        | E | Amino acid transport and metabolism                          | GcvT  | Glycine cleavage system T protein (aminomethyltransferase)                      | CG00404              | pfam01571, pfam01571                  | TIGR00528                       |   |   |   |   | 1 |
| arCG000757        | E | Amino acid transport and metabolism                          | GcvT  | Glycine cleavage system T protein (aminomethyltransferase)                      | CG00404              | pfam01571, pfam01571                  | TIGR00528                       |   |   |   | 2 |   |
| arCG002706        | E | Amino acid transport and metabolism                          | GloA  | Lactoylglutathione lyase or related enzyme                                      | CG00346              | pfam13669, pfam13669                  | TIGR03081                       |   |   | 1 |   |   |
| arCG000495        | E | Amino acid transport and metabolism                          | GIB   | Glutamate synthase domain 3                                                     | CG00087              | pfam00310, pfam00310                  | TIGR01124                       |   |   |   |   |   |
| arCG000096        | E | Amino acid transport and metabolism                          | GIB   | Glutamate synthase domain 3                                                     | CG00070              | pfam01493, pfam01493                  | TIGR01122                       |   |   | 1 |   |   |
| arCG000619        | E | Amino acid transport and metabolism                          | GIB   | Glutamate synthase domain 2 and ferredoxin domain                               | CG00069              | pfam01645, pfam01645                  |                                 |   |   |   |   |   |
| arCG007384        | E | Amino acid transport and metabolism                          | HisB  | Histidinol phosphatase or related phosphatase                                   | CG00241              | pfam13242, pfam13242                  | TIGR01656                       |   |   |   |   | 1 |
| arCG004273        | E | Amino acid transport and metabolism                          | HicC  | Histidinol-phosphate/aromatic aminotransferase or cobryic acid decarboxylase    | CG00079              | pfam01555, pfam01555                  | TIGR01140                       |   |   |   |   |   |
| arCG001799        | E | Amino acid transport and metabolism                          | Hij   | ABC-type amino acid transport/signal transduction system, periplasmic component | CG00834              | pfam00497, pfam00497                  | TIGR01096                       |   |   |   |   |   |
| arCG001798        | E | Amino acid transport and metabolism                          | HsmA  | ABC-type amino acid transport system, permease component                        | CG00765              | pfam00528, pfam00528                  | TIGR03003                       |   |   |   |   |   |
| arCG004671        | E | Amino acid transport and metabolism                          | HuH   | Histidine aminomethyltransferase                                                | CG00286              | pfam00221, pfam00221                  | TIGR01225                       |   |   |   |   | 2 |
| arCG004670        | E | Amino acid transport and metabolism                          | HuH   | Histidine aminomethyltransferase                                                | CG00286              | pfam00221, pfam00221                  | TIGR01225                       |   |   |   |   |   |
| arCG001512        | E | Amino acid transport and metabolism                          | HuH   | Histidine aminomethyltransferase                                                | CG00286              | pfam00221, pfam00221                  | TIGR01225                       |   |   |   | 5 |   |
| arCG004779        | E | Amino acid transport and metabolism                          | IaaA  | Isoaspartyl peptidase or L-asparaginase, Ntn-hydrolase superfamily              | CG01446              | pfam01112, pfam01112                  |                                 |   |   |   | 1 |   |
| arCG002297        | E | Amino acid transport and metabolism                          | IleE  | Branched-chain amino acid aminotransferase/4-amino-4-deoxychorismate lyase      | CG00115              | pfam01063, pfam01063                  | TIGR01122                       |   |   | 3 |   | 1 |
| arCG001698        | E | Amino acid transport and metabolism                          | IleU  | Homocysteine hydrolase/3-isopropylmalate dehydratase large subunit family       | CG00065              | pfam00330, pfam00330                  | TIGR02086                       |   |   |   |   |   |
| arCG001021        | E | Amino acid transport and metabolism                          | LikK  | ABC-type branched-chain amino acid transport system, periplasmic component      | CG00683              | pfam13458, pfam13458                  |                                 |   |   |   |   |   |
| arCG000043        | E | Amino acid transport and metabolism                          | LysB  | ε-N-acetyllysine dehydrogenase or related enzyme                                | CG00174              | pfam03435</                           |                                 |   |   |   |   |   |

|             |   |                                        |         |                                                                                              |           |                                            |                                            |   |   |   |   |   |   |
|-------------|---|----------------------------------------|---------|----------------------------------------------------------------------------------------------|-----------|--------------------------------------------|--------------------------------------------|---|---|---|---|---|---|
| arCG004120  | G | Carbohydrate transport and metabolism  | PyKf    | Pyruvate kinase                                                                              | CG00469   | pfam00224, pfam00288                       | TIGR01064                                  |   |   |   |   |   | 1 |
| arCG005061  | G | Carbohydrate transport and metabolism  | TalA    | Transaldolase                                                                                | CG00176   | pfam00923, c000956                         | TIGR00875                                  |   |   |   |   |   | 1 |
| arCG005412  | G | Carbohydrate transport and metabolism  | BglB    | Beta-glucosidase/6-phospho-beta-glucosidase/beta-galactosidase                               | CG00273   | pfam00232                                  | TIGR03356                                  |   |   |   |   |   | 1 |
| arCG004339  | G | Carbohydrate transport and metabolism  | TagD    | ABC-type polyphosphate/ATP phosphatase export system, permease component                     | CG00182   | pfam01081                                  |                                            | 1 |   |   |   |   | 1 |
| arCG004263  | H | Coenzyme transport and metabolism      | -       | Pantoate kinase                                                                              | CG01829   | pfam02088                                  |                                            | 4 |   |   |   |   | 1 |
| arCG000021  | H | Coenzyme transport and metabolism      | -       | Predicted transcriptional regulator fused phosphomethylpyrimidine kinase, NADH dehydrogenase | CG01992   | pfam10120                                  |                                            | 4 |   |   |   |   | 1 |
| arCG001484  | H | Coenzyme transport and metabolism      | RibD    | Pyrimidine reductase, riboflavin biosynthesis                                                | CG01985   | pfam01872                                  | TIGR01508                                  |   | 3 | 1 | 1 |   | 1 |
| arCG001940  | H | Coenzyme transport and metabolism      | BirA    | Biotin-(acetyl-CoA carboxylase) ligase                                                       | CG00340   | pfam03099                                  | TIGR00121                                  |   | 3 | 1 | 1 | 2 |   |
| arCG000040  | H | Coenzyme transport and metabolism      | Hpt1    | Hydroxanthine phosphoribosyltransferase                                                      | CG00236   | pfam00156, c006223                         | TIGR01251                                  |   | 3 | 1 | 1 |   |   |
| arCG002172  | H | Coenzyme transport and metabolism      | QueD    | 6-pyruvoyl-tetrahydropterin synthase                                                         | CG00720   | pfam01242, c000470                         | TIGR03367                                  |   | 3 |   |   |   |   |
| arCG001045  | H | Coenzyme transport and metabolism      | CoqE    | Coenzyme Q-CoA kinase                                                                        | CG00037   | pfam00237                                  |                                            | 3 |   |   |   | 1 | 1 |
| arCG002026  | H | Coenzyme transport and metabolism      | ThpA    | ABC-type thiamine transport system, periplasmic component                                    | CG00413   | pfam13343, c013545                         | TIGR01254                                  |   | 2 |   |   |   | 1 |
| arCG001589  | H | Coenzyme transport and metabolism      | RimK    | Glutathione synthase/glutaminyl transferase/alpha-L-glutamate ligase                         | CG00189   | pfam08843                                  | TIGR02144                                  |   | 2 |   |   |   |   |
| arCG003402  | H | Coenzyme transport and metabolism      | MbtC1   | Methanogenic corrinoid protein MbtC1                                                         | CG005012  | pfam02607, pfam02065                       | TIGR02370                                  |   | 2 |   |   |   |   |
| arCG0040476 | H | Coenzyme transport and metabolism      | UbiA    | 4-hydroxybenzoate poly(prenyl)transferase or related prenyltransferase                       | CG00382   | pfam01040, c013961                         | TIGR01476                                  |   | 1 |   |   |   | 1 |
| arCG000972  | H | Coenzyme transport and metabolism      | NadR    | Nicotinamide mononucleotide adenyltransferase                                                | CG01056   | pfam01467, c002166                         | TIGR01527                                  |   | 1 | 1 | 1 | 1 | 1 |
| arCG004139  | H | Coenzyme transport and metabolism      | ApbA    | Ketopantoate reductase                                                                       | CG01893   | pfam02558, pfam08546                       | TIGR00745                                  |   | 1 | 1 | 1 |   |   |
| arCG001522  | H | Coenzyme transport and metabolism      | HemY    | Protoporphyrinogen oxidase                                                                   | CG00232   | pfam01593                                  | TIGR00562                                  |   | 1 | 1 |   |   |   |
| arCG001490  | H | Coenzyme transport and metabolism      | RaIA    | Dihydrofolate reductase                                                                      | CG00262   | pfam01036, c002009                         |                                            |   |   |   |   | 1 |   |
| arCG001223  | H | Coenzyme transport and metabolism      | CAB4    | Phosphopantetheine adenyltransferase                                                         | CG00109   | pfam01467, c002164                         | TIGR00125                                  |   | 1 | 1 | 1 | 1 |   |
| arCG001320  | H | Coenzyme transport and metabolism      | RibB    | 3,4-dihydroxy-2-butanone 4-phosphate synthase                                                | CG00108   | pfam00926                                  | TIGR00506                                  |   | 1 |   |   |   |   |
| arCG001671  | H | Coenzyme transport and metabolism      | UbiD    | 3-poly(prenyl)-4-hydroxybenzoate decarboxylase or related decarboxylase                      | CG00043   | pfam01977, c000488                         | TIGR03701                                  |   | 3 | 1 |   |   |   |
| arCG002939  | H | Coenzyme transport and metabolism      | PHHb    | Pterin-4-carbinolamine dehydratase                                                           | CG00214   | pfam01329, c000488                         |                                            |   | 3 | 1 |   |   |   |
| arCG001482  | H | Coenzyme transport and metabolism      | NadC    | Nicotinate-nucleotide pyrophosphorylase                                                      | CG00157   | pfam02749, pfam001572                      | TIGR00078                                  |   |   |   |   |   |   |
| arCG004137  | H | Coenzyme transport and metabolism      | SamA    | 5-adenosylhomocysteine hydrolase                                                             | CG00499   | pfam05221, c000401                         | TIGR00936                                  |   | 1 |   |   |   |   |
| arCG003838  | H | Coenzyme transport and metabolism      | PgxD    | Coenzyme Q10 synthesis protein D                                                             | pfam05402 |                                            |                                            | 1 |   |   |   | 1 |   |
| arCG000069  | H | Coenzyme transport and metabolism      | NadE    | NH3-dependent NAD+ synthetase                                                                | CG00171   | pfam02540, c000553                         | TIGR00552                                  |   | 3 | 1 |   |   |   |
| arCG001942  | H | Coenzyme transport and metabolism      | LipB    | Lipoate-protein ligase B                                                                     | CG00321   | pfam03099                                  | TIGR00214                                  |   | 1 |   |   |   |   |
| arCG0040480 | H | Coenzyme transport and metabolism      | MenA    | 1,4-dihydroxy-2-naphthoate octaprenyltransferase                                             | CG001575  | pfam01040, c013962                         | TIGR02335                                  |   |   |   | 1 |   |   |
| arCG0040489 | H | Coenzyme transport and metabolism      | PduO    | Cob(II)lamina adenosyltransferase                                                            | CG00296   | pfam01923                                  | TIGR00636                                  |   |   |   |   | 1 |   |
| arCG002817  | H | Coenzyme transport and metabolism      | FolC    | Folylpolyglutamate synthetase and Dihydropteroate synthase                                   | CG00285   | pfam02475, pfam00739                       | TIGR01499, TIGR01496                       |   |   |   |   | 1 |   |
| arCG001704  | H | Coenzyme transport and metabolism      | Dfr     | Succinate dehydrogenase/fumarate reductase, flavoprotein subunit                             | CG00452   | pfam02441, pfam01217                       | TIGR01378, TIGR01812                       |   | 1 |   | 2 | 1 |   |
| arCG002014  | H | Coenzyme transport and metabolism      | MoaB    | Molybdopterin biosynthesis enzyme                                                            | CG00521   | pfam00994, c000886                         | TIGR02667                                  |   |   |   |   | 1 |   |
| arCG000534  | H | Coenzyme transport and metabolism      | MoaE    | Molybdopterin converting factor, large subunit                                               | CG00314   | pfam02391, c000756                         |                                            |   |   |   |   |   |   |
| arCG000930  | H | Coenzyme transport and metabolism      | MoaA    | Molybdenum cofactor biosynthesis enzyme                                                      | CG002896  | pfam04055, pfam01335                       | TIGR02668                                  |   |   |   | 1 | 1 |   |
| arCG001530  | H | Coenzyme transport and metabolism      | MoaC    | Molybdenum cofactor biosynthesis enzyme                                                      | CG00315   | pfam01967, c001419                         | TIGR00581                                  |   |   |   | 1 |   |   |
| arCG001872  | H | Coenzyme transport and metabolism      | MoaB    | Molybdopterin-guanine dinucleotide biosynthesis protein A                                    | CG00746   | pfam12804, c002503                         |                                            |   |   |   | 2 |   |   |
| arCG002017  | H | Coenzyme transport and metabolism      | MoaE    | Molybdopterin biosynthesis enzyme                                                            | CG00303   | pfam03453, pfam00887                       | TIGR01177                                  |   |   |   | 1 | 3 |   |
| arCG002189  | H | Coenzyme transport and metabolism      | McrT    | NAD(P)H:flavin reductase                                                                     | CG00043   | pfam00899, pfam00757                       | TIGR02356                                  |   |   |   |   | 2 | 1 |
| arCG001676  | H | Coenzyme transport and metabolism      | ThiF    | Thioester-lytic enzyme involved in molybdopterin and thiamine biosynthesis                   | CG00268   | pfam12804, c004182                         | TIGR03310                                  |   |   |   |   | 1 | 1 |
| arCG001873  | H | Coenzyme transport and metabolism      | MoaB    | GT-A family glycoyltransferase involved in molybdopterin guanine dinucleotide biosynthesis   | CG00226   | pfam08241                                  | TIGR01934                                  |   |   |   |   | 1 | 1 |
| arCG004348  | H | Coenzyme transport and metabolism      | UbiE    | Ubiquinone/menaquinone biosynthesis C-methylase UbiE                                         | CG00029   | pfam00890, pfam02910                       | TIGR00551                                  |   |   |   | 1 |   |   |
| arCG000572  | H | Coenzyme transport and metabolism      | NadB    | Aspartate oxidase                                                                            | CG001541  |                                            | TIGR02034                                  |   |   |   |   |   | 1 |
| arCG002624  | H | Coenzyme transport and metabolism      | Paak    | Coenzyme F390 synthetase                                                                     | CG001541  |                                            | TIGR02034                                  |   |   |   |   |   | 1 |
| arCG005070  | C | Energy production and conversion       | FncC    | Dehydrogenase (flavoprotein)                                                                 | CG00644   | pfam13450                                  | TIGR02032                                  |   | 6 | 2 |   | 2 | 1 |
| arCG002692  | C | Energy production and conversion       | PetE    | Plastocyanin                                                                                 | CG003794  | pfam00127, c013921                         | TIGR02657                                  |   |   |   |   |   |   |
| arCG002038  | C | Energy production and conversion       | CcdA    | Cytochrome c biogenesis protein                                                              | CG00785   | pfam02683                                  |                                            |   |   |   |   | 1 | 1 |
| arCG001599  | C | Energy production and conversion       | PorB    | Pyruvate:ferredoxin oxidoreductase or related 2-oxoacid:ferredoxin oxidoreductase            | CG001013  | pfam02775, pfam003375                      | TIGR02177                                  |   |   |   |   |   |   |
| arCG002071  | C | Energy production and conversion       | SdhA    | Succinate dehydrogenase/fumarate reductase, flavoprotein subunit                             | CG001053  | pfam02686, pfam02910                       | TIGR01378, TIGR01812                       |   | 1 |   |   | 4 | 1 |
| arCG001551  | C | Energy production and conversion       | NuoC    | NADH dehydrogenase subunit C                                                                 | CG000852  | pfam00329                                  | TIGR01961                                  |   |   |   |   | 3 | 1 |
| arCG001539  | C | Energy production and conversion       | NuoL    | NADH dehydrogenase subunit L                                                                 | CG001009  | pfam00662, pfam00361                       | TIGR01974                                  |   |   |   |   |   |   |
| arCG001540  | C | Energy production and conversion       | NuoN    | NADH dehydrogenase subunit N                                                                 | CG001007  | pfam00361                                  | TIGR01770                                  |   |   |   | 1 |   |   |
| arCG002095  | C | Energy production and conversion       | OxaA1   | Pyruvate/oxaloacetate carboxyltransferase                                                    | CG005016  | pfam00682, pfam007937                      | TIGR01108                                  |   |   |   | 1 | 1 | 1 |
| arCG004138  | C | Energy production and conversion       | NtpI    | Archaeal/vacuolar-type H+-ATPase subunit I                                                   | CG001269  | pfam01496                                  |                                            |   |   |   |   | 1 |   |
| arCG000869  | C | Energy production and conversion       | NtpE    | Archaeal/vacuolar-type H+-ATPase subunit E                                                   | CG001390  |                                            |                                            |   |   |   | 1 | 1 | 1 |
| arCG001054  | C | Energy production and conversion       | AcCoA   | Pyruvate:2-oxoglutarate:acetyl-CoA ligase, dehydrogenase                                     | CG000071  | pfam00676, c002000                         | TIGR03181                                  |   |   |   |   |   |   |
| arCG004279  | C | Energy production and conversion       | ThiF    | Thioester-lytic enzyme associated with predicted acetylase                                   | CG001989  | pfam01969, c001356                         |                                            |   |   |   | 1 |   |   |
| arCG000573  | C | Energy production and conversion       | SdhA    | Succinate dehydrogenase/fumarate reductase, flavoprotein subunit                             | CG001053  | pfam00890, pfam02910                       | TIGR02061                                  |   |   |   | 1 |   |   |
| arCG002618  | C | Energy production and conversion       | -       | Ferredoxin                                                                                   | CG001146  | pfam13187, pfam12139                       | TIGR02060                                  |   |   |   | 1 |   |   |
| arCG001235  | C | Energy production and conversion       | CyoA    | Heme/copper-type cytochrome/cytochrome oxidase, subunit 2                                    | CG001622  | pfam00116, c013918                         | TIGR02866                                  |   |   |   | 1 | 1 | 1 |
| arCG0040446 | C | Energy production and conversion       | FixA    | Electron transfer flavoprotein, beta subunit                                                 | CG002086  | pfam01012, c001714                         |                                            |   |   |   |   |   |   |
| arCG001252  | C | Energy production and conversion       | PutA    | Lactaldehyde dehydrogenase, Succinate semialdehyde dehydrogenase or other                    | CG001012  | pfam00171, c007088                         | TIGR02780                                  |   |   |   |   | 3 | 2 |
| arCG002088  | C | Energy production and conversion       | HnfB    | Hydroxynaphthyl succinate dehydrogenase                                                      | CG000778  | pfam00881, c002150                         | TIGR02785                                  |   |   |   |   |   |   |
| arCG004058  | C | Energy production and conversion       | Qor     | NADPH:guanine reductase or related 2n-dependent oxidoreductase                               | CG006004  | pfam00240, pfam00264                       | TIGR02824                                  |   |   |   |   |   | 1 |
| arCG000963  | C | Energy production and conversion       | GlpC    | Succinate dehydrogenase/fumarate reductase, Fe-S protein subunit                             | CG004079  | pfam13085, pfam13183, pfam02782            | TIGR00384, TIGR003288                      |   |   |   |   | 2 |   |
| arCG004650  | C | Energy production and conversion       | CyoC    | Heme/copper-type cytochrome/cytochrome oxidase, subunit 3                                    | CG001845  | pfam00510, c000386                         | TIGR02842                                  |   |   |   |   | 2 | 2 |
| arCG000338  | C | Energy production and conversion       | SdhC    | Succinate dehydrogenase subunit C                                                            | CG002048  | pfam02754, pfam02754                       | TIGR02288                                  |   |   |   |   | 2 | 1 |
| arCG003363  | C | Energy production and conversion       | NtpF    | Archaeal/vacuolar-type H+-ATPase subunit H                                                   | CG002811  |                                            |                                            |   |   |   |   |   |   |
| arCG000962  | C | Energy production and conversion       | FrdB    | Succinate dehydrogenase/fumarate reductase, Fe-S protein subunit                             | CG004079  | pfam13085, pfam13183                       | TIGR00384                                  |   |   |   |   | 2 | 1 |
| arCG002167  | C | Energy production and conversion       | Tss     | Transcriptional repressor, related to Hsf                                                    | CG000667  | pfam02048, c006660                         | TIGR02293                                  |   |   |   |   |   |   |
| arCG004358  | C | Energy production and conversion       | FrdH    | Uncharacterized protein required for formate dehydrogenase activity                          | CG001526  | pfam02634                                  | TIGR02120                                  |   |   |   |   | 3 | 1 |
| arCG001236  | C | Energy production and conversion       | CyoA    | Heme/copper-type cytochrome/cytochrome oxidase, subunit 2                                    | CG001622  | pfam00116, c013842                         | TIGR02866                                  |   |   |   |   |   |   |
| arCG002304  | C | Energy production and conversion       | Mct/CaB | Succinyl-CoA:mecanotransferase or predicted acyl-CoA transferase                             | CG001804  | pfam02515                                  | TIGR03253                                  |   |   |   |   |   |   |
| arCG004276  | C | Energy production and conversion       | HdrA    | Heterodisulfide reductase, subunit A; ferredoxin domain                                      | CG001148  | pfam07992, pfam13237, pfam13237            | TIGR03140, TIGR04105, TIGR03385, TIGR04105 |   |   |   |   |   | 1 |
| arCG002842  | C | Energy production and conversion       | Fdx     | Ferredoxin                                                                                   | CG00633   | pfam00111, c002007                         | TIGR02008                                  |   |   |   |   |   | 1 |
| arCG009746  | P | Inorganic ion transport and metabolism | -       | Sulfotransferase related protein                                                             | pfam00685 |                                            |                                            | 4 |   |   | 1 |   |   |
| arCG004750  | P | Inorganic ion transport and metabolism | Ecm27   | Strophothochlorin iron chelate fused to [2Fe-2S] ferredoxin                                  | CG002138  | pfam11853, pfam003416, c003414, c002980    |                                            |   |   |   |   | 1 |   |
| arCG002881  | P | Inorganic ion transport and metabolism | ECM27   | Co2+/Na+ antiporter                                                                          | CG005030  | pfam01699, pfam01699                       | TIGR02967                                  |   |   |   | 3 | 1 | 1 |
| arCG002006  | P | Inorganic ion transport and metabolism | PhnC    | ABC-type phosphate/phosphonate transport system, ATPase component                            | CG003638  | pfam00005, c003256                         | TIGR02315                                  |   |   |   | 3 |   |   |
| arCG002021  | P | Inorganic ion transport and metabolism | PspE    | Rhodanese-related sulfurtransferase                                                          | CG006007  | pfam00581, c000158                         | TIGR02981                                  |   |   |   | 2 | 1 | 1 |
| arCG004233  | P | Inorganic ion transport and metabolism | FepB    | ABC-type Fe3+-hydroxamate transport system, periplasmic component                            | CG006014  | pfam01497, c001143                         | TIGR04281                                  |   |   |   | 2 |   | 3 |
| arCG000163  | P | Inorganic ion transport and metabolism | ThiP    | ABC-type Fe3+-transport system, permease component                                           | CG001178  | pfam00528, pfam02621, c0062                | TIGR01262                                  |   |   |   | 2 | 1 |   |
| arCG002763  | P | Inorganic ion transport and metabolism | -       | Heavy-metal-associated domain (HMA)                                                          | CG002608  | pfam04043, c000371                         | TIGR02052                                  |   |   |   |   |   |   |
| arCG002138  | P | Inorganic ion transport and metabolism | NrB     | NrB/H+ antiporter NADH or related anion permease                                             | CG001053  | pfam03680                                  | TIGR00785                                  |   |   |   |   |   |   |
| arCG002005  | P | Inorganic ion transport and metabolism | LraI    | ABC-type metal ion transport system, periplasmic component/surface adhesion                  | CG000800  | pfam01297, c001018                         | TIGR03772, TIGR03772                       |   |   |   |   |   |   |
| arCG002851  | P | Inorganic ion transport and metabolism | (NirD)  | Ferredoxin subunit of nitrite reductase or ring-hydroxylating dioxygenase                    | CG002146  | pfam00355, c003467                         |                                            |   |   |   | 1 |   |   |
| arCG008934  | P | Inorganic ion transport and metabolism | -       | Alkylhydroperoxidase family enzyme                                                           | CG002128  | pfam02627                                  |                                            |   |   |   | 1 |   |   |
| arCG004487  | P | Inorganic ion transport and metabolism | KatG    | Catalase (peroxidase II)                                                                     | CG003076  | pfam00141, pfam00649, c0006                | TIGR00198                                  |   |   |   |   |   |   |
| arCG002497  | P | Inorganic ion transport and metabolism | -       | Upoprotein NosD family, contains CASH domains                                                | CG003420  | pfam12708                                  |                                            |   |   |   | 1 |   |   |
| arCG000318  | P | Inorganic ion transport and metabolism | PhoU    | Phosphate uptake regulator                                                                   | CG007074  | pfam04034, pfam01895, pfam01895            | TIGR02135                                  |   |   |   | 1 | 1 | 1 |
| arCG002637  | P | Inorganic ion transport and metabolism | -       | Upoprotein NosD family, contains CASH domains                                                | CG003420  | pfam12708                                  |                                            |   |   |   | 1 |   |   |
| arCG001959  | P | Inorganic ion transport and metabolism | TrkA    | TrkA, K+ transport system, NAD-binding component                                             | CG005059  | pfam02254, pfam02080, pfam02254, pfam02080 | TIGR02427, TIGR03024                       |   |   |   |   |   |   |
| arCG004231  | P | Inorganic ion transport and metabolism | CutA    | Uncharacterized protein involved in tolerance to divalent cations                            | CG001324  | pfam03091                                  |                                            |   |   |   |   | 3 | 1 |
| arCG002499  | P | Inorganic ion transport and metabolism | -       | Upoprotein NosD family, contains CASH domains                                                | CG003420  | pfam13229, pfam13229                       | TIGR04247                                  |   |   |   |   |   |   |
| arCG002265  | P | Inorganic ion transport and metabolism | CovA    | Mg2+ and Co2+ transporter                                                                    | CG00598   | pfam01544, c012828                         | TIGR00383                                  |   |   |   | 1 |   |   |
| arCG004397  | P | Inorganic ion transport and metabolism | AmB     | Ammonia permease                                                                             | CG000004  | pfam00909                                  | TIGR00836                                  |   |   |   | 1 |   |   |
| arCG002764  | P | Inorganic ion transport and metabolism | CopZ    | Copper ion-binding protein                                                                   | CG002608  | pfam04043, c000371                         | TIGR02052                                  |   |   |   |   | 1 | 1 |
| arCG001805  | P | Inorganic ion transport and metabolism | PhnD    | ABC-type phosphate/phosphonate transport system, periplasmic component                       | CG003221  | pfam12974, c001071                         | TIGR01098                                  |   |   |   |   |   |   |
| arCG002050  | P | Inorganic ion transport and metabolism | -       | Sulfite excretor, Tss/Salt family                                                            | CG000730  | pfam01925                                  |                                            |   |   |   | 2 | 1 |   |
| arCG002002  | P | Inorganic ion transport and metabolism | EcfA2   |                                                                                              |           |                                            |                                            |   |   |   |   |   |   |

[illegible]

[illegible]
