# Supplementary material
Source: PubMed Central journal article supplement (PMC5437922)
Supplement: ismej2016188x9.pdf [file ismej2016188x9.pdf]

Supplementary Table S7. Genes found in MG-III Metabolic Pathways

|                                                         | Epipelagic MG-III | Bathy1 | Bathy2 |
|---------------------------------------------------------|-------------------|--------|--------|
| <b>Glycolysis</b>                                       |                   |        |        |
| hexokinase (glk)                                        | --                | --     | --     |
| phosphoglucoisomerase (pgi)                             | X                 | X      | X      |
| phosphofruktokinase (pfkA)                              | X                 | --     | --     |
| aldolase (fba/dhnA)                                     | X                 | X      | X      |
| triosephosphate isomerase (tpi)                         | X                 | X      | --     |
| glyceraldehyde 3-phosphate dehydrogenase (gapA)         | X                 | X      | X      |
| 3-phosphoglycerate kinase (pgk)                         | X                 | X      | X      |
| phosphoglyceromutase (pgm/yibO)                         | X                 | X      | --     |
| enolase (eno)                                           | X                 | X      | --     |
| pyruvate kinase (pykA)                                  | --                | --     | --     |
| <b>Gluconeogenesis</b>                                  |                   |        |        |
| phosphoenolpyruvate synthase (ppsA)                     | X                 | X      | X      |
| enolase (eno)                                           | X                 | X      | --     |
| phosphoglyceromutase (pgm)                              | X                 | --     | --     |
| 3-phosphoglycerate kinase (pgk)                         | X                 | X      | X      |
| glyceraldehyde 3-phosphate dehydrogenase (gapA)         | X                 | X      | X      |
| triosephosphate isomerase (tpi)                         | X                 | X      | --     |
| aldolase (fba/dhnA)                                     | X                 | X      | X      |
| fructose bisphosphatase (suhB)                          | X                 | X      | X      |
| phosphoglucoisomerase (pgi)                             | X                 | X      | X      |
| <b>Pentose phosphate shunt and pentose biosynthesis</b> |                   |        |        |
| glucose-6-phosphate dehydrogenase (zwf)                 | --                | --     | --     |
| 6-phosphogluconate dehydrogenase (gnd)                  | --                | --     | --     |
| transketolase (tktA)                                    | X                 | X      | X      |
| transaldolase (talA)                                    | --                | --     | --     |
| pentose-5-phosphate-3-epimerase (yhfD)                  | X                 | X      | --     |
| ribose 5-phosphate isomerase (rpiA)                     | X                 | X      | X      |
| deoxyribose-phosphate aldolase (deoC)                   | --                | --     | --     |
| <b>Entner–Doudoroff pathway</b>                         |                   |        |        |
| glucose-6-phosphate dehydrogenase (zwf)                 | --                | --     | --     |
| 6-phosphogluconate dehydratase (edd)                    | --                | --     | --     |
| 2-keto-3-deoxy-6-phosphogluconate aldolase (eda)        | --                | --     | --     |
| <b>TCA cycle</b>                                        |                   |        |        |
| citrate synthase (gltA)                                 | X                 | X      | --     |
| aconitase (acnA)                                        | X                 | X      | X      |
| isocitrate dehydrogenase (icd)                          | X                 | --     | --     |
| a-ketoglutarate dehydrogenase (sucA, sucB)              | X                 | --     | --     |
| succinyl-CoA synthase (sucC, sucD)                      | X                 | X      | --     |
| fumarate reductase (frdA, frdB)                         | X                 | --     | --     |
| fumarase (fumA)                                         | X                 | X      | X      |
| malate dehydrogenase (mdh)                              | X                 | X      | --     |
| <b>Purine biosynthesis</b>                              |                   |        |        |
| phosphoribosylpyrophosphate synthase (prsA)             | X                 | X      | X      |
| amidophosphoribosyltransferase (purF)                   | X                 | X      | X      |
| GAR synthase (purD)                                     | X                 | X      | --     |
| GAR transformylase (purN/purT)                          | X                 | X      | X      |
| FGAM synthase (purL)                                    | X                 | X      | X      |
| AIR synthase (purM)                                     | X                 | X      | X      |
| NCAIR synthase (purK)                                   | --                | --     | --     |
| NCAIR mutase (purE)                                     | X                 | --     | X      |
| SAICAR synthase (purC)                                  | X                 | X      | --     |
| adenylosuccinate lyase (purB)                           | X                 | X      | X      |
| AICAR transformylase (purH2)                            | X                 | X      | X      |
| IMP cyclohydrolase (purH1)                              | X                 | X      | X      |
| adenylosuccinate synthase (purA)                        | X                 | X      | --     |
| IMP dehydrogenase (guaB)                                | X                 | --     | X      |
| GMP synthase (guaA)                                     | X                 | X      | --     |
| <b>Pyrimidine biosynthesis</b>                          |                   |        |        |
| carbamoylphosphate synthase (carA, carB)                | X                 | --     | X      |
| aspartate carbamoyltransferase (pyrB)                   | X                 | X      | --     |
| dihydroorotase (pyrC/ygeZ)                              | --                | --     | --     |
| dihydroorotate dehydrogenase (pyrD)                     | X                 | X      | X      |
| orotate phosphoribosyl-transferase (pyrE)               | X                 | X      | X      |
| orotidine-5'-phosphate decarboxylase (pyrF)             | X                 | --     | --     |
| UMP kinase (pyrH)                                       | --                | --     | --     |

|                                                |                                                        |    |    |    |
|------------------------------------------------|--------------------------------------------------------|----|----|----|
|                                                | NDP kinase (ndk)                                       | X  | X  | X  |
|                                                | CTP synthase (pyrG)                                    | X  | X  | -- |
| <b>Histidine biosynthesis</b>                  |                                                        |    |    |    |
|                                                | phosphosphoribosylpyrophosphate synthase (prsA)        | X  | X  | X  |
|                                                | ATP-phosphoribosyltransferase (hisG)                   | -- | -- | -- |
|                                                | phosphoribosyl-ATP pyrophosphatase (hisI2)             | -- | -- | -- |
|                                                | phosphoribosyl-AMP cyclohydrolase(hisI1)               | -- | -- | -- |
|                                                | 58-ProFAR isomerase (hisA)                             | -- | -- | -- |
|                                                | imidazoleglycerol phosphate synthase (hisH, hisF)      | -- | -- | -- |
|                                                | imidazoleglycerol phosphate dehydratase (hisB2)        | -- | -- | -- |
|                                                | histidinoll phosphate aminotransferase (hisC)          | X  | X  | -- |
|                                                | histidinol phosphatase (hisB1)                         | -- | -- | -- |
|                                                | histidinol dehydrogenase (hisD)                        | -- | -- | -- |
| <b>Branched chain amino acids biosynthesis</b> |                                                        |    |    |    |
|                                                | threonine deaminase (ilvA)                             | X  | -- | X  |
|                                                | acetoxyhydroxyacid synthase (ilvB, ilvN)               | -- | X  | -- |
|                                                | acetoxyhydroxyacid isomeroeductase (ilvC)              | -- | -- | -- |
|                                                | dihydroxyacid dehydratase (ilvD)                       | -- | -- | -- |
|                                                | 2-isopropylmalate synthase (leuA)                      | -- | -- | -- |
|                                                | isopropylmalate isomerase (leuC, leuD)                 | -- | -- | -- |
|                                                | 3-isopropyl-malate dehydrogenase (leuB)                | -- | -- | -- |
|                                                | glutamate transaminase (ilvE)                          | X  | X  | -- |
| <b>Aromatic amino acids biosynthesis</b>       |                                                        |    |    |    |
|                                                | 3-deoxyheptulosonate 7-phosphate synthase (aroG/kdsA)  | -- | -- | -- |
|                                                | 3-dehydroquininate synthase (aroB)                     | -- | -- | -- |
|                                                | 3-dehydroquininate dehydratase (aroD)                  | -- | -- | -- |
|                                                | shikimate dehydrogenase (aroE)                         | -- | -- | -- |
|                                                | shikimate kinase (aroK)                                | -- | -- | -- |
|                                                | 5-enolpyruvoylshikimate 3-phosphate synthase (aroA)    | -- | -- | -- |
|                                                | chorismate synthase (aroC)                             | -- | -- | -- |
|                                                | chorismate mutase (pheA1)                              | -- | -- | -- |
|                                                | prephenate dehydratase (pheA2)                         | -- | -- | -- |
|                                                | prephenate dehydrogenase (tyrA2)                       | -- | -- | -- |
|                                                | tyrosine aminotransferase (tyrB)                       | -- | -- | -- |
|                                                | antranilate synthase (trpD1, trpE)                     | -- | -- | -- |
|                                                | antranilate phosphoribosyl-transferase (trpD2)         | -- | -- | -- |
|                                                | phosphoribosylantranilate isomerase (trpC2)            | -- | -- | -- |
|                                                | indole-glycerol phosphate synthase (trpC1)             | -- | -- | -- |
|                                                | tryptophan synthase (trpA, trpB)                       | X  | -- | -- |
| <b>Threonine biosynthesis</b>                  |                                                        |    |    |    |
|                                                | aspartokinase (thrA1)                                  | -- | -- | -- |
|                                                | aspartate semialdehyde dehydrogenase (asd)             | -- | -- | -- |
|                                                | homoserine dehydrogenase (thrA2)                       | -- | -- | -- |
|                                                | homoserine kinase (thrB)                               | -- | -- | -- |
|                                                | threonine synthase (thrC)                              | -- | -- | -- |
| <b>Methionine biosynthesis</b>                 |                                                        |    |    |    |
|                                                | aspartokinase (metL1)                                  | -- | -- | -- |
|                                                | aspartate semialdehyde dehydrogenase (asd)             | -- | -- | -- |
|                                                | homoserine dehydrogenase (metL2)                       | -- | -- | -- |
|                                                | homoserine transsuccinylase (metA)                     | -- | -- | -- |
|                                                | cystathionine g-synthase (metB)                        | X  | X  | X  |
|                                                | b-cystathionase (metC)                                 | -- | -- | -- |
|                                                | methionine synthase (metE/metH)                        | -- | -- | -- |
| <b>Arginine biosynthesis</b>                   |                                                        |    |    |    |
|                                                | acetylglutamate synthase (argA2)                       | -- | -- | -- |
|                                                | acetylglutamate kinase (argB)                          | X  | -- | -- |
|                                                | acetylglutamate phosphate reductase (argC)             | -- | -- | -- |
|                                                | acetylornithine aminotransferase (argD)                | X  | -- | -- |
|                                                | acetylornithinase (argE)                               | X  | -- | -- |
|                                                | ornithine carbamoyltransferase (argF)                  | X  | X  | -- |
|                                                | argininosuccinate synthase (argG)                      | -- | -- | -- |
|                                                | argininosuccinate lyase (argH)                         | -- | -- | -- |
| <b>NAD biosynthesis</b>                        |                                                        |    |    |    |
|                                                | aspartate oxidase (nadB)                               | -- | -- | -- |
|                                                | quinolinate synthase (nadA)                            | X  | X  | -- |
|                                                | quinolinate phosphoribosyltransferase (nadC)           | X  | X  | -- |
|                                                | nicotinic acid mononucleotide adenyltransferase (nadD) | -- | -- | -- |
|                                                | deamido-NAD ammonia ligase (nadE)                      | X  | X  | X  |

|                                |                                                                              |    |    |    |
|--------------------------------|------------------------------------------------------------------------------|----|----|----|
| <b>Riboflavin biosynthesis</b> | GTP cyclohydrolase II (ribA)                                                 | X  | X  | -- |
|                                | pyrimidine deaminase (ribD1)                                                 | -- | -- | -- |
|                                | pyrimidine reductase (ribD2)                                                 | X  | X  | X  |
|                                | 3,4-dihydroxybutanone-4-phosphate synthase (ribB)                            | X  | X  | -- |
|                                | 6,7-dimethyl-8-ribityllumazine synthase (ribE)                               | X  | X  | -- |
|                                | riboflavin synthase (ribC)                                                   | X  | X  | -- |
| <b>Siroheme biosynthesis</b>   | Glutamyl-tRNA reductase (hemA)                                               | -- | -- | -- |
|                                | glutamate 1-semialdehyde aminotransferase (hemL)                             | -- | -- | -- |
|                                | probilinogen III synthase (hemB)                                             | -- | -- | -- |
|                                | hydroxymethylbilane synthase (hemC)                                          | -- | -- | -- |
|                                | uroporphyrinogen III synthase (hemD)                                         | -- | -- | -- |
|                                | uroporphyrinogen methyltransferase (cysG2)                                   | -- | -- | -- |
|                                | dimethyluroporphyrinogen III dehydrogenase (cysG1)                           | -- | -- | -- |
| <b>Cobalamin biosynthesis</b>  | uroporphyrinogen III methylase (cysG2)                                       | -- | -- | -- |
|                                | precorrin-2 methylase (cbiL)                                                 | -- | -- | -- |
|                                | precorrin-3B methylase (cbiH)                                                | -- | -- | -- |
|                                | precorrin-4 methylase (cbiF)                                                 | -- | -- | -- |
|                                | precorrin-6A reductase (cbiJ)                                                | -- | -- | -- |
|                                | precorrin 6B methylase (cbiE)                                                | -- | -- | -- |
|                                | precorrin 6B decarboxylase (cbiT)                                            | -- | -- | -- |
|                                | precorrin-8x isomerase (cbiC)                                                | -- | -- | -- |
|                                | cobyric acid a,c-diamide synthase (cbiA)                                     | -- | -- | -- |
|                                | cobalt insertion protein (cobN)                                              | -- | -- | -- |
|                                | cob(I)alamin adenosyltransferase (cobA)                                      | -- | -- | -- |
|                                | cobyric acid synthase (cbiP)                                                 | -- | -- | -- |
|                                | cobyric acid aminotransferase (cobD)                                         | -- | -- | -- |
|                                | cobinamide synthase (cbiB)                                                   | -- | -- | -- |
|                                | nicotinate-nucleotide:dimethylbenzimidazole phosphoribosyltransferase (cobT) | -- | -- | -- |
| cobalamin synthase (cobS)      | --                                                                           | -- | -- |    |
| <b>Biotin biosynthesis</b>     | pimeloyl-CoA synthetase (bioW)                                               | -- | -- | -- |
|                                | 7-keto-8-aminopelargonate synthetase (bioF)                                  | X  | X  | -- |
|                                | 7,8-diaminopelargonate aminotransferase (bioA)                               | -- | -- | -- |
|                                | dethiobiotin synthetase (bioD)                                               | -- | -- | -- |
|                                | biotin synthetase (bioB)                                                     | -- | -- | -- |
|                                | biotin-[acetyl-CoA carboxylase] holoenzyme synthetase (birA)                 | X  | X  | X  |

Cells marked with a "X" means that the protein was found.
